# Supplementary material for: Mapping the Landscape of AI-empowered Psychology: A Topic Modeling-based Bibliometric Analysis
Source: Research Square preprint supplement (doi:10.21203/rs.3.rs-7227602/v1), 2025-08-27
Supplement: Supplementary file 1 [file 4848fd4c8a9149f618f7ec44.xlsx]

## Sheet: Sheet1
title	Topic	Name	CustomName	Representation	Representative_Docs	Top_n_words	Probability	Representative_document	TYPE	AU_KEY	YEAR	cited	source
Hilbert Space Multidimensional Theory	0	0_language_cognitive_word_computational	Topic1-Human Cognitive Science	['language', 'cognitive', 'word', 'computational', 'neural', 'human', 'representations', 'models', 'cognition', 'knowledge', 'model', 'semantic', 'artificial', 'learning', 'words', 'information', 'cognitive science', 'reasoning', 'representation', 'intelligence']	['Artificial intelligence, human cognition, and conscious supremacy. The computational significance of consciousness is an important and potentially more tractable research theme than the hard problem of consciousness, as one could look at the correlation of consciousness and computational capacities through, e.g., algorithmic or complexity analyses. In the literature, consciousness is defined as…	language - cognitive - word - computational - neural - human - representations - models - cognition - knowledge - model - semantic - artificial - learning - words - information - cognitive science - reasoning - representation - intelligence	0.0887056	FALSE	Article	quantum cognition; Bayesian networks; social cognition; context effects; contingency table analysis	2018	16	PSYCHOLOGICAL REVIEW
Image statistics for material perception	14	14_visual_object_objects_category	Topic11-Visual Processing Mechanism and Modeling	['visual', 'object', 'objects', 'category', 'scene', 'image', 'images', 'vision', 'similarity', 'categorization', 'representations', 'shape', 'categories', 'stimuli', 'scenes', 'neural', 'cnns', 'recognition', 'memory', 'networks']	['A failure to learn object shape geometry: Implications for convolutional neural networks as plausible models of biological vision. Here we examine the plausibility of deep convolutional neural networks (CNNs) as a theoretical framework for understanding biological vision in the context of image classification. Recent work on object recognition in human vision has shown that both global, and loc…	visual - object - objects - category - scene - image - images - vision - similarity - categorization - representations - shape - categories - stimuli - scenes - neural - cnns - recognition - memory - networks	0.6126	FALSE	Review		2019	20	CURRENT OPINION IN BEHAVIORAL SCIENCES
A Visual-Familiarity Account of Evidence for Orthographic Processing in Baboons (Papio papio)	0	0_language_cognitive_word_computational	Topic1-Human Cognitive Science	['language', 'cognitive', 'word', 'computational', 'neural', 'human', 'representations', 'models', 'cognition', 'knowledge', 'model', 'semantic', 'artificial', 'learning', 'words', 'information', 'cognitive science', 'reasoning', 'representation', 'intelligence']	['Artificial intelligence, human cognition, and conscious supremacy. The computational significance of consciousness is an important and potentially more tractable research theme than the hard problem of consciousness, as one could look at the correlation of consciousness and computational capacities through, e.g., algorithmic or complexity analyses. In the literature, consciousness is defined as…	language - cognitive - word - computational - neural - human - representations - models - cognition - knowledge - model - semantic - artificial - learning - words - information - cognitive science - reasoning - representation - intelligence	0.142544	FALSE	Article	word recognition; artificial neural networks; baboons; visual memory; orthographic processing; familiarity; principal component analysis; episodic memory	2014	10	PSYCHOLOGICAL SCIENCE
Statistical judgment formation in personnel selection: A study in military aviation psychology	3	3_personality_media_sentiment_social	Topic3-ML-based Personality Assessment	['personality', 'media', 'sentiment', 'social', 'social media', 'text', 'language', 'twitter', 'big', 'online', 'users', 'sentiment analysis', 'traits', 'natural language', 'news', 'content', 'public', 'analysis', 'data', 'psychological']	["Exploring a Language-Based Interest Assessment: Predicting Vocational Interests on Social Media Using Natural Language Processing. For more than a century, self-report inventories have been the traditional method for assessing vocational interests. Little research has examined the use of machine learning techniques, such as natural language processing (NLP), in interest assessment. This paper e…	personality - media - sentiment - social - social media - text - language - twitter - big - online - users - sentiment analysis - traits - natural language - news - content - public - analysis - data - psychological	1	FALSE	Article		2007	9	MILITARY PSYCHOLOGY
Robot learning driven by emotions	0	0_language_cognitive_word_computational	Topic1-Human Cognitive Science	['language', 'cognitive', 'word', 'computational', 'neural', 'human', 'representations', 'models', 'cognition', 'knowledge', 'model', 'semantic', 'artificial', 'learning', 'words', 'information', 'cognitive science', 'reasoning', 'representation', 'intelligence']	['Artificial intelligence, human cognition, and conscious supremacy. The computational significance of consciousness is an important and potentially more tractable research theme than the hard problem of consciousness, as one could look at the correlation of consciousness and computational capacities through, e.g., algorithmic or complexity analyses. In the literature, consciousness is defined as…	language - cognitive - word - computational - neural - human - representations - models - cognition - knowledge - model - semantic - artificial - learning - words - information - cognitive science - reasoning - representation - intelligence	1	FALSE	Article	robotics; emotions; reinforcement learning	2001	47	ADAPTIVE BEHAVIOR
Fuzzy deep learning based urban traffic incident detection	24	24_driving_workload_driver_drivers	Topic25-Mental Workload Evaluation	['driving', 'workload', 'driver', 'drivers', 'mental workload', 'traffic', 'road', 'vehicle', 'distraction', 'cognitive load', 'load', 'pedestrian', 'safety', 'task', 'cognitive workload', 'fatigue', 'physiological', 'simulator', 'drowsiness', 'eye']	["Driver's mental workload classification using physiological, traffic flow and environmental factors. During the dynamic driving process, classification of mental workload for drivers is a complex task due to multiple factors, including human, vehicle, road, and the environment. Many current studies focus on the impacts of a single factor, such as physiological signal, lane changing, and so on, …	driving - workload - driver - drivers - mental workload - traffic - road - vehicle - distraction - cognitive load - load - pedestrian - safety - task - cognitive workload - fatigue - physiological - simulator - drowsiness - eye	1	FALSE	Article	Automatic traffic incident detection; Fuzzy deep learning; Deep artificial neural network; Stacked auto-encoder model; Back-propagation algorithm; Fuzzy logic controller	2018	54	COGNITIVE SYSTEMS RESEARCH
A Simplified CNN Classification Method for MI-EEG via the Electrode Pairs Signals	17	17_bci_eeg_gaze_eye	Topic23-Brain-Computer Interface	['bci', 'eeg', 'gaze', 'eye', 'brain computer', 'signals', 'mi', 'fnirs', 'brain computer interface', 'classification', 'computer interface', 'signal', 'motor imagery', 'motor', 'bcis', 'computer', 'imagery', 'decoding', 'eeg signals', 'interface']	['Artificial Intelligence Algorithms in Visual Evoked Potential-Based Brain-Computer Interfaces for Motor Rehabilitation Applications: Systematic Review and Future Directions. Brain-Computer Interface (BCI) is a technology that uses electroencephalographic (EEG) signals to control external devices, such as Functional Electrical Stimulation (FES). Visual BCI paradigms based on P300 and Steady Stat…	bci - eeg - gaze - eye - brain computer - signals - mi - fnirs - brain computer interface - classification - computer interface - signal - motor imagery - motor - bcis - computer - imagery - decoding - eeg signals - interface	1	FALSE	Article	brain computer interface (BCI); electroencephalography (EEG); electrode pairs; motor imagery (MI); convolutional neural network (CNN)	2020	61	FRONTIERS IN HUMAN NEUROSCIENCE
Multiplexing working memory and time in the trajectories of neural networks	0	0_language_cognitive_word_computational	Topic1-Human Cognitive Science	['language', 'cognitive', 'word', 'computational', 'neural', 'human', 'representations', 'models', 'cognition', 'knowledge', 'model', 'semantic', 'artificial', 'learning', 'words', 'information', 'cognitive science', 'reasoning', 'representation', 'intelligence']	['Artificial intelligence, human cognition, and conscious supremacy. The computational significance of consciousness is an important and potentially more tractable research theme than the hard problem of consciousness, as one could look at the correlation of consciousness and computational capacities through, e.g., algorithmic or complexity analyses. In the literature, consciousness is defined as…	language - cognitive - word - computational - neural - human - representations - models - cognition - knowledge - model - semantic - artificial - learning - words - information - cognitive science - reasoning - representation - intelligence	0.436087	FALSE	Article		2023	5	NATURE HUMAN BEHAVIOUR
Differential effects of intrinsic properties of natural scenes and interference mechanisms on recognition processes in long-term visual memory	14	14_visual_object_objects_category	Topic11-Visual Processing Mechanism and Modeling	['visual', 'object', 'objects', 'category', 'scene', 'image', 'images', 'vision', 'similarity', 'categorization', 'representations', 'shape', 'categories', 'stimuli', 'scenes', 'neural', 'cnns', 'recognition', 'memory', 'networks']	['A failure to learn object shape geometry: Implications for convolutional neural networks as plausible models of biological vision. Here we examine the plausibility of deep convolutional neural networks (CNNs) as a theoretical framework for understanding biological vision in the context of image classification. Recent work on object recognition in human vision has shown that both global, and loc…	visual - object - objects - category - scene - image - images - vision - similarity - categorization - representations - shape - categories - stimuli - scenes - neural - cnns - recognition - memory - networks	1	FALSE	Article	Long-term visual memory; Semantic and perceptual information; Deep neural network; Interference; Metacognition	2024	2	COGNITIVE PROCESSING
Object Vision in a Structured World	14	14_visual_object_objects_category	Topic11-Visual Processing Mechanism and Modeling	['visual', 'object', 'objects', 'category', 'scene', 'image', 'images', 'vision', 'similarity', 'categorization', 'representations', 'shape', 'categories', 'stimuli', 'scenes', 'neural', 'cnns', 'recognition', 'memory', 'networks']	['A failure to learn object shape geometry: Implications for convolutional neural networks as plausible models of biological vision. Here we examine the plausibility of deep convolutional neural networks (CNNs) as a theoretical framework for understanding biological vision in the context of image classification. Recent work on object recognition in human vision has shown that both global, and loc…	visual - object - objects - category - scene - image - images - vision - similarity - categorization - representations - shape - categories - stimuli - scenes - neural - cnns - recognition - memory - networks	1	FALSE	Review		2019	93	TRENDS IN COGNITIVE SCIENCES
Predictive modeling of addiction lapses in a mobile health application	9	9_alcohol_substance_eating_use	Topic14-Substance Abuse Prediction	['alcohol', 'substance', 'eating', 'use', 'substance use', 'drinking', 'cannabis', 'alcohol use', 'use disorder', 'aud', 'binge', 'opioid', 'dependence', 'treatment', 'smoking', 'overdose', 'consumption', 'addiction', 'drug', 'binge eating']	['The prediction of resilience to alcohol consumption in youths: insular and subcallosal cingulate myeloarchitecture. Background The prediction of alcohol consumption in youths and particularly biomarkers of resilience, is critical for early intervention to reduce the risk of subsequent harmful alcohol use. Methods At baseline, the longitudinal relaxation rate (R1), indexing grey matter myelinati…	alcohol - substance - eating - use - substance use - drinking - cannabis - alcohol use - use disorder - aud - binge - opioid - dependence - treatment - smoking - overdose - consumption - addiction - drug - binge eating	1	FALSE	Article	Alcoholism; Relapse; Machine learning; Lapse prediction; mHealth	2014	71	JOURNAL OF SUBSTANCE ABUSE TREATMENT
Robust and replicable functional brain signatures of 22q11.2 deletion syndrome and associated psychosis: a deep neural network-based multi-cohort study	5	5_schizophrenia_psychosis_patients_controls	Topic8-Schizophrenia Detection	['schizophrenia', 'psychosis', 'patients', 'controls', 'functional', 'patients schizophrenia', 'episode', 'clinical', 'healthy', 'chr', 'schizophrenia patients', 'scz', 'sz', 'antipsychotic', 'healthy controls', 'connectivity', 'fep', 'brain', 'psychotic', 'classification']	['Metacognitive Training Modulates Default-Mode Network Homogeneity During 8-Week Olanzapine Treatment in Patients With Schizophrenia. Background Previous studies have revealed the efficacy of metacognitive training for schizophrenia. However, the underlying mechanisms of metacognitive training on brain function alterations, including the default-mode network (DMN), remain unknown. The present st…	schizophrenia - psychosis - patients - controls - functional - patients schizophrenia - episode - clinical - healthy - chr - schizophrenia patients - scz - sz - antipsychotic - healthy controls - connectivity - fep - brain - psychotic - classification	0.446887	FALSE	Article		2024	0	MOLECULAR PSYCHIATRY
Emergent Virtual Analytics: Artificial Intelligence and Human-Computer Interactions	11	11_trust_ai_human_moral	Topic5-Trust in AI	['trust', 'ai', 'human', 'moral', 'agents', 'intelligence', 'artificial intelligence', 'artificial', 'humans', 'decision', 'team', 'robots', 'systems', 'teams', 'agent', 'people', 'xai', 'human ai', 'artificial intelligence ai', 'intelligence ai']	["When combinations of humans and AI are useful: A systematic review and meta-analysis. Inspired by the increasing use of artificial intelligence (AI) to augment humans, researchers have studied human-AI systems involving different tasks, systems and populations. Despite such a large body of work, we lack a broad conceptual understanding of when combinations of humans and AI are better than eithe…	trust - ai - human - moral - agents - intelligence - artificial intelligence - artificial - humans - decision - team - robots - systems - teams - agent - people - xai - human ai - artificial intelligence ai - intelligence ai	0.0980753	FALSE	Article	Artificial intelligence; Combinatorial entailment; Deep learning; Deep neural network; Machine bias; Multilayer perceptron	2020	10	BEHAVIOR AND SOCIAL ISSUES
Deep Neural Networks Are More Accurate Than Humans at Detecting Sexual Orientation From Facial Images	6	6_facial_music_emotion_faces	Topic9-Affective Computing	['facial', 'music', 'emotion', 'faces', 'emotions', 'recognition', 'expressions', 'face', 'emotion recognition', 'emotional', 'musical', 'facial expressions', 'audio', 'eeg', 'expression', 'features', 'facial expression', 'affective', 'signals', 'valence']	["Facial Expression Emotion Recognition Model Integrating Philosophy and Machine Learning Theory. Facial expression emotion recognition is an intuitive reflection of a person's mental state, which contains rich emotional information, and is one of the most important forms of interpersonal communication. It can be used in various fields, including psychology. As a celebrity in ancient China, Zeng …	facial - music - emotion - faces - emotions - recognition - expressions - face - emotion recognition - emotional - musical - facial expressions - audio - eeg - expression - features - facial expression - affective - signals - valence	0.0865481	FALSE	Article	sexual orientation; facial morphology; prenatal hormone theory; computational social science; privacy	2018	335	JOURNAL OF PERSONALITY AND SOCIAL PSYCHOLOGY
Easy and Low-Cost Identification of Metabolic Syndrome in Patients Treated With Second-Generation Antipsychotics: Artificial Neural Network and Logistic Regression Models	15	15_genes_gene_bipolar_bd	Topic21-Biomarkers of Mental Disorders	['genes', 'gene', 'bipolar', 'bd', 'blood', 'bipolar disorder', 'mdd', 'immune', 'disorder', 'biomarkers', 'lithium', 'expression', 'gene expression', 'methylation', 'schizophrenia', 'inflammatory', 'il', 'protein', 'cell', 'peripheral']	['Immune-based Machine learning Prediction of Diagnosis and Illness State in Schizophrenia and Bipolar Disorder. Background Schizophrenia and bipolar disorder frequently face significant delay in diagnosis, leading to being missed or misdiagnosed in early stages. Both disorders have also been associated with trait and state immune abnormalities. Recent machine learning-based studies have shown en…	genes - gene - bipolar - bd - blood - bipolar disorder - mdd - immune - disorder - biomarkers - lithium - expression - gene expression - methylation - schizophrenia - inflammatory - il - protein - cell - peripheral	0.114206	FALSE	Article		2010	33	JOURNAL OF CLINICAL PSYCHIATRY
Content and cluster analysis: assessing representational similarity in neural systems	0	0_language_cognitive_word_computational	Topic1-Human Cognitive Science	['language', 'cognitive', 'word', 'computational', 'neural', 'human', 'representations', 'models', 'cognition', 'knowledge', 'model', 'semantic', 'artificial', 'learning', 'words', 'information', 'cognitive science', 'reasoning', 'representation', 'intelligence']	['Artificial intelligence, human cognition, and conscious supremacy. The computational significance of consciousness is an important and potentially more tractable research theme than the hard problem of consciousness, as one could look at the correlation of consciousness and computational capacities through, e.g., algorithmic or complexity analyses. In the literature, consciousness is defined as…	language - cognitive - word - computational - neural - human - representations - models - cognition - knowledge - model - semantic - artificial - learning - words - information - cognitive science - reasoning - representation - intelligence	0.227809	FALSE	Article		2000	72	PHILOSOPHICAL PSYCHOLOGY
Directionality of large-scale resting-state brain networks during eyes open and eyes closed conditions	23	23_epilepsy_seizure_seizures_eeg	Topic22-Epilepsy Detection	['epilepsy', 'seizure', 'seizures', 'eeg', 'patients', 'epileptic', 'diagnosis', 'detection', 'brain', 'temporal', 'gyrus', 'classification', 'temporal lobe', 'lobe', 'neurological', 'features', 'functional', 'method', 'clinical', 'fnirs']	['Altered voxel-mirrored homotopic connectivity in right temporal lobe epilepsy as measured using resting-state fMRI and support vector machine analyses. BackgroundPrior reports revealed abnormalities in voxel-mirrored homotopic connectivity (VMHC) when analyzing neuroimaging data from patients with various psychiatric conditions, including temporal lobe epilepsy (TLE). Whether these VHMC changes…	epilepsy - seizure - seizures - eeg - patients - epileptic - diagnosis - detection - brain - temporal - gyrus - classification - temporal lobe - lobe - neurological - features - functional - method - clinical - fnirs	1	FALSE	Article	resting-state fMRI; independent component analysis (ICA); Gaussian Bayesian network (BN); support vector machine (SVM); eyes closed; eyes open	2015	20	FRONTIERS IN HUMAN NEUROSCIENCE
A neural architecture for rule-guided behavior: A simulation of physiological experiments	0	0_language_cognitive_word_computational	Topic1-Human Cognitive Science	['language', 'cognitive', 'word', 'computational', 'neural', 'human', 'representations', 'models', 'cognition', 'knowledge', 'model', 'semantic', 'artificial', 'learning', 'words', 'information', 'cognitive science', 'reasoning', 'representation', 'intelligence']	['Artificial intelligence, human cognition, and conscious supremacy. The computational significance of consciousness is an important and potentially more tractable research theme than the hard problem of consciousness, as one could look at the correlation of consciousness and computational capacities through, e.g., algorithmic or complexity analyses. In the literature, consciousness is defined as…	language - cognitive - word - computational - neural - human - representations - models - cognition - knowledge - model - semantic - artificial - learning - words - information - cognitive science - reasoning - representation - intelligence	1	FALSE	Article	rule-guided behavior; recurrent network; prefrontal cortex; working memory	2003	0	PSYCHOLOGIA
Auto-AzKNIOSH: an automatic NIOSH evaluation with Azure Kinect coupled with task recognition	20	20_sports_players_athletes_sport	Topic24-AI in Sports Psychology	['sports', 'players', 'athletes', 'sport', 'physical', 'lifting', 'soccer', 'football', 'postures', 'gait', 'education', 'performance', 'training', 'coaches', 'basketball', 'player', 'muscle', 'action', 'body', 'posture']	["Recognizing upper limb movements with wrist worn inertial sensors using k-means clustering classification. In this paper we present a methodology for recognizing three fundamental movements of the human forearm (extension, flexion and rotation) using pattern recognition applied to the data from a single wrist-worn, inertial sensor. We propose that this technique could be used as a clinical tool…	sports - players - athletes - sport - physical - lifting - soccer - football - postures - gait - education - performance - training - coaches - basketball - player - muscle - action - body - posture	1	FALSE	Article; Early Access	Motion capture; ergonomics; kinect; picking; task recognition	2024	0	ERGONOMICS
Emotion Analysis of Ideological and Political Education Using a GRU Deep Neural Network	3	3_personality_media_sentiment_social	Topic3-ML-based Personality Assessment	['personality', 'media', 'sentiment', 'social', 'social media', 'text', 'language', 'twitter', 'big', 'online', 'users', 'sentiment analysis', 'traits', 'natural language', 'news', 'content', 'public', 'analysis', 'data', 'psychological']	["Exploring a Language-Based Interest Assessment: Predicting Vocational Interests on Social Media Using Natural Language Processing. For more than a century, self-report inventories have been the traditional method for assessing vocational interests. Little research has examined the use of machine learning techniques, such as natural language processing (NLP), in interest assessment. This paper e…	personality - media - sentiment - social - social media - text - language - twitter - big - online - users - sentiment analysis - traits - natural language - news - content - public - analysis - data - psychological	0.0690892	FALSE	Article	GRU; deep learning; political and ideological education; emotion analysis; feature fusion	2022	4	FRONTIERS IN PSYCHOLOGY
A corpus-based computational model of metaphor understanding consisting of two processes	0	0_language_cognitive_word_computational	Topic1-Human Cognitive Science	['language', 'cognitive', 'word', 'computational', 'neural', 'human', 'representations', 'models', 'cognition', 'knowledge', 'model', 'semantic', 'artificial', 'learning', 'words', 'information', 'cognitive science', 'reasoning', 'representation', 'intelligence']	['Artificial intelligence, human cognition, and conscious supremacy. The computational significance of consciousness is an important and potentially more tractable research theme than the hard problem of consciousness, as one could look at the correlation of consciousness and computational capacities through, e.g., algorithmic or complexity analyses. In the literature, consciousness is defined as…	language - cognitive - word - computational - neural - human - representations - models - cognition - knowledge - model - semantic - artificial - learning - words - information - cognitive science - reasoning - representation - intelligence	0.500607	FALSE	Article	Neural network; Language statistical analysis; Metaphor understanding; Dynamic interaction	2012	8	COGNITIVE SYSTEMS RESEARCH
Binding the Person-Specific Approach to Modern AI in the Human Screenome Project: Moving past Generalizability to Transferability	0	0_language_cognitive_word_computational	Topic1-Human Cognitive Science	['language', 'cognitive', 'word', 'computational', 'neural', 'human', 'representations', 'models', 'cognition', 'knowledge', 'model', 'semantic', 'artificial', 'learning', 'words', 'information', 'cognitive science', 'reasoning', 'representation', 'intelligence']	['Artificial intelligence, human cognition, and conscious supremacy. The computational significance of consciousness is an important and potentially more tractable research theme than the hard problem of consciousness, as one could look at the correlation of consciousness and computational capacities through, e.g., algorithmic or complexity analyses. In the literature, consciousness is defined as…	language - cognitive - word - computational - neural - human - representations - models - cognition - knowledge - model - semantic - artificial - learning - words - information - cognitive science - reasoning - representation - intelligence	0.0578558	FALSE	Article	Transfer learning; experience sampling; ecological momentary assessment; foundation models; >	2024	5	MULTIVARIATE BEHAVIORAL RESEARCH
Deep active inference as variational policy gradients	0	0_language_cognitive_word_computational	Topic1-Human Cognitive Science	['language', 'cognitive', 'word', 'computational', 'neural', 'human', 'representations', 'models', 'cognition', 'knowledge', 'model', 'semantic', 'artificial', 'learning', 'words', 'information', 'cognitive science', 'reasoning', 'representation', 'intelligence']	['Artificial intelligence, human cognition, and conscious supremacy. The computational significance of consciousness is an important and potentially more tractable research theme than the hard problem of consciousness, as one could look at the correlation of consciousness and computational capacities through, e.g., algorithmic or complexity analyses. In the literature, consciousness is defined as…	language - cognitive - word - computational - neural - human - representations - models - cognition - knowledge - model - semantic - artificial - learning - words - information - cognitive science - reasoning - representation - intelligence	0.563429	FALSE	Article	Active inference; Predictive processing; Neural networks; Policy gradients; Reinforcement learning	2020	44	JOURNAL OF MATHEMATICAL PSYCHOLOGY
Confirmation bias emerges from an approximation to Bayesian reasoning	0	0_language_cognitive_word_computational	Topic1-Human Cognitive Science	['language', 'cognitive', 'word', 'computational', 'neural', 'human', 'representations', 'models', 'cognition', 'knowledge', 'model', 'semantic', 'artificial', 'learning', 'words', 'information', 'cognitive science', 'reasoning', 'representation', 'intelligence']	['Artificial intelligence, human cognition, and conscious supremacy. The computational significance of consciousness is an important and potentially more tractable research theme than the hard problem of consciousness, as one could look at the correlation of consciousness and computational capacities through, e.g., algorithmic or complexity analyses. In the literature, consciousness is defined as…	language - cognitive - word - computational - neural - human - representations - models - cognition - knowledge - model - semantic - artificial - learning - words - information - cognitive science - reasoning - representation - intelligence	0.0897277	FALSE	Article	Confirmation bias; Source reliability; Information processing; Bayesian; Cognitive model; Bounded rationality	2024	2	COGNITION
Distinguishing different types of attention deficit hyperactivity disorder in children using artificial neural network with clinical intelligent test	26	26_adhd_hyperactivity_hyperactivity disorder_deficit hyperactivity disorder	Topic27-ADHD Detection	['adhd', 'hyperactivity', 'hyperactivity disorder', 'deficit hyperactivity disorder', 'deficit hyperactivity', 'attention deficit', 'attention deficit hyperactivity', 'deficit', 'disorder adhd', 'hyperactivity disorder adhd', 'attention', 'children', 'children adhd', 'adult adhd', 'adhd symptoms', 'disorder', 'adult', 'adhd diagnosis', 'symptoms', 'diagnosis']	['Application and Expansion of an Algorithm Predicting Attention-Deficit/Hyperactivity Disorder and Impairment in a Predominantly White Sample. Current assessment protocols for attention-deficit/hyperactivity disorder (ADHD) focus heavily on a set of highly overlapping symptoms, with well-validated factors like cognitive disengagement syndrome (CDS), executive function (EF), age, sex, and race an…	adhd - hyperactivity - hyperactivity disorder - deficit hyperactivity disorder - deficit hyperactivity - attention deficit - attention deficit hyperactivity - deficit - disorder adhd - hyperactivity disorder adhd - attention - children - children adhd - adult adhd - adhd symptoms - disorder - adult - adhd diagnosis - symptoms - diagnosis	1	FALSE	Article	neural network; machine learning; attention deficit; hyperactivity; artificial intelligence	2023	5	FRONTIERS IN PSYCHOLOGY
Next-generation deep learning based on simulators and synthetic data	0	0_language_cognitive_word_computational	Topic1-Human Cognitive Science	['language', 'cognitive', 'word', 'computational', 'neural', 'human', 'representations', 'models', 'cognition', 'knowledge', 'model', 'semantic', 'artificial', 'learning', 'words', 'information', 'cognitive science', 'reasoning', 'representation', 'intelligence']	['Artificial intelligence, human cognition, and conscious supremacy. The computational significance of consciousness is an important and potentially more tractable research theme than the hard problem of consciousness, as one could look at the correlation of consciousness and computational capacities through, e.g., algorithmic or complexity analyses. In the literature, consciousness is defined as…	language - cognitive - word - computational - neural - human - representations - models - cognition - knowledge - model - semantic - artificial - learning - words - information - cognitive science - reasoning - representation - intelligence	0.243188	FALSE	Review		2022	61	TRENDS IN COGNITIVE SCIENCES
What's next: recruitment of a grounded predictive body model for planning a robot's actions	0	0_language_cognitive_word_computational	Topic1-Human Cognitive Science	['language', 'cognitive', 'word', 'computational', 'neural', 'human', 'representations', 'models', 'cognition', 'knowledge', 'model', 'semantic', 'artificial', 'learning', 'words', 'information', 'cognitive science', 'reasoning', 'representation', 'intelligence']	['Artificial intelligence, human cognition, and conscious supremacy. The computational significance of consciousness is an important and potentially more tractable research theme than the hard problem of consciousness, as one could look at the correlation of consciousness and computational capacities through, e.g., algorithmic or complexity analyses. In the literature, consciousness is defined as…	language - cognitive - word - computational - neural - human - representations - models - cognition - knowledge - model - semantic - artificial - learning - words - information - cognitive science - reasoning - representation - intelligence	1	FALSE	Article	prediction; anticipation; recurrent neural network; internal body model; internal simulation; minimal cognitive system; robotic architecture	2012	15	FRONTIERS IN PSYCHOLOGY
Understanding Human Object Vision: A Picture Is Worth a Thousand Representations	14	14_visual_object_objects_category	Topic11-Visual Processing Mechanism and Modeling	['visual', 'object', 'objects', 'category', 'scene', 'image', 'images', 'vision', 'similarity', 'categorization', 'representations', 'shape', 'categories', 'stimuli', 'scenes', 'neural', 'cnns', 'recognition', 'memory', 'networks']	['A failure to learn object shape geometry: Implications for convolutional neural networks as plausible models of biological vision. Here we examine the plausibility of deep convolutional neural networks (CNNs) as a theoretical framework for understanding biological vision in the context of image classification. Recent work on object recognition in human vision has shown that both global, and loc…	visual - object - objects - category - scene - image - images - vision - similarity - categorization - representations - shape - categories - stimuli - scenes - neural - cnns - recognition - memory - networks	0.666614	FALSE	Review	object recognition; visual cortex; object representations; deep convolutional neural networks; DCNNs; behavior	2023	26	ANNUAL REVIEW OF PSYCHOLOGY
Metamorphic malicious code behavior detection using probabilistic inference methods	-1	-1_ocd_gut_gambling_delirium	NOISE	['ocd', 'gut', 'gambling', 'delirium', 'microbiota', 'obsessive', 'obsessive compulsive', 'compulsive', 'gut microbiota', 'patients', 'obsessive compulsive disorder', 'compulsive disorder', 'microbiome', 'igd', 'speech', 'violent', 'risk', 'machine learning', 'machine', 'using']	['Data-driven identification of subtypes of executive function across typical development, attention deficit hyperactivity disorder, and autism spectrum disorders. Background Impairment of executive function (EF), the goal-directed regulation of thoughts, actions, and emotions, drives negative outcomes and is common across neurodevelopmental disorders including attention deficit hyperactivity dis…	ocd - gut - gambling - delirium - microbiota - obsessive - obsessive compulsive - compulsive - gut microbiota - patients - obsessive compulsive disorder - compulsive disorder - microbiome - igd - speech - violent - risk - machine learning - machine - using	0.833394	FALSE	Article	Malicious code; Probabilistic inference; Markov logic networks; Malicious behavior patterns	2019	14	COGNITIVE SYSTEMS RESEARCH
An Open-Source Relational Network Derivation Script in R for Modeling and Visualizing Complex Behavior for Scientists and Practitioners	0	0_language_cognitive_word_computational	Topic1-Human Cognitive Science	['language', 'cognitive', 'word', 'computational', 'neural', 'human', 'representations', 'models', 'cognition', 'knowledge', 'model', 'semantic', 'artificial', 'learning', 'words', 'information', 'cognitive science', 'reasoning', 'representation', 'intelligence']	['Artificial intelligence, human cognition, and conscious supremacy. The computational significance of consciousness is an important and potentially more tractable research theme than the hard problem of consciousness, as one could look at the correlation of consciousness and computational capacities through, e.g., algorithmic or complexity analyses. In the literature, consciousness is defined as…	language - cognitive - word - computational - neural - human - representations - models - cognition - knowledge - model - semantic - artificial - learning - words - information - cognitive science - reasoning - representation - intelligence	0.153403	FALSE	Article	relational networks; R; graph networks; relational derivation; relational frame theory	2022	4	FRONTIERS IN PSYCHOLOGY
Deep learning dives: Predicting anxiety in zebrafish through novel tank assay analysis	1	1_depression_treatment_health_covid	Topic2-AI Assisted Depression Treatment	['depression', 'treatment', 'health', 'covid', 'anxiety', 'covid 19', '19', 'pandemic', 'mental', 'depressive', 'antidepressant', 'symptoms', 'predictors', 'machine learning', 'mental health', 'clinical', 'machine', 'psychiatric', 'patients', 'prediction']	['Mental health after the COVID-19 pandemic among Finnish youth: a repeated, cross-sectional, population-based study. Background High levels of mental health problems among young people were reported during the COVID-19 pandemic, but studies of the post-pandemic period are scarce. We assessed mental health problems among Finnish youth before, during, and after the COVID-19 pandemic using nationwi…	depression - treatment - health - covid - anxiety - covid 19 - 19 - pandemic - mental - depressive - antidepressant - symptoms - predictors - machine learning - mental health - clinical - machine - psychiatric - patients - prediction	0.0873102	FALSE	Article	Behavioral neuroscience; Zebrafish; Stress; Anxiety; Novel tank diving (NTD) test; DeepLabCut; Deep learning; Convolutional Neural Network (CNN)	2024	2	PHYSIOLOGY & BEHAVIOR
Concussion coach for postconcussive symptoms: a randomized, controlled trial of a smartphone application with Afghanistan and Iraq war Veterans	19	19_ptsd_trauma_stress disorder_posttraumatic	Topic15-PTSD Detection	['ptsd', 'trauma', 'stress disorder', 'posttraumatic', 'stress', 'posttraumatic stress', 'traumatic', 'symptoms', 'posttraumatic stress disorder', 'childhood', 'stress disorder ptsd', 'disorder ptsd', 'abuse', 'maltreatment', 'traumatic stress', 'exposure', 'post traumatic', 'disorder', 'veterans', 'post traumatic stress']	['Hippocampal Resting-State Functional Connectivity Forecasts Individual Posttraumatic Stress Disorder Symptoms: A Data-Driven Approach. BACKGROUND: Posttraumatic stress disorder (PTSD) is a debilitating disorder, and there is no current accurate prediction of who develops it after trauma. Neurobiologically, individuals with chronic PTSD exhibit aberrant resting-state functional connectivity (rsF…	ptsd - trauma - stress disorder - posttraumatic - stress - posttraumatic stress - traumatic - symptoms - posttraumatic stress disorder - childhood - stress disorder ptsd - disorder ptsd - abuse - maltreatment - traumatic stress - exposure - post traumatic - disorder - veterans - post traumatic stress	0.403004	FALSE	Article	TBI; Veterans Health Administration; postconcussive; mobile application; smart phone; rehabilitation; Bayesian network	2022	9	CLINICAL NEUROPSYCHOLOGIST
How Accurately Does the Information on Motor Development Collected During Health Checkups for Infants Predict the Diagnosis of Neurodevelopmental Disorders? - A Bayesian Network Model-Based Study	7	7_asd_autism_autism spectrum_autism spectrum disorder	Topic12-Autism Detection	['asd', 'autism', 'autism spectrum', 'autism spectrum disorder', 'spectrum disorder', 'spectrum', 'children', 'autistic', 'spectrum disorder asd', 'disorder asd', 'children asd', 'disorder', 'td', 'children autism', 'individuals asd', 'neurodevelopmental', 'social', 'typically developing', 'children autism spectrum', 'toddlers']	['Aberrant Functional Connectivity of Neural Circuits Associated with Social and Sensorimotor Deficits in Young Children with Autism Spectrum Disorder. Autism spectrum disorder (ASD) is a neurodevelopmental disorder characterized by atypical functional integration of brain regions. The vast majority of neuroimaging studies of ASD have focused on older children, adolescents, and adults with the di…	asd - autism - autism spectrum - autism spectrum disorder - spectrum disorder - spectrum - children - autistic - spectrum disorder asd - disorder asd - children asd - disorder - td - children autism - individuals asd - neurodevelopmental - social - typically developing - children autism spectrum - toddlers	0.0332853	FALSE	Article	early symptomatic syndromes eliciting neurodevelopmental clinical examinations; early screening; child health checkups; receiver operating characteristic; area under the curve; posterior probability	2022	3	NEUROPSYCHIATRIC DISEASE AND TREATMENT
A sustainable artificial intelligence facilities management outsourcing relationships system: Case studies	16	16_employees_job_employee_ai	Topic18-AI in Organizational Management	['employees', 'job', 'employee', 'ai', 'organizational', 'management', 'organizations', 'hrm', 'leadership', 'career', 'work', 'workplace', 'human resource', 'artificial intelligence', 'intelligence', 'hr', 'artificial', 'technology', 'innovation', 'coaching']	["Job attitudes and career behaviors relating to employees' perceived incorporation of artificial intelligence in the workplace: a career self-management perspective. Purpose Artificial intelligence (AI) continues to be deployed in workplaces. While there are many positive outcomes of AI integration, understanding the extent of its consequences on employees is limited. Hence, this study examines …	employees - job - employee - ai - organizational - management - organizations - hrm - leadership - career - work - workplace - human resource - artificial intelligence - intelligence - hr - artificial - technology - innovation - coaching	0.173479	FALSE	Article	artificial neural networks (ANNs); facilities management outsourcing relationships system; facilities management strategies; outsourcing categories; CORE model; sustainability	2022	7	FRONTIERS IN PSYCHOLOGY
Estimating the Symptom Structure of Bipolar Disorder via Network Analysis: Energy Dysregulation as a Central Symptom	19	19_ptsd_trauma_stress disorder_posttraumatic	Topic15-PTSD Detection	['ptsd', 'trauma', 'stress disorder', 'posttraumatic', 'stress', 'posttraumatic stress', 'traumatic', 'symptoms', 'posttraumatic stress disorder', 'childhood', 'stress disorder ptsd', 'disorder ptsd', 'abuse', 'maltreatment', 'traumatic stress', 'exposure', 'post traumatic', 'disorder', 'veterans', 'post traumatic stress']	['Hippocampal Resting-State Functional Connectivity Forecasts Individual Posttraumatic Stress Disorder Symptoms: A Data-Driven Approach. BACKGROUND: Posttraumatic stress disorder (PTSD) is a debilitating disorder, and there is no current accurate prediction of who develops it after trauma. Neurobiologically, individuals with chronic PTSD exhibit aberrant resting-state functional connectivity (rsF…	ptsd - trauma - stress disorder - posttraumatic - stress - posttraumatic stress - traumatic - symptoms - posttraumatic stress disorder - childhood - stress disorder ptsd - disorder ptsd - abuse - maltreatment - traumatic stress - exposure - post traumatic - disorder - veterans - post traumatic stress	0.079337	FALSE	Article	Bayesian networks; bipolar disorder; directed acyclic graph; Gaussian graphical models; network analysis	2022	34	JOURNAL OF PSYCHOPATHOLOGY AND CLINICAL SCIENCE
A quasi-comprehensive exploration of the mechanisms of spatial working memory	14	14_visual_object_objects_category	Topic11-Visual Processing Mechanism and Modeling	['visual', 'object', 'objects', 'category', 'scene', 'image', 'images', 'vision', 'similarity', 'categorization', 'representations', 'shape', 'categories', 'stimuli', 'scenes', 'neural', 'cnns', 'recognition', 'memory', 'networks']	['A failure to learn object shape geometry: Implications for convolutional neural networks as plausible models of biological vision. Here we examine the plausibility of deep convolutional neural networks (CNNs) as a theoretical framework for understanding biological vision in the context of image classification. Recent work on object recognition in human vision has shown that both global, and loc…	visual - object - objects - category - scene - image - images - vision - similarity - categorization - representations - shape - categories - stimuli - scenes - neural - cnns - recognition - memory - networks	0.308724	FALSE	Article		2023	10	NATURE HUMAN BEHAVIOUR
An Empirical and Computational Investigation of Perceiving and Remembering Event Temporal Relations	0	0_language_cognitive_word_computational	Topic1-Human Cognitive Science	['language', 'cognitive', 'word', 'computational', 'neural', 'human', 'representations', 'models', 'cognition', 'knowledge', 'model', 'semantic', 'artificial', 'learning', 'words', 'information', 'cognitive science', 'reasoning', 'representation', 'intelligence']	['Artificial intelligence, human cognition, and conscious supremacy. The computational significance of consciousness is an important and potentially more tractable research theme than the hard problem of consciousness, as one could look at the correlation of consciousness and computational capacities through, e.g., algorithmic or complexity analyses. In the literature, consciousness is defined as…	language - cognitive - word - computational - neural - human - representations - models - cognition - knowledge - model - semantic - artificial - learning - words - information - cognitive science - reasoning - representation - intelligence	0.148372	FALSE	Article	Event temporal relations; Event representations; Event boundary; Event breakpoint; Knowledge representations; Recurrent neural network; End states; Beginning states; Overlap heuristic	2009	6	COGNITIVE SCIENCE
Dynamical Systems Interpretation of Reversal of Subjective Temporal Order Due to Arm Crossing	0	0_language_cognitive_word_computational	Topic1-Human Cognitive Science	['language', 'cognitive', 'word', 'computational', 'neural', 'human', 'representations', 'models', 'cognition', 'knowledge', 'model', 'semantic', 'artificial', 'learning', 'words', 'information', 'cognitive science', 'reasoning', 'representation', 'intelligence']	['Artificial intelligence, human cognition, and conscious supremacy. The computational significance of consciousness is an important and potentially more tractable research theme than the hard problem of consciousness, as one could look at the correlation of consciousness and computational capacities through, e.g., algorithmic or complexity analyses. In the literature, consciousness is defined as…	language - cognitive - word - computational - neural - human - representations - models - cognition - knowledge - model - semantic - artificial - learning - words - information - cognitive science - reasoning - representation - intelligence	0.523541	FALSE	Article	temporal order judgment; body image; dynamical system	2010	3	ADAPTIVE BEHAVIOR
Active and semi-supervised learning for object detection with imperfect data	14	14_visual_object_objects_category	Topic11-Visual Processing Mechanism and Modeling	['visual', 'object', 'objects', 'category', 'scene', 'image', 'images', 'vision', 'similarity', 'categorization', 'representations', 'shape', 'categories', 'stimuli', 'scenes', 'neural', 'cnns', 'recognition', 'memory', 'networks']	['A failure to learn object shape geometry: Implications for convolutional neural networks as plausible models of biological vision. Here we examine the plausibility of deep convolutional neural networks (CNNs) as a theoretical framework for understanding biological vision in the context of image classification. Recent work on object recognition in human vision has shown that both global, and loc…	visual - object - objects - category - scene - image - images - vision - similarity - categorization - representations - shape - categories - stimuli - scenes - neural - cnns - recognition - memory - networks	0.176213	FALSE	Article	Active Learning (AL); Semi-Supervised Learning (SSL); Convolutional Neural Network (CNN); Deep learning; Object detection	2017	40	COGNITIVE SYSTEMS RESEARCH
Psychological Education Health Assessment Problems Based on Improved Constructive Neural Network	25	25_nlp_language_health_natural language processing	Topic19-NLP-based Mental Health Assessment	['nlp', 'language', 'health', 'natural language processing', 'natural language', 'language processing', 'mental health', 'mental', 'chatgpt', 'natural', 'loneliness', 'clinical', 'processing', 'llms', 'text', 'psychotherapy', 'speech', 'processing nlp', 'language processing nlp', 'gpt']	["Predicting Patients' Satisfaction With Mental Health Drug Treatment Using Their Reviews: Unified Interchangeable Model Fusion Approach. Background: After the COVID-19 pandemic, the conflict between limited mental health care resources and the rapidly growing number of patients has become more pronounced. It is necessary for psychologists to borrow artificial intelligence (AI)-based methods to a…	nlp - language - health - natural language processing - natural language - language processing - mental health - mental - chatgpt - natural - loneliness - clinical - processing - llms - text - psychotherapy - speech - processing nlp - language processing nlp - gpt	0.176691	FALSE	Article	LIWC dictionary; CNN; mental health assessment; assessment; psychological	2022	1	FRONTIERS IN PSYCHOLOGY
Tasks for aligning human and machine planning	0	0_language_cognitive_word_computational	Topic1-Human Cognitive Science	['language', 'cognitive', 'word', 'computational', 'neural', 'human', 'representations', 'models', 'cognition', 'knowledge', 'model', 'semantic', 'artificial', 'learning', 'words', 'information', 'cognitive science', 'reasoning', 'representation', 'intelligence']	['Artificial intelligence, human cognition, and conscious supremacy. The computational significance of consciousness is an important and potentially more tractable research theme than the hard problem of consciousness, as one could look at the correlation of consciousness and computational capacities through, e.g., algorithmic or complexity analyses. In the literature, consciousness is defined as…	language - cognitive - word - computational - neural - human - representations - models - cognition - knowledge - model - semantic - artificial - learning - words - information - cognitive science - reasoning - representation - intelligence	0.271916	FALSE	Review		2019	12	CURRENT OPINION IN BEHAVIORAL SCIENCES
Transformers deep learning models for missing data imputation: an application of the ReMasker model on a psychometric scale	18	18_item_simulation_missing_dif	Topic16-ML in Psychometrics	['item', 'simulation', 'missing', 'dif', 'data', 'imputation', 'methods', 'method', 'missing data', 'variables', 'mathematics', 'reading', 'pisa', 'bayesian', 'machine learning', 'modeling', 'items', 'model', 'approach', 'estimation']	['One Model to Rule Them All? Using Machine Learning Algorithms to Determine the Number of Factors in Exploratory Factor Analysis. Determining the number of factors is one of the most crucial decisions a researcher has to face when conducting an exploratory factor analysis. As no common factor retention criterion can be seen as generally superior, a new approach is proposed-combining extensive da…	item - simulation - missing - dif - data - imputation - methods - method - missing data - variables - mathematics - reading - pisa - bayesian - machine learning - modeling - items - model - approach - estimation	1	FALSE	Article	missing data; machine learning; artificial intelligence; deep learning; psychometrics	2024	0	FRONTIERS IN PSYCHOLOGY
Learning the Form of Causal Relationships Using Hierarchical Bayesian Models	0	0_language_cognitive_word_computational	Topic1-Human Cognitive Science	['language', 'cognitive', 'word', 'computational', 'neural', 'human', 'representations', 'models', 'cognition', 'knowledge', 'model', 'semantic', 'artificial', 'learning', 'words', 'information', 'cognitive science', 'reasoning', 'representation', 'intelligence']	['Artificial intelligence, human cognition, and conscious supremacy. The computational significance of consciousness is an important and potentially more tractable research theme than the hard problem of consciousness, as one could look at the correlation of consciousness and computational capacities through, e.g., algorithmic or complexity analyses. In the literature, consciousness is defined as…	language - cognitive - word - computational - neural - human - representations - models - cognition - knowledge - model - semantic - artificial - learning - words - information - cognitive science - reasoning - representation - intelligence	0.0942294	FALSE	Article	Causal reasoning; Bayesian networks; Bayesian models; Hierarchical models; Rational inference; Structure learning; Human experimentation; Computer simulation	2010	62	COGNITIVE SCIENCE
Visuomotor characterization of eye movements in a drawing task	14	14_visual_object_objects_category	Topic11-Visual Processing Mechanism and Modeling	['visual', 'object', 'objects', 'category', 'scene', 'image', 'images', 'vision', 'similarity', 'categorization', 'representations', 'shape', 'categories', 'stimuli', 'scenes', 'neural', 'cnns', 'recognition', 'memory', 'networks']	['A failure to learn object shape geometry: Implications for convolutional neural networks as plausible models of biological vision. Here we examine the plausibility of deep convolutional neural networks (CNNs) as a theoretical framework for understanding biological vision in the context of image classification. Recent work on object recognition in human vision has shown that both global, and loc…	visual - object - objects - category - scene - image - images - vision - similarity - categorization - representations - shape - categories - stimuli - scenes - neural - cnns - recognition - memory - networks	1	FALSE	Article	Visuomotor; Drawing; Bayesian	2009	28	VISION RESEARCH
Predicting regulatory activities for socially shared regulation to optimize collaborative learning	2	2_students_teaching_education_teachers	Topic4-AI in Educational Psychology	['students', 'teaching', 'education', 'teachers', 'learning', 'educational', 'student', 'academic', 'ai', 'writing', 'college', 'learners', 'literacy', 'deep', 'deep learning', 'college students', 'classroom', 'motivation', 'teacher', 'english']	["Relationship between teacher's ability model and students' behavior based on emotion-behavior relevance theory and artificial intelligence technology under the background of curriculum ideological and political education. Purpose: This paper aims to fully understand the relationship between students' classroom emotions and teachers' behaviors in the teaching environment, provide personalized te…	students - teaching - education - teachers - learning - educational - student - academic - ai - writing - college - learners - literacy - deep - deep learning - college students - classroom - motivation - teacher - english	1	FALSE	Article	Socially shared regulation; Collaborative learning; Multimodal data; Physiological signal; Episode rule mining; Artificial intelligence (AI)	2023	27	COMPUTERS IN HUMAN BEHAVIOR
Deep Learning Imputation for Asymmetric and Incomplete Likert-Type Items	18	18_item_simulation_missing_dif	Topic16-ML in Psychometrics	['item', 'simulation', 'missing', 'dif', 'data', 'imputation', 'methods', 'method', 'missing data', 'variables', 'mathematics', 'reading', 'pisa', 'bayesian', 'machine learning', 'modeling', 'items', 'model', 'approach', 'estimation']	['One Model to Rule Them All? Using Machine Learning Algorithms to Determine the Number of Factors in Exploratory Factor Analysis. Determining the number of factors is one of the most crucial decisions a researcher has to face when conducting an exploratory factor analysis. As no common factor retention criterion can be seen as generally superior, a new approach is proposed-combining extensive da…	item - simulation - missing - dif - data - imputation - methods - method - missing data - variables - mathematics - reading - pisa - bayesian - machine learning - modeling - items - model - approach - estimation	1	FALSE	Article	artificial neural networks; gradient descent; imputation; regularization	2024	2	JOURNAL OF EDUCATIONAL AND BEHAVIORAL STATISTICS
Relationship between gaming disorder across various dimensions among PUBG players: a machine learning-based cross-sectional study	-1	-1_ocd_gut_gambling_delirium	NOISE	['ocd', 'gut', 'gambling', 'delirium', 'microbiota', 'obsessive', 'obsessive compulsive', 'compulsive', 'gut microbiota', 'patients', 'obsessive compulsive disorder', 'compulsive disorder', 'microbiome', 'igd', 'speech', 'violent', 'risk', 'machine learning', 'machine', 'using']	['Data-driven identification of subtypes of executive function across typical development, attention deficit hyperactivity disorder, and autism spectrum disorders. Background Impairment of executive function (EF), the goal-directed regulation of thoughts, actions, and emotions, drives negative outcomes and is common across neurodevelopmental disorders including attention deficit hyperactivity dis…	ocd - gut - gambling - delirium - microbiota - obsessive - obsessive compulsive - compulsive - gut microbiota - patients - obsessive compulsive disorder - compulsive disorder - microbiome - igd - speech - violent - risk - machine learning - machine - using	0.881345	FALSE	Article	addiction; gaming disorder; cultivation effect; machine learning approach; behavior; health and wellness; religion	2023	0	FRONTIERS IN PSYCHIATRY
Exploring the Intra Entrepreneurship-Employee Engagement-Creativity Linkage and the Diverse Effects of Gender and Marital Status	16	16_employees_job_employee_ai	Topic18-AI in Organizational Management	['employees', 'job', 'employee', 'ai', 'organizational', 'management', 'organizations', 'hrm', 'leadership', 'career', 'work', 'workplace', 'human resource', 'artificial intelligence', 'intelligence', 'hr', 'artificial', 'technology', 'innovation', 'coaching']	["Job attitudes and career behaviors relating to employees' perceived incorporation of artificial intelligence in the workplace: a career self-management perspective. Purpose Artificial intelligence (AI) continues to be deployed in workplaces. While there are many positive outcomes of AI integration, understanding the extent of its consequences on employees is limited. Hence, this study examines …	employees - job - employee - ai - organizational - management - organizations - hrm - leadership - career - work - workplace - human resource - artificial intelligence - intelligence - hr - artificial - technology - innovation - coaching	0.10252	FALSE	Article	entrepreneurship; creativity; engagement; corporate social responsibility; SMEs	2021	18	FRONTIERS IN PSYCHOLOGY
Improving sentiment classification using a RoBERTa-based hybrid model	3	3_personality_media_sentiment_social	Topic3-ML-based Personality Assessment	['personality', 'media', 'sentiment', 'social', 'social media', 'text', 'language', 'twitter', 'big', 'online', 'users', 'sentiment analysis', 'traits', 'natural language', 'news', 'content', 'public', 'analysis', 'data', 'psychological']	["Exploring a Language-Based Interest Assessment: Predicting Vocational Interests on Social Media Using Natural Language Processing. For more than a century, self-report inventories have been the traditional method for assessing vocational interests. Little research has examined the use of machine learning techniques, such as natural language processing (NLP), in interest assessment. This paper e…	personality - media - sentiment - social - social media - text - language - twitter - big - online - users - sentiment analysis - traits - natural language - news - content - public - analysis - data - psychological	0.0698723	FALSE	Article	sentiment analysis; word embedding; RoBERTa; SMOTE; LSTM; CNN plus LSTM	2023	5	FRONTIERS IN HUMAN NEUROSCIENCE
The Use of Deep Learning and VR Technology in Film and Television Production From the Perspective of Audience Psychology	-1	-1_ocd_gut_gambling_delirium	NOISE	['ocd', 'gut', 'gambling', 'delirium', 'microbiota', 'obsessive', 'obsessive compulsive', 'compulsive', 'gut microbiota', 'patients', 'obsessive compulsive disorder', 'compulsive disorder', 'microbiome', 'igd', 'speech', 'violent', 'risk', 'machine learning', 'machine', 'using']	['Data-driven identification of subtypes of executive function across typical development, attention deficit hyperactivity disorder, and autism spectrum disorders. Background Impairment of executive function (EF), the goal-directed regulation of thoughts, actions, and emotions, drives negative outcomes and is common across neurodevelopmental disorders including attention deficit hyperactivity dis…	ocd - gut - gambling - delirium - microbiota - obsessive - obsessive compulsive - compulsive - gut microbiota - patients - obsessive compulsive disorder - compulsive disorder - microbiome - igd - speech - violent - risk - machine learning - machine - using	0.822235	FALSE	Article	AI technology; convolutional neural network; film and TV production; Computer Graphics; human-computer interaction	2021	6	FRONTIERS IN PSYCHOLOGY
Polyphenic risk score shows robust predictive ability for long-term future suicidality	4	4_suicide_suicidal_risk_suicide risk	Topic7-Suicide Prediction	['suicide', 'suicidal', 'risk', 'suicide risk', 'ideation', 'suicidal ideation', 'suicide attempts', 'attempts', 'suicide attempt', 'attempt', 'posts', 'health', 'si', 'suicidality', 'prevention', 'suicide prevention', 'self harm', 'death', 'risk suicide', 'suicidal behavior']	["Prediction of Sex-Specific Suicide Risk Using Machine Learning and Single-Payer Health Care Registry Data From Denmark. IMPORTANCE Suicide is a public health problem, with multiple causes that are poorly understood. The increased focus on combining health care data with machine-learning approaches in psychiatry may help advance the understanding of suicide risk. OBJECTIVE To examine sex-specifi…	suicide - suicidal - risk - suicide risk - ideation - suicidal ideation - suicide attempts - attempts - suicide attempt - attempt - posts - health - si - suicidality - prevention - suicide prevention - self harm - death - risk suicide - suicidal behavior	1	FALSE	Article	Suicidality; Emergency department; Risk; Prediction; Machine learning; Social Isolation	2022	2	DISCOVER MENTAL HEALTH
Additive effects of serotonergic and dopaminergic polymorphisms on trait impulsivity	26	26_adhd_hyperactivity_hyperactivity disorder_deficit hyperactivity disorder	Topic27-ADHD Detection	['adhd', 'hyperactivity', 'hyperactivity disorder', 'deficit hyperactivity disorder', 'deficit hyperactivity', 'attention deficit', 'attention deficit hyperactivity', 'deficit', 'disorder adhd', 'hyperactivity disorder adhd', 'attention', 'children', 'children adhd', 'adult adhd', 'adhd symptoms', 'disorder', 'adult', 'adhd diagnosis', 'symptoms', 'diagnosis']	['Application and Expansion of an Algorithm Predicting Attention-Deficit/Hyperactivity Disorder and Impairment in a Predominantly White Sample. Current assessment protocols for attention-deficit/hyperactivity disorder (ADHD) focus heavily on a set of highly overlapping symptoms, with well-validated factors like cognitive disengagement syndrome (CDS), executive function (EF), age, sex, and race an…	adhd - hyperactivity - hyperactivity disorder - deficit hyperactivity disorder - deficit hyperactivity - attention deficit - attention deficit hyperactivity - deficit - disorder adhd - hyperactivity disorder adhd - attention - children - children adhd - adult adhd - adhd symptoms - disorder - adult - adhd diagnosis - symptoms - diagnosis	0.376844	FALSE	Article	individual differences; impulsivity trait; dopamine D4 receptor; serotonin receptor; HTR1B	2012	48	AMERICAN JOURNAL OF MEDICAL GENETICS PART B-NEUROPSYCHIATRIC GENETICS
Stigmergic epistemology, stigmergic cognition	11	11_trust_ai_human_moral	Topic5-Trust in AI	['trust', 'ai', 'human', 'moral', 'agents', 'intelligence', 'artificial intelligence', 'artificial', 'humans', 'decision', 'team', 'robots', 'systems', 'teams', 'agent', 'people', 'xai', 'human ai', 'artificial intelligence ai', 'intelligence ai']	["When combinations of humans and AI are useful: A systematic review and meta-analysis. Inspired by the increasing use of artificial intelligence (AI) to augment humans, researchers have studied human-AI systems involving different tasks, systems and populations. Despite such a large body of work, we lack a broad conceptual understanding of when combinations of humans and AI are better than eithe…	trust - ai - human - moral - agents - intelligence - artificial intelligence - artificial - humans - decision - team - robots - systems - teams - agent - people - xai - human ai - artificial intelligence ai - intelligence ai	0.088891	FALSE	Article	stigmergy; social epistemology; extended mind; social cognition; particle swarm optimization	2008	103	COGNITIVE SYSTEMS RESEARCH
Measuring Engagement in Robot-Assisted Therapy for Autistic Children	7	7_asd_autism_autism spectrum_autism spectrum disorder	Topic12-Autism Detection	['asd', 'autism', 'autism spectrum', 'autism spectrum disorder', 'spectrum disorder', 'spectrum', 'children', 'autistic', 'spectrum disorder asd', 'disorder asd', 'children asd', 'disorder', 'td', 'children autism', 'individuals asd', 'neurodevelopmental', 'social', 'typically developing', 'children autism spectrum', 'toddlers']	['Aberrant Functional Connectivity of Neural Circuits Associated with Social and Sensorimotor Deficits in Young Children with Autism Spectrum Disorder. Autism spectrum disorder (ASD) is a neurodevelopmental disorder characterized by atypical functional integration of brain regions. The vast majority of neuroimaging studies of ASD have focused on older children, adolescents, and adults with the di…	asd - autism - autism spectrum - autism spectrum disorder - spectrum disorder - spectrum - children - autistic - spectrum disorder asd - disorder asd - children asd - disorder - td - children autism - individuals asd - neurodevelopmental - social - typically developing - children autism spectrum - toddlers	1	FALSE	Article	robot; autism; therapy; engagement detection; facial emotion recognition; convolutional neural network	2023	4	BEHAVIORAL SCIENCES
A machine learning approach for analyzing sexual satisfaction based on psychological features	3	3_personality_media_sentiment_social	Topic3-ML-based Personality Assessment	['personality', 'media', 'sentiment', 'social', 'social media', 'text', 'language', 'twitter', 'big', 'online', 'users', 'sentiment analysis', 'traits', 'natural language', 'news', 'content', 'public', 'analysis', 'data', 'psychological']	["Exploring a Language-Based Interest Assessment: Predicting Vocational Interests on Social Media Using Natural Language Processing. For more than a century, self-report inventories have been the traditional method for assessing vocational interests. Little research has examined the use of machine learning techniques, such as natural language processing (NLP), in interest assessment. This paper e…	personality - media - sentiment - social - social media - text - language - twitter - big - online - users - sentiment analysis - traits - natural language - news - content - public - analysis - data - psychological	0.0945679	FALSE	Article; Early Access	Supervised learning; Sexual satisfaction; Sexual functioning; Personality; Dark Triad	2024	0	CURRENT PSYCHOLOGY
Measuring problem solving skills via stealth assessment in an engaging video game	2	2_students_teaching_education_teachers	Topic4-AI in Educational Psychology	['students', 'teaching', 'education', 'teachers', 'learning', 'educational', 'student', 'academic', 'ai', 'writing', 'college', 'learners', 'literacy', 'deep', 'deep learning', 'college students', 'classroom', 'motivation', 'teacher', 'english']	["Relationship between teacher's ability model and students' behavior based on emotion-behavior relevance theory and artificial intelligence technology under the background of curriculum ideological and political education. Purpose: This paper aims to fully understand the relationship between students' classroom emotions and teachers' behaviors in the teaching environment, provide personalized te…	students - teaching - education - teachers - learning - educational - student - academic - ai - writing - college - learners - literacy - deep - deep learning - college students - classroom - motivation - teacher - english	0.119232	FALSE	Article	Problem solving skills; Stealth assessment; Validity	2016	155	COMPUTERS IN HUMAN BEHAVIOR
Deep Learning-Based Artistic Inheritance and Cultural Emotion Color Dissemination of Qin Opera	22	22_creativity_creative_art_aesthetic	Topic26-AI in Creativity Research	['creativity', 'creative', 'art', 'aesthetic', 'artworks', 'ai', 'human', 'human creativity', 'artwork', 'divergent', 'artistic', 'image', 'originality', 'thinking', 'semantic distance', 'painting', 'artists', 'paintings', 'creative process', 'literary']	["Art therapy to control nail biting using a cognitive behavioral approach through new innovative game and animation. BackgroundNail biting is categorized as a habitual behavior, commonly observed in children and occasionally in adults. This disorder occurs unconsciously, with individuals often unaware of their behavior. Since there are physical and psychological complications and quality of life…	creativity - creative - art - aesthetic - artworks - ai - human - human creativity - artwork - divergent - artistic - image - originality - thinking - semantic distance - painting - artists - paintings - creative process - literary	0.246664	FALSE	Article	Qin opera; deep learning; emotion; attention model; residual network	2022	0	FRONTIERS IN PSYCHOLOGY
Data mining classification techniques: an application to tobacco consumption in teenagers	9	9_alcohol_substance_eating_use	Topic14-Substance Abuse Prediction	['alcohol', 'substance', 'eating', 'use', 'substance use', 'drinking', 'cannabis', 'alcohol use', 'use disorder', 'aud', 'binge', 'opioid', 'dependence', 'treatment', 'smoking', 'overdose', 'consumption', 'addiction', 'drug', 'binge eating']	['The prediction of resilience to alcohol consumption in youths: insular and subcallosal cingulate myeloarchitecture. Background The prediction of alcohol consumption in youths and particularly biomarkers of resilience, is critical for early intervention to reduce the risk of subsequent harmful alcohol use. Methods At baseline, the longitudinal relaxation rate (R1), indexing grey matter myelinati…	alcohol - substance - eating - use - substance use - drinking - cannabis - alcohol use - use disorder - aud - binge - opioid - dependence - treatment - smoking - overdose - consumption - addiction - drug - binge eating	0.605428	FALSE	Article	Artificial neural networks; nicotine; data mining; tobacco; logistic regression model; discriminant analysis	2014	4	ANALES DE PSICOLOGIA
Objective evaluation of interior noise booming in a passenger car based on sound metrics and artificial neural networks	6	6_facial_music_emotion_faces	Topic9-Affective Computing	['facial', 'music', 'emotion', 'faces', 'emotions', 'recognition', 'expressions', 'face', 'emotion recognition', 'emotional', 'musical', 'facial expressions', 'audio', 'eeg', 'expression', 'features', 'facial expression', 'affective', 'signals', 'valence']	["Facial Expression Emotion Recognition Model Integrating Philosophy and Machine Learning Theory. Facial expression emotion recognition is an intuitive reflection of a person's mental state, which contains rich emotional information, and is one of the most important forms of interpersonal communication. It can be used in various fields, including psychology. As a celebrity in ancient China, Zeng …	facial - music - emotion - faces - emotions - recognition - expressions - face - emotion recognition - emotional - musical - facial expressions - audio - eeg - expression - features - facial expression - affective - signals - valence	0.0678268	FALSE	Article	Booming; Sound metrics; Neural network; Car; Acceleration; Subjective evaluation	2009	48	APPLIED ERGONOMICS
Understanding Image Memorability	14	14_visual_object_objects_category	Topic11-Visual Processing Mechanism and Modeling	['visual', 'object', 'objects', 'category', 'scene', 'image', 'images', 'vision', 'similarity', 'categorization', 'representations', 'shape', 'categories', 'stimuli', 'scenes', 'neural', 'cnns', 'recognition', 'memory', 'networks']	['A failure to learn object shape geometry: Implications for convolutional neural networks as plausible models of biological vision. Here we examine the plausibility of deep convolutional neural networks (CNNs) as a theoretical framework for understanding biological vision in the context of image classification. Recent work on object recognition in human vision has shown that both global, and loc…	visual - object - objects - category - scene - image - images - vision - similarity - categorization - representations - shape - categories - stimuli - scenes - neural - cnns - recognition - memory - networks	1	FALSE	Review		2020	49	TRENDS IN COGNITIVE SCIENCES
The potential of convolutional neural networks for identifying neural states based on electrophysiological signals: experiments on synthetic and real patient data	17	17_bci_eeg_gaze_eye	Topic23-Brain-Computer Interface	['bci', 'eeg', 'gaze', 'eye', 'brain computer', 'signals', 'mi', 'fnirs', 'brain computer interface', 'classification', 'computer interface', 'signal', 'motor imagery', 'motor', 'bcis', 'computer', 'imagery', 'decoding', 'eeg signals', 'interface']	['Artificial Intelligence Algorithms in Visual Evoked Potential-Based Brain-Computer Interfaces for Motor Rehabilitation Applications: Systematic Review and Future Directions. Brain-Computer Interface (BCI) is a technology that uses electroencephalographic (EEG) signals to control external devices, such as Functional Electrical Stimulation (FES). Visual BCI paradigms based on P300 and Steady Stat…	bci - eeg - gaze - eye - brain computer - signals - mi - fnirs - brain computer interface - classification - computer interface - signal - motor imagery - motor - bcis - computer - imagery - decoding - eeg signals - interface	1	FALSE	Article	neural decoding; adaptive deep brain stimulation; brain-computer interface; convolutional neural networks; local field potentials; neural oscillations; signal processing; electrophysiology	2023	1	FRONTIERS IN HUMAN NEUROSCIENCE
Structural Resemblance to Emotional Expressions Predicts Evaluation of Emotionally Neutral Faces	6	6_facial_music_emotion_faces	Topic9-Affective Computing	['facial', 'music', 'emotion', 'faces', 'emotions', 'recognition', 'expressions', 'face', 'emotion recognition', 'emotional', 'musical', 'facial expressions', 'audio', 'eeg', 'expression', 'features', 'facial expression', 'affective', 'signals', 'valence']	["Facial Expression Emotion Recognition Model Integrating Philosophy and Machine Learning Theory. Facial expression emotion recognition is an intuitive reflection of a person's mental state, which contains rich emotional information, and is one of the most important forms of interpersonal communication. It can be used in various fields, including psychology. As a celebrity in ancient China, Zeng …	facial - music - emotion - faces - emotions - recognition - expressions - face - emotion recognition - emotional - musical - facial expressions - audio - eeg - expression - features - facial expression - affective - signals - valence	0.105717	FALSE	Article	social cognition; face perception; trait judgments; emotional expressions; computer vision	2009	266	EMOTION
Evaluation of Neural Degeneration Biomarkers in the Prefrontal Cortex for Early Identification of Patients With Mild Cognitive Impairment: An fNIRS Study	8	8_ad_dementia_mci_alzheimer	Topic10-Alzheimer Detection	['ad', 'dementia', 'mci', 'alzheimer', 'disease', 'alzheimer disease', 'age', 'cognitive impairment', 'brain age', 'brain', 'cognitive', 'impairment', 'aging', 'mild', 'mild cognitive', 'mild cognitive impairment', 'mri', 'aphasia', 'lesion', 'speech']	["Plasma d-glutamate levels for detecting mild cognitive impairment and Alzheimer's disease: Machine learning approaches. Background: d-glutamate, which is involved in N-methyl-d-aspartate receptor modulation, may be associated with cognitive ageing. Aims: This study aimed to use peripheral plasma d-glutamate levels to differentiate patients with mild cognitive impairment (MCI) and Alzheimer's di…	ad - dementia - mci - alzheimer - disease - alzheimer disease - age - cognitive impairment - brain age - brain - cognitive - impairment - aging - mild - mild cognitive - mild cognitive impairment - mri - aphasia - lesion - speech	0.152896	FALSE	Article	functional near-infrared spectroscopy (fNIRS); mild cognitive impairment (MCI); linear discriminant analysis (LDA); convolutional neural network (CNN); neural degeneration	2019	102	FRONTIERS IN HUMAN NEUROSCIENCE
An intelligent assessment method of criminal psychological attribution based on unbalance data	-1	-1_ocd_gut_gambling_delirium	NOISE	['ocd', 'gut', 'gambling', 'delirium', 'microbiota', 'obsessive', 'obsessive compulsive', 'compulsive', 'gut microbiota', 'patients', 'obsessive compulsive disorder', 'compulsive disorder', 'microbiome', 'igd', 'speech', 'violent', 'risk', 'machine learning', 'machine', 'using']	['Data-driven identification of subtypes of executive function across typical development, attention deficit hyperactivity disorder, and autism spectrum disorders. Background Impairment of executive function (EF), the goal-directed regulation of thoughts, actions, and emotions, drives negative outcomes and is common across neurodevelopmental disorders including attention deficit hyperactivity dis…	ocd - gut - gambling - delirium - microbiota - obsessive - obsessive compulsive - compulsive - gut microbiota - patients - obsessive compulsive disorder - compulsive disorder - microbiome - igd - speech - violent - risk - machine learning - machine - using	0.617813	FALSE	Article	Attribution classification of violent crime; B-TF-dIDF; Deep learning models; Text classification	2024	0	COMPUTERS IN HUMAN BEHAVIOR
Effect of smartphone use before bedtime on smartphone addiction behaviors among Chinese college students	3	3_personality_media_sentiment_social	Topic3-ML-based Personality Assessment	['personality', 'media', 'sentiment', 'social', 'social media', 'text', 'language', 'twitter', 'big', 'online', 'users', 'sentiment analysis', 'traits', 'natural language', 'news', 'content', 'public', 'analysis', 'data', 'psychological']	["Exploring a Language-Based Interest Assessment: Predicting Vocational Interests on Social Media Using Natural Language Processing. For more than a century, self-report inventories have been the traditional method for assessing vocational interests. Little research has examined the use of machine learning techniques, such as natural language processing (NLP), in interest assessment. This paper e…	personality - media - sentiment - social - social media - text - language - twitter - big - online - users - sentiment analysis - traits - natural language - news - content - public - analysis - data - psychological	0.0737852	FALSE	Article	problematic smartphone use; college students; sleep; smartphone addiction behavior; artificial neural network	2022	4	FRONTIERS IN PSYCHOLOGY
Visual Learning in Multisensory Environments	14	14_visual_object_objects_category	Topic11-Visual Processing Mechanism and Modeling	['visual', 'object', 'objects', 'category', 'scene', 'image', 'images', 'vision', 'similarity', 'categorization', 'representations', 'shape', 'categories', 'stimuli', 'scenes', 'neural', 'cnns', 'recognition', 'memory', 'networks']	['A failure to learn object shape geometry: Implications for convolutional neural networks as plausible models of biological vision. Here we examine the plausibility of deep convolutional neural networks (CNNs) as a theoretical framework for understanding biological vision in the context of image classification. Recent work on object recognition in human vision has shown that both global, and loc…	visual - object - objects - category - scene - image - images - vision - similarity - categorization - representations - shape - categories - stimuli - scenes - neural - cnns - recognition - memory - networks	0.272897	FALSE	Article	Visual perception; Multisensory perception; Learning; Bayesian modeling	2010	11	TOPICS IN COGNITIVE SCIENCE
An accurate and efficient multi-category edge detection method	14	14_visual_object_objects_category	Topic11-Visual Processing Mechanism and Modeling	['visual', 'object', 'objects', 'category', 'scene', 'image', 'images', 'vision', 'similarity', 'categorization', 'representations', 'shape', 'categories', 'stimuli', 'scenes', 'neural', 'cnns', 'recognition', 'memory', 'networks']	['A failure to learn object shape geometry: Implications for convolutional neural networks as plausible models of biological vision. Here we examine the plausibility of deep convolutional neural networks (CNNs) as a theoretical framework for understanding biological vision in the context of image classification. Recent work on object recognition in human vision has shown that both global, and loc…	visual - object - objects - category - scene - image - images - vision - similarity - categorization - representations - shape - categories - stimuli - scenes - neural - cnns - recognition - memory - networks	0.277937	FALSE	Article	Edge detection; Convolutional neural network; ResNet; Edge refinement	2019	14	COGNITIVE SYSTEMS RESEARCH
Comparative Efficacy and Safety of Antipsychotic Drugs for Tic Disorders: A Systematic Review and Bayesian Network Meta-Analysis	1	1_depression_treatment_health_covid	Topic2-AI Assisted Depression Treatment	['depression', 'treatment', 'health', 'covid', 'anxiety', 'covid 19', '19', 'pandemic', 'mental', 'depressive', 'antidepressant', 'symptoms', 'predictors', 'machine learning', 'mental health', 'clinical', 'machine', 'psychiatric', 'patients', 'prediction']	['Mental health after the COVID-19 pandemic among Finnish youth: a repeated, cross-sectional, population-based study. Background High levels of mental health problems among young people were reported during the COVID-19 pandemic, but studies of the post-pandemic period are scarce. We assessed mental health problems among Finnish youth before, during, and after the COVID-19 pandemic using nationwi…	depression - treatment - health - covid - anxiety - covid 19 - 19 - pandemic - mental - depressive - antidepressant - symptoms - predictors - machine learning - mental health - clinical - machine - psychiatric - patients - prediction	0.117674	FALSE	Review	tic disorder; antipsychotic drug; systematic review; network meta-analysis	2019	17	PHARMACOPSYCHIATRY
Description of the neural network based on AB/DL pictures. Possible implications for forensic sexology	10	10_mental health_health_mental_ai	Topic13-Digital Mental Health Services	['mental health', 'health', 'mental', 'ai', 'ethical', 'care', 'artificial intelligence', 'intelligence', 'psychotherapy', 'technologies', 'artificial', 'health care', 'technology', 'digital', 'healthcare', 'mental health care', 'interventions', 'chatbot', 'intervention', 'psychiatry']	["Using Psychological Artificial Intelligence (Tess) to Relieve Symptoms of Depression and Anxiety: Randomized Controlled Trial. Background: Students in need of mental health care face many barriers including cost, location, availability, and stigma. Studies show that computer-assisted therapy and 1 conversational chatbot delivering cognitive behavioral therapy (CBT) offer a less-intensive and mo…	mental health - health - mental - ai - ethical - care - artificial intelligence - intelligence - psychotherapy - technologies - artificial - health care - technology - digital - healthcare - mental health care - interventions - chatbot - intervention - psychiatry	0.485884	FALSE	Review	machine learning; artificial intelligence; psychotherapy; hardware; Artificial neural networks; ?artificial intel	2022	2	POSTEPY PSYCHIATRII I NEUROLOGII
A psychophysical and computational analysis of the spatio-temporal mechanisms underlying the flash-lag effect	14	14_visual_object_objects_category	Topic11-Visual Processing Mechanism and Modeling	['visual', 'object', 'objects', 'category', 'scene', 'image', 'images', 'vision', 'similarity', 'categorization', 'representations', 'shape', 'categories', 'stimuli', 'scenes', 'neural', 'cnns', 'recognition', 'memory', 'networks']	['A failure to learn object shape geometry: Implications for convolutional neural networks as plausible models of biological vision. Here we examine the plausibility of deep convolutional neural networks (CNNs) as a theoretical framework for understanding biological vision in the context of image classification. Recent work on object recognition in human vision has shown that both global, and loc…	visual - object - objects - category - scene - image - images - vision - similarity - categorization - representations - shape - categories - stimuli - scenes - neural - cnns - recognition - memory - networks	0.212656	FALSE	Article		2008	5	PERCEPTION
Intensity and Learning Outcomes in the Treatment of Children With Autism Spectrum Disorder	7	7_asd_autism_autism spectrum_autism spectrum disorder	Topic12-Autism Detection	['asd', 'autism', 'autism spectrum', 'autism spectrum disorder', 'spectrum disorder', 'spectrum', 'children', 'autistic', 'spectrum disorder asd', 'disorder asd', 'children asd', 'disorder', 'td', 'children autism', 'individuals asd', 'neurodevelopmental', 'social', 'typically developing', 'children autism spectrum', 'toddlers']	['Aberrant Functional Connectivity of Neural Circuits Associated with Social and Sensorimotor Deficits in Young Children with Autism Spectrum Disorder. Autism spectrum disorder (ASD) is a neurodevelopmental disorder characterized by atypical functional integration of brain regions. The vast majority of neuroimaging studies of ASD have focused on older children, adolescents, and adults with the di…	asd - autism - autism spectrum - autism spectrum disorder - spectrum disorder - spectrum - children - autistic - spectrum disorder asd - disorder asd - children asd - disorder - td - children autism - individuals asd - neurodevelopmental - social - typically developing - children autism spectrum - toddlers	1	FALSE	Article	autism spectrum disorder; treatment intensity; applied behavior analysis; treatment outcomes	2017	63	BEHAVIOR MODIFICATION
An effective daily box office prediction model based on deep neural networks	3	3_personality_media_sentiment_social	Topic3-ML-based Personality Assessment	['personality', 'media', 'sentiment', 'social', 'social media', 'text', 'language', 'twitter', 'big', 'online', 'users', 'sentiment analysis', 'traits', 'natural language', 'news', 'content', 'public', 'analysis', 'data', 'psychological']	["Exploring a Language-Based Interest Assessment: Predicting Vocational Interests on Social Media Using Natural Language Processing. For more than a century, self-report inventories have been the traditional method for assessing vocational interests. Little research has examined the use of machine learning techniques, such as natural language processing (NLP), in interest assessment. This paper e…	personality - media - sentiment - social - social media - text - language - twitter - big - online - users - sentiment analysis - traits - natural language - news - content - public - analysis - data - psychological	0.0573519	FALSE	Article	LSTM; Movie box office; Prediction; Time series; Deep neural network	2018	22	COGNITIVE SYSTEMS RESEARCH
Hearing temperatures: employing machine learning for elucidating the cross-modal perception of thermal properties through audition	14	14_visual_object_objects_category	Topic11-Visual Processing Mechanism and Modeling	['visual', 'object', 'objects', 'category', 'scene', 'image', 'images', 'vision', 'similarity', 'categorization', 'representations', 'shape', 'categories', 'stimuli', 'scenes', 'neural', 'cnns', 'recognition', 'memory', 'networks']	['A failure to learn object shape geometry: Implications for convolutional neural networks as plausible models of biological vision. Here we examine the plausibility of deep convolutional neural networks (CNNs) as a theoretical framework for understanding biological vision in the context of image classification. Recent work on object recognition in human vision has shown that both global, and loc…	visual - object - objects - category - scene - image - images - vision - similarity - categorization - representations - shape - categories - stimuli - scenes - neural - cnns - recognition - memory - networks	0.0771941	FALSE	Article	cross-modal correspondences; multisensory integration; sensory; thermal perception; multimodal	2024	0	FRONTIERS IN PSYCHOLOGY
Predicate learning in neural systems: using oscillations to discover latent structure	0	0_language_cognitive_word_computational	Topic1-Human Cognitive Science	['language', 'cognitive', 'word', 'computational', 'neural', 'human', 'representations', 'models', 'cognition', 'knowledge', 'model', 'semantic', 'artificial', 'learning', 'words', 'information', 'cognitive science', 'reasoning', 'representation', 'intelligence']	['Artificial intelligence, human cognition, and conscious supremacy. The computational significance of consciousness is an important and potentially more tractable research theme than the hard problem of consciousness, as one could look at the correlation of consciousness and computational capacities through, e.g., algorithmic or complexity analyses. In the literature, consciousness is defined as…	language - cognitive - word - computational - neural - human - representations - models - cognition - knowledge - model - semantic - artificial - learning - words - information - cognitive science - reasoning - representation - intelligence	0.364916	FALSE	Review		2019	23	CURRENT OPINION IN BEHAVIORAL SCIENCES
Interhemispheric effects of simulated lesions in a neural model of single-word reading	8	8_ad_dementia_mci_alzheimer	Topic10-Alzheimer Detection	['ad', 'dementia', 'mci', 'alzheimer', 'disease', 'alzheimer disease', 'age', 'cognitive impairment', 'brain age', 'brain', 'cognitive', 'impairment', 'aging', 'mild', 'mild cognitive', 'mild cognitive impairment', 'mri', 'aphasia', 'lesion', 'speech']	["Plasma d-glutamate levels for detecting mild cognitive impairment and Alzheimer's disease: Machine learning approaches. Background: d-glutamate, which is involved in N-methyl-d-aspartate receptor modulation, may be associated with cognitive ageing. Aims: This study aimed to use peripheral plasma d-glutamate levels to differentiate patients with mild cognitive impairment (MCI) and Alzheimer's di…	ad - dementia - mci - alzheimer - disease - alzheimer disease - age - cognitive impairment - brain age - brain - cognitive - impairment - aging - mild - mild cognitive - mild cognitive impairment - mri - aphasia - lesion - speech	0.102637	FALSE	Article	artificial neural networks; computer model; hemispheric interactions; corpus callosum; lateralization; cortical lesions	2000	19	BRAIN AND LANGUAGE
A primer on encoding models in sensory neuroscience	0	0_language_cognitive_word_computational	Topic1-Human Cognitive Science	['language', 'cognitive', 'word', 'computational', 'neural', 'human', 'representations', 'models', 'cognition', 'knowledge', 'model', 'semantic', 'artificial', 'learning', 'words', 'information', 'cognitive science', 'reasoning', 'representation', 'intelligence']	['Artificial intelligence, human cognition, and conscious supremacy. The computational significance of consciousness is an important and potentially more tractable research theme than the hard problem of consciousness, as one could look at the correlation of consciousness and computational capacities through, e.g., algorithmic or complexity analyses. In the literature, consciousness is defined as…	language - cognitive - word - computational - neural - human - representations - models - cognition - knowledge - model - semantic - artificial - learning - words - information - cognitive science - reasoning - representation - intelligence	0.359751	FALSE	Article	Population receptive field; Encoding; Decoding; Sensory neuroscience	2017	33	JOURNAL OF MATHEMATICAL PSYCHOLOGY
Exploring artificial intelligence approach to art therapy assessment: A case study on the classification and the estimation of psychological state based on a drawing	22	22_creativity_creative_art_aesthetic	Topic26-AI in Creativity Research	['creativity', 'creative', 'art', 'aesthetic', 'artworks', 'ai', 'human', 'human creativity', 'artwork', 'divergent', 'artistic', 'image', 'originality', 'thinking', 'semantic distance', 'painting', 'artists', 'paintings', 'creative process', 'literary']	["Art therapy to control nail biting using a cognitive behavioral approach through new innovative game and animation. BackgroundNail biting is categorized as a habitual behavior, commonly observed in children and occasionally in adults. This disorder occurs unconsciously, with individuals often unaware of their behavior. Since there are physical and psychological complications and quality of life…	creativity - creative - art - aesthetic - artworks - ai - human - human creativity - artwork - divergent - artistic - image - originality - thinking - semantic distance - painting - artists - paintings - creative process - literary	1	FALSE	Article	Artificial intelligence approach; Deep convolutional neural networks; Art therapy assessment; Stepwise and logistiq regressions; Classification and estimation of psychological states	2024	0	NEW IDEAS IN PSYCHOLOGY
Development and validation of a meta-learner for combining statistical and machine learning prediction models in individuals with depression	1	1_depression_treatment_health_covid	Topic2-AI Assisted Depression Treatment	['depression', 'treatment', 'health', 'covid', 'anxiety', 'covid 19', '19', 'pandemic', 'mental', 'depressive', 'antidepressant', 'symptoms', 'predictors', 'machine learning', 'mental health', 'clinical', 'machine', 'psychiatric', 'patients', 'prediction']	['Mental health after the COVID-19 pandemic among Finnish youth: a repeated, cross-sectional, population-based study. Background High levels of mental health problems among young people were reported during the COVID-19 pandemic, but studies of the post-pandemic period are scarce. We assessed mental health problems among Finnish youth before, during, and after the COVID-19 pandemic using nationwi…	depression - treatment - health - covid - anxiety - covid 19 - 19 - pandemic - mental - depressive - antidepressant - symptoms - predictors - machine learning - mental health - clinical - machine - psychiatric - patients - prediction	1	FALSE	Article	Depression; PHQ-9; Dropout; Machine learning; Statistical model	2022	8	BMC PSYCHIATRY
Using Machine Learning to Create an Adaptable, Scalable, and Interpretable Behavioral Model	0	0_language_cognitive_word_computational	Topic1-Human Cognitive Science	['language', 'cognitive', 'word', 'computational', 'neural', 'human', 'representations', 'models', 'cognition', 'knowledge', 'model', 'semantic', 'artificial', 'learning', 'words', 'information', 'cognitive science', 'reasoning', 'representation', 'intelligence']	['Artificial intelligence, human cognition, and conscious supremacy. The computational significance of consciousness is an important and potentially more tractable research theme than the hard problem of consciousness, as one could look at the correlation of consciousness and computational capacities through, e.g., algorithmic or complexity analyses. In the literature, consciousness is defined as…	language - cognitive - word - computational - neural - human - representations - models - cognition - knowledge - model - semantic - artificial - learning - words - information - cognitive science - reasoning - representation - intelligence	0.149547	FALSE	Article	behavioral economics; human decision making; interpretability; cognitive models	2024	1	DECISION-WASHINGTON
CNN-based search model fails to account for human attention guidance by simple visual features	14	14_visual_object_objects_category	Topic11-Visual Processing Mechanism and Modeling	['visual', 'object', 'objects', 'category', 'scene', 'image', 'images', 'vision', 'similarity', 'categorization', 'representations', 'shape', 'categories', 'stimuli', 'scenes', 'neural', 'cnns', 'recognition', 'memory', 'networks']	['A failure to learn object shape geometry: Implications for convolutional neural networks as plausible models of biological vision. Here we examine the plausibility of deep convolutional neural networks (CNNs) as a theoretical framework for understanding biological vision in the context of image classification. Recent work on object recognition in human vision has shown that both global, and loc…	visual - object - objects - category - scene - image - images - vision - similarity - categorization - representations - shape - categories - stimuli - scenes - neural - cnns - recognition - memory - networks	1	FALSE	Article	Models of attention; Neural network modeling; Visual search - Simple visual features; Feature conjunctions	2024	1	ATTENTION PERCEPTION & PSYCHOPHYSICS
Connectionist semantic systematicity	0	0_language_cognitive_word_computational	Topic1-Human Cognitive Science	['language', 'cognitive', 'word', 'computational', 'neural', 'human', 'representations', 'models', 'cognition', 'knowledge', 'model', 'semantic', 'artificial', 'learning', 'words', 'information', 'cognitive science', 'reasoning', 'representation', 'intelligence']	['Artificial intelligence, human cognition, and conscious supremacy. The computational significance of consciousness is an important and potentially more tractable research theme than the hard problem of consciousness, as one could look at the correlation of consciousness and computational capacities through, e.g., algorithmic or complexity analyses. In the literature, consciousness is defined as…	language - cognitive - word - computational - neural - human - representations - models - cognition - knowledge - model - semantic - artificial - learning - words - information - cognitive science - reasoning - representation - intelligence	0.283909	FALSE	Article	Systematicity; Connectionism; Sentence comprehension; Semantics; Analogical representation	2009	30	COGNITION
Silent talker: A new computer-based system for the analysis of facial cues to deception	-1	-1_ocd_gut_gambling_delirium	NOISE	['ocd', 'gut', 'gambling', 'delirium', 'microbiota', 'obsessive', 'obsessive compulsive', 'compulsive', 'gut microbiota', 'patients', 'obsessive compulsive disorder', 'compulsive disorder', 'microbiome', 'igd', 'speech', 'violent', 'risk', 'machine learning', 'machine', 'using']	['Data-driven identification of subtypes of executive function across typical development, attention deficit hyperactivity disorder, and autism spectrum disorders. Background Impairment of executive function (EF), the goal-directed regulation of thoughts, actions, and emotions, drives negative outcomes and is common across neurodevelopmental disorders including attention deficit hyperactivity dis…	ocd - gut - gambling - delirium - microbiota - obsessive - obsessive compulsive - compulsive - gut microbiota - patients - obsessive compulsive disorder - compulsive disorder - microbiome - igd - speech - violent - risk - machine learning - machine - using	0.529724	FALSE	Article		2006	30	APPLIED COGNITIVE PSYCHOLOGY
Visual Choice Behavior by Bumblebees (Bombus impatiens) Confirms Unsupervised Neural Network's Predictions	14	14_visual_object_objects_category	Topic11-Visual Processing Mechanism and Modeling	['visual', 'object', 'objects', 'category', 'scene', 'image', 'images', 'vision', 'similarity', 'categorization', 'representations', 'shape', 'categories', 'stimuli', 'scenes', 'neural', 'cnns', 'recognition', 'memory', 'networks']	['A failure to learn object shape geometry: Implications for convolutional neural networks as plausible models of biological vision. Here we examine the plausibility of deep convolutional neural networks (CNNs) as a theoretical framework for understanding biological vision in the context of image classification. Recent work on object recognition in human vision has shown that both global, and loc…	visual - object - objects - category - scene - image - images - vision - similarity - categorization - representations - shape - categories - stimuli - scenes - neural - cnns - recognition - memory - networks	0.118039	FALSE	Article	bumblebees; symmetry; visual preferences; neural networks; unlearned behavior	2015	1	JOURNAL OF COMPARATIVE PSYCHOLOGY
A hybrid learning framework for fine-grained interpretation of brain spatiotemporal patterns during naturalistic functional magnetic resonance imaging	14	14_visual_object_objects_category	Topic11-Visual Processing Mechanism and Modeling	['visual', 'object', 'objects', 'category', 'scene', 'image', 'images', 'vision', 'similarity', 'categorization', 'representations', 'shape', 'categories', 'stimuli', 'scenes', 'neural', 'cnns', 'recognition', 'memory', 'networks']	['A failure to learn object shape geometry: Implications for convolutional neural networks as plausible models of biological vision. Here we examine the plausibility of deep convolutional neural networks (CNNs) as a theoretical framework for understanding biological vision in the context of image classification. Recent work on object recognition in human vision has shown that both global, and loc…	visual - object - objects - category - scene - image - images - vision - similarity - categorization - representations - shape - categories - stimuli - scenes - neural - cnns - recognition - memory - networks	0.0635148	FALSE	Article	naturalistic stimuli; spatiotemporal; fMRI; convolutional neural network; Predictive Model	2022	0	FRONTIERS IN HUMAN NEUROSCIENCE
Associations between Socioeconomic Status, Cognition, and Brain Structure: Evaluating Potential Causal Pathways Through Mechanistic Models of Development	26	26_adhd_hyperactivity_hyperactivity disorder_deficit hyperactivity disorder	Topic27-ADHD Detection	['adhd', 'hyperactivity', 'hyperactivity disorder', 'deficit hyperactivity disorder', 'deficit hyperactivity', 'attention deficit', 'attention deficit hyperactivity', 'deficit', 'disorder adhd', 'hyperactivity disorder adhd', 'attention', 'children', 'children adhd', 'adult adhd', 'adhd symptoms', 'disorder', 'adult', 'adhd diagnosis', 'symptoms', 'diagnosis']	['Application and Expansion of an Algorithm Predicting Attention-Deficit/Hyperactivity Disorder and Impairment in a Predominantly White Sample. Current assessment protocols for attention-deficit/hyperactivity disorder (ADHD) focus heavily on a set of highly overlapping symptoms, with well-validated factors like cognitive disengagement syndrome (CDS), executive function (EF), age, sex, and race an…	adhd - hyperactivity - hyperactivity disorder - deficit hyperactivity disorder - deficit hyperactivity - attention deficit - attention deficit hyperactivity - deficit - disorder adhd - hyperactivity disorder adhd - attention - children - children adhd - adult adhd - adhd symptoms - disorder - adult - adhd diagnosis - symptoms - diagnosis	0.0803245	FALSE	Article	Cognitive development; Socioeconomic status; Brain development; Structural MRI; Intelligence; Heritability; Artificial neural networks; Intervention; Cortical surface area; Cortical thickness	2023	13	COGNITIVE SCIENCE
Adaptive magnification network for precise tumor analysis in histopathological images	8	8_ad_dementia_mci_alzheimer	Topic10-Alzheimer Detection	['ad', 'dementia', 'mci', 'alzheimer', 'disease', 'alzheimer disease', 'age', 'cognitive impairment', 'brain age', 'brain', 'cognitive', 'impairment', 'aging', 'mild', 'mild cognitive', 'mild cognitive impairment', 'mri', 'aphasia', 'lesion', 'speech']	["Plasma d-glutamate levels for detecting mild cognitive impairment and Alzheimer's disease: Machine learning approaches. Background: d-glutamate, which is involved in N-methyl-d-aspartate receptor modulation, may be associated with cognitive ageing. Aims: This study aimed to use peripheral plasma d-glutamate levels to differentiate patients with mild cognitive impairment (MCI) and Alzheimer's di…	ad - dementia - mci - alzheimer - disease - alzheimer disease - age - cognitive impairment - brain age - brain - cognitive - impairment - aging - mild - mild cognitive - mild cognitive impairment - mri - aphasia - lesion - speech	0.13349	FALSE	Article	Breast cancer histopathology; Magnification invariance; Stain normalization; Multi-level features; Cancer diagnostics; Histopathological images	2024	1	COMPUTERS IN HUMAN BEHAVIOR
Optimizing Imputation for Educational Data: Exploring Training Partition and Missing Data Ratios	18	18_item_simulation_missing_dif	Topic16-ML in Psychometrics	['item', 'simulation', 'missing', 'dif', 'data', 'imputation', 'methods', 'method', 'missing data', 'variables', 'mathematics', 'reading', 'pisa', 'bayesian', 'machine learning', 'modeling', 'items', 'model', 'approach', 'estimation']	['One Model to Rule Them All? Using Machine Learning Algorithms to Determine the Number of Factors in Exploratory Factor Analysis. Determining the number of factors is one of the most crucial decisions a researcher has to face when conducting an exploratory factor analysis. As no common factor retention criterion can be seen as generally superior, a new approach is proposed-combining extensive da…	item - simulation - missing - dif - data - imputation - methods - method - missing data - variables - mathematics - reading - pisa - bayesian - machine learning - modeling - items - model - approach - estimation	1	FALSE	Article; Early Access	Imputation; neural networks; propensity score analysis; random forest	2023	1	JOURNAL OF EXPERIMENTAL EDUCATION
ARTIFICIAL INTELLIGENCE IN MEDICAL DEVICES: PAST, PRESENT AND FUTURE	10	10_mental health_health_mental_ai	Topic13-Digital Mental Health Services	['mental health', 'health', 'mental', 'ai', 'ethical', 'care', 'artificial intelligence', 'intelligence', 'psychotherapy', 'technologies', 'artificial', 'health care', 'technology', 'digital', 'healthcare', 'mental health care', 'interventions', 'chatbot', 'intervention', 'psychiatry']	["Using Psychological Artificial Intelligence (Tess) to Relieve Symptoms of Depression and Anxiety: Randomized Controlled Trial. Background: Students in need of mental health care face many barriers including cost, location, availability, and stigma. Studies show that computer-assisted therapy and 1 conversational chatbot delivering cognitive behavioral therapy (CBT) offer a less-intensive and mo…	mental health - health - mental - ai - ethical - care - artificial intelligence - intelligence - psychotherapy - technologies - artificial - health care - technology - digital - healthcare - mental health care - interventions - chatbot - intervention - psychiatry	1	FALSE	Review	Artificial intelligence; Machine learning; Neural network; Medical devices; prediction; diagnosis	2021	54	PSYCHIATRIA DANUBINA
A neural network model for combining clinical predictors of antidepressant response in mood disorders	1	1_depression_treatment_health_covid	Topic2-AI Assisted Depression Treatment	['depression', 'treatment', 'health', 'covid', 'anxiety', 'covid 19', '19', 'pandemic', 'mental', 'depressive', 'antidepressant', 'symptoms', 'predictors', 'machine learning', 'mental health', 'clinical', 'machine', 'psychiatric', 'patients', 'prediction']	['Mental health after the COVID-19 pandemic among Finnish youth: a repeated, cross-sectional, population-based study. Background High levels of mental health problems among young people were reported during the COVID-19 pandemic, but studies of the post-pandemic period are scarce. We assessed mental health problems among Finnish youth before, during, and after the COVID-19 pandemic using nationwi…	depression - treatment - health - covid - anxiety - covid 19 - 19 - pandemic - mental - depressive - antidepressant - symptoms - predictors - machine learning - mental health - clinical - machine - psychiatric - patients - prediction	1	FALSE	Article	bipolar disorder; major depressive disorder; neural network; outcome predictors	2007	20	JOURNAL OF AFFECTIVE DISORDERS
Weaker number sense accounts for impaired numerosity perception in dyscalculia: Behavioral and computational evidence	0	0_language_cognitive_word_computational	Topic1-Human Cognitive Science	['language', 'cognitive', 'word', 'computational', 'neural', 'human', 'representations', 'models', 'cognition', 'knowledge', 'model', 'semantic', 'artificial', 'learning', 'words', 'information', 'cognitive science', 'reasoning', 'representation', 'intelligence']	['Artificial intelligence, human cognition, and conscious supremacy. The computational significance of consciousness is an important and potentially more tractable research theme than the hard problem of consciousness, as one could look at the correlation of consciousness and computational capacities through, e.g., algorithmic or complexity analyses. In the literature, consciousness is defined as…	language - cognitive - word - computational - neural - human - representations - models - cognition - knowledge - model - semantic - artificial - learning - words - information - cognitive science - reasoning - representation - intelligence	0.0975778	FALSE	Article	approximate number system; continuous visual magnitudes; deep neural networks; developmental dyscalculia; numerical cognition	2024	2	DEVELOPMENTAL SCIENCE
Representing Context and Priority in Working Memory	0	0_language_cognitive_word_computational	Topic1-Human Cognitive Science	['language', 'cognitive', 'word', 'computational', 'neural', 'human', 'representations', 'models', 'cognition', 'knowledge', 'model', 'semantic', 'artificial', 'learning', 'words', 'information', 'cognitive science', 'reasoning', 'representation', 'intelligence']	['Artificial intelligence, human cognition, and conscious supremacy. The computational significance of consciousness is an important and potentially more tractable research theme than the hard problem of consciousness, as one could look at the correlation of consciousness and computational capacities through, e.g., algorithmic or complexity analyses. In the literature, consciousness is defined as…	language - cognitive - word - computational - neural - human - representations - models - cognition - knowledge - model - semantic - artificial - learning - words - information - cognitive science - reasoning - representation - intelligence	0.149502	FALSE	Article		2024	2	JOURNAL OF COGNITIVE NEUROSCIENCE
Predicting Identity-Preserving Object Transformations in Human Posterior Parietal Cortex and Convolutional Neural Networks	14	14_visual_object_objects_category	Topic11-Visual Processing Mechanism and Modeling	['visual', 'object', 'objects', 'category', 'scene', 'image', 'images', 'vision', 'similarity', 'categorization', 'representations', 'shape', 'categories', 'stimuli', 'scenes', 'neural', 'cnns', 'recognition', 'memory', 'networks']	['A failure to learn object shape geometry: Implications for convolutional neural networks as plausible models of biological vision. Here we examine the plausibility of deep convolutional neural networks (CNNs) as a theoretical framework for understanding biological vision in the context of image classification. Recent work on object recognition in human vision has shown that both global, and loc…	visual - object - objects - category - scene - image - images - vision - similarity - categorization - representations - shape - categories - stimuli - scenes - neural - cnns - recognition - memory - networks	1	FALSE	Article		2022	3	JOURNAL OF COGNITIVE NEUROSCIENCE
Environmental Correlates of Active Travel Behavior of Children	-1	-1_ocd_gut_gambling_delirium	NOISE	['ocd', 'gut', 'gambling', 'delirium', 'microbiota', 'obsessive', 'obsessive compulsive', 'compulsive', 'gut microbiota', 'patients', 'obsessive compulsive disorder', 'compulsive disorder', 'microbiome', 'igd', 'speech', 'violent', 'risk', 'machine learning', 'machine', 'using']	['Data-driven identification of subtypes of executive function across typical development, attention deficit hyperactivity disorder, and autism spectrum disorders. Background Impairment of executive function (EF), the goal-directed regulation of thoughts, actions, and emotions, drives negative outcomes and is common across neurodevelopmental disorders including attention deficit hyperactivity dis…	ocd - gut - gambling - delirium - microbiota - obsessive - obsessive compulsive - compulsive - gut microbiota - patients - obsessive compulsive disorder - compulsive disorder - microbiome - igd - speech - violent - risk - machine learning - machine - using	0.829373	FALSE	Article	Bayesian belief network; bicycling; physical environment; walking; children; social environment	2014	36	ENVIRONMENT AND BEHAVIOR
The spatiotemporal neural dynamics of object location representations in the human brain	14	14_visual_object_objects_category	Topic11-Visual Processing Mechanism and Modeling	['visual', 'object', 'objects', 'category', 'scene', 'image', 'images', 'vision', 'similarity', 'categorization', 'representations', 'shape', 'categories', 'stimuli', 'scenes', 'neural', 'cnns', 'recognition', 'memory', 'networks']	['A failure to learn object shape geometry: Implications for convolutional neural networks as plausible models of biological vision. Here we examine the plausibility of deep convolutional neural networks (CNNs) as a theoretical framework for understanding biological vision in the context of image classification. Recent work on object recognition in human vision has shown that both global, and loc…	visual - object - objects - category - scene - image - images - vision - similarity - categorization - representations - shape - categories - stimuli - scenes - neural - cnns - recognition - memory - networks	1	FALSE	Article		2022	22	NATURE HUMAN BEHAVIOUR
Comparing cognition across major transitions using the hierarchy of formal automata	0	0_language_cognitive_word_computational	Topic1-Human Cognitive Science	['language', 'cognitive', 'word', 'computational', 'neural', 'human', 'representations', 'models', 'cognition', 'knowledge', 'model', 'semantic', 'artificial', 'learning', 'words', 'information', 'cognitive science', 'reasoning', 'representation', 'intelligence']	['Artificial intelligence, human cognition, and conscious supremacy. The computational significance of consciousness is an important and potentially more tractable research theme than the hard problem of consciousness, as one could look at the correlation of consciousness and computational capacities through, e.g., algorithmic or complexity analyses. In the literature, consciousness is defined as…	language - cognitive - word - computational - neural - human - representations - models - cognition - knowledge - model - semantic - artificial - learning - words - information - cognitive science - reasoning - representation - intelligence	0.631776	FALSE	Article	evolution of cognition; formal automata; formal grammars; insect cognition; major transitions	2024	0	WILEY INTERDISCIPLINARY REVIEWS-COGNITIVE SCIENCE
Cardiac autonomic responses in relation to cognitive workload during simulated military flight	24	24_driving_workload_driver_drivers	Topic25-Mental Workload Evaluation	['driving', 'workload', 'driver', 'drivers', 'mental workload', 'traffic', 'road', 'vehicle', 'distraction', 'cognitive load', 'load', 'pedestrian', 'safety', 'task', 'cognitive workload', 'fatigue', 'physiological', 'simulator', 'drowsiness', 'eye']	["Driver's mental workload classification using physiological, traffic flow and environmental factors. During the dynamic driving process, classification of mental workload for drivers is a complex task due to multiple factors, including human, vehicle, road, and the environment. Many current studies focus on the impacts of a single factor, such as physiological signal, lane changing, and so on, …	driving - workload - driver - drivers - mental workload - traffic - road - vehicle - distraction - cognitive load - load - pedestrian - safety - task - cognitive workload - fatigue - physiological - simulator - drowsiness - eye	1	FALSE	Article	Flight simulator; Heart rate variability; Mental workload	2024	1	APPLIED ERGONOMICS
Letter perception emerges from unsupervised deep learning and recycling of natural image features	14	14_visual_object_objects_category	Topic11-Visual Processing Mechanism and Modeling	['visual', 'object', 'objects', 'category', 'scene', 'image', 'images', 'vision', 'similarity', 'categorization', 'representations', 'shape', 'categories', 'stimuli', 'scenes', 'neural', 'cnns', 'recognition', 'memory', 'networks']	['A failure to learn object shape geometry: Implications for convolutional neural networks as plausible models of biological vision. Here we examine the plausibility of deep convolutional neural networks (CNNs) as a theoretical framework for understanding biological vision in the context of image classification. Recent work on object recognition in human vision has shown that both global, and loc…	visual - object - objects - category - scene - image - images - vision - similarity - categorization - representations - shape - categories - stimuli - scenes - neural - cnns - recognition - memory - networks	0.208942	FALSE	Article		2017	33	NATURE HUMAN BEHAVIOUR
Are we tweeting our real selves? personality prediction of Indian Twitter users using deep learning ensemble model	3	3_personality_media_sentiment_social	Topic3-ML-based Personality Assessment	['personality', 'media', 'sentiment', 'social', 'social media', 'text', 'language', 'twitter', 'big', 'online', 'users', 'sentiment analysis', 'traits', 'natural language', 'news', 'content', 'public', 'analysis', 'data', 'psychological']	["Exploring a Language-Based Interest Assessment: Predicting Vocational Interests on Social Media Using Natural Language Processing. For more than a century, self-report inventories have been the traditional method for assessing vocational interests. Little research has examined the use of machine learning techniques, such as natural language processing (NLP), in interest assessment. This paper e…	personality - media - sentiment - social - social media - text - language - twitter - big - online - users - sentiment analysis - traits - natural language - news - content - public - analysis - data - psychological	1	FALSE	Article	Social networking sites; Twitter; Deep learning; BiLSTM; Personality	2022	5	COMPUTERS IN HUMAN BEHAVIOR
A tutorial on kernel methods for categorization	14	14_visual_object_objects_category	Topic11-Visual Processing Mechanism and Modeling	['visual', 'object', 'objects', 'category', 'scene', 'image', 'images', 'vision', 'similarity', 'categorization', 'representations', 'shape', 'categories', 'stimuli', 'scenes', 'neural', 'cnns', 'recognition', 'memory', 'networks']	['A failure to learn object shape geometry: Implications for convolutional neural networks as plausible models of biological vision. Here we examine the plausibility of deep convolutional neural networks (CNNs) as a theoretical framework for understanding biological vision in the context of image classification. Recent work on object recognition in human vision has shown that both global, and loc…	visual - object - objects - category - scene - image - images - vision - similarity - categorization - representations - shape - categories - stimuli - scenes - neural - cnns - recognition - memory - networks	0.282899	FALSE	Review	kernel; similarity; machine learning; generalization; categorization	2007	59	JOURNAL OF MATHEMATICAL PSYCHOLOGY
Predicting Antecedents of Employee Smart Work Adoption Using SEM-Multilayer Perceptron Approach	16	16_employees_job_employee_ai	Topic18-AI in Organizational Management	['employees', 'job', 'employee', 'ai', 'organizational', 'management', 'organizations', 'hrm', 'leadership', 'career', 'work', 'workplace', 'human resource', 'artificial intelligence', 'intelligence', 'hr', 'artificial', 'technology', 'innovation', 'coaching']	["Job attitudes and career behaviors relating to employees' perceived incorporation of artificial intelligence in the workplace: a career self-management perspective. Purpose Artificial intelligence (AI) continues to be deployed in workplaces. While there are many positive outcomes of AI integration, understanding the extent of its consequences on employees is limited. Hence, this study examines …	employees - job - employee - ai - organizational - management - organizations - hrm - leadership - career - work - workplace - human resource - artificial intelligence - intelligence - hr - artificial - technology - innovation - coaching	0.11517	FALSE	Article		2023	1	HUMAN BEHAVIOR AND EMERGING TECHNOLOGIES
Autoshaped impulsivity: Some explorations with a neural network model	0	0_language_cognitive_word_computational	Topic1-Human Cognitive Science	['language', 'cognitive', 'word', 'computational', 'neural', 'human', 'representations', 'models', 'cognition', 'knowledge', 'model', 'semantic', 'artificial', 'learning', 'words', 'information', 'cognitive science', 'reasoning', 'representation', 'intelligence']	['Artificial intelligence, human cognition, and conscious supremacy. The computational significance of consciousness is an important and potentially more tractable research theme than the hard problem of consciousness, as one could look at the correlation of consciousness and computational capacities through, e.g., algorithmic or complexity analyses. In the literature, consciousness is defined as…	language - cognitive - word - computational - neural - human - representations - models - cognition - knowledge - model - semantic - artificial - learning - words - information - cognitive science - reasoning - representation - intelligence	0.0841783	FALSE	Article	Artificial neural networks; Impulsivity; Pavlovian contingencies; Temporal discounting; Computational learning models; Autoshaped	2024	0	BEHAVIOURAL PROCESSES
Building an Open Source Classifier for the Neonatal EEG Background: A Systematic Feature-Based Approach From Expert Scoring to Clinical Visualization	7	7_asd_autism_autism spectrum_autism spectrum disorder	Topic12-Autism Detection	['asd', 'autism', 'autism spectrum', 'autism spectrum disorder', 'spectrum disorder', 'spectrum', 'children', 'autistic', 'spectrum disorder asd', 'disorder asd', 'children asd', 'disorder', 'td', 'children autism', 'individuals asd', 'neurodevelopmental', 'social', 'typically developing', 'children autism spectrum', 'toddlers']	['Aberrant Functional Connectivity of Neural Circuits Associated with Social and Sensorimotor Deficits in Young Children with Autism Spectrum Disorder. Autism spectrum disorder (ASD) is a neurodevelopmental disorder characterized by atypical functional integration of brain regions. The vast majority of neuroimaging studies of ASD have focused on older children, adolescents, and adults with the di…	asd - autism - autism spectrum - autism spectrum disorder - spectrum disorder - spectrum - children - autistic - spectrum disorder asd - disorder asd - children asd - disorder - td - children autism - individuals asd - neurodevelopmental - social - typically developing - children autism spectrum - toddlers	0.150764	FALSE	Article	neonatal EEG; EEG monitoring; neonatal intensive care unit; background classifier; support vector machine; artificial neural network; EEG trend	2021	20	FRONTIERS IN HUMAN NEUROSCIENCE
Webthetics: Quantifying webpage aesthetics with deep learning	22	22_creativity_creative_art_aesthetic	Topic26-AI in Creativity Research	['creativity', 'creative', 'art', 'aesthetic', 'artworks', 'ai', 'human', 'human creativity', 'artwork', 'divergent', 'artistic', 'image', 'originality', 'thinking', 'semantic distance', 'painting', 'artists', 'paintings', 'creative process', 'literary']	["Art therapy to control nail biting using a cognitive behavioral approach through new innovative game and animation. BackgroundNail biting is categorized as a habitual behavior, commonly observed in children and occasionally in adults. This disorder occurs unconsciously, with individuals often unaware of their behavior. Since there are physical and psychological complications and quality of life…	creativity - creative - art - aesthetic - artworks - ai - human - human creativity - artwork - divergent - artistic - image - originality - thinking - semantic distance - painting - artists - paintings - creative process - literary	0.332494	FALSE	Article	Webpage aesthetics; Deep learning; Web visual design; User experience	2019	51	INTERNATIONAL JOURNAL OF HUMAN-COMPUTER STUDIES
Hungary's Neglected Alcohol Problem: Alcohol Drinking in a Heavy Consumer Country	9	9_alcohol_substance_eating_use	Topic14-Substance Abuse Prediction	['alcohol', 'substance', 'eating', 'use', 'substance use', 'drinking', 'cannabis', 'alcohol use', 'use disorder', 'aud', 'binge', 'opioid', 'dependence', 'treatment', 'smoking', 'overdose', 'consumption', 'addiction', 'drug', 'binge eating']	['The prediction of resilience to alcohol consumption in youths: insular and subcallosal cingulate myeloarchitecture. Background The prediction of alcohol consumption in youths and particularly biomarkers of resilience, is critical for early intervention to reduce the risk of subsequent harmful alcohol use. Methods At baseline, the longitudinal relaxation rate (R1), indexing grey matter myelinati…	alcohol - substance - eating - use - substance use - drinking - cannabis - alcohol use - use disorder - aud - binge - opioid - dependence - treatment - smoking - overdose - consumption - addiction - drug - binge eating	1	FALSE	Article	alcohol consumption; alcohol consumption-related harms; socio-demographic factors; alcohol policy measures; time series analysis; Artificial Neural Network analysis	2014	6	SUBSTANCE USE & MISUSE
Analysis and simulation of creativity learning by means of artificial neural networks	22	22_creativity_creative_art_aesthetic	Topic26-AI in Creativity Research	['creativity', 'creative', 'art', 'aesthetic', 'artworks', 'ai', 'human', 'human creativity', 'artwork', 'divergent', 'artistic', 'image', 'originality', 'thinking', 'semantic distance', 'painting', 'artists', 'paintings', 'creative process', 'literary']	["Art therapy to control nail biting using a cognitive behavioral approach through new innovative game and animation. BackgroundNail biting is categorized as a habitual behavior, commonly observed in children and occasionally in adults. This disorder occurs unconsciously, with individuals often unaware of their behavior. Since there are physical and psychological complications and quality of life…	creativity - creative - art - aesthetic - artworks - ai - human - human creativity - artwork - divergent - artistic - image - originality - thinking - semantic distance - painting - artists - paintings - creative process - literary	1	FALSE	Article	Soft-modelling; Process orientation; Pattern recognition; Divergent thinking; Team sport	2009	33	HUMAN MOVEMENT SCIENCE
Alignment of color discrimination in humans and image segmentation networks	14	14_visual_object_objects_category	Topic11-Visual Processing Mechanism and Modeling	['visual', 'object', 'objects', 'category', 'scene', 'image', 'images', 'vision', 'similarity', 'categorization', 'representations', 'shape', 'categories', 'stimuli', 'scenes', 'neural', 'cnns', 'recognition', 'memory', 'networks']	['A failure to learn object shape geometry: Implications for convolutional neural networks as plausible models of biological vision. Here we examine the plausibility of deep convolutional neural networks (CNNs) as a theoretical framework for understanding biological vision in the context of image classification. Recent work on object recognition in human vision has shown that both global, and loc…	visual - object - objects - category - scene - image - images - vision - similarity - categorization - representations - shape - categories - stimuli - scenes - neural - cnns - recognition - memory - networks	1	FALSE	Article	vision models; color discrimination; image segmentation; artificial neural networks; U-Nets; image statistics; chromatic adaptation; Divisive Normalization	2024	0	FRONTIERS IN PSYCHOLOGY
The contribution of learner characteristics in the development of computer-based adaptive learning environments	2	2_students_teaching_education_teachers	Topic4-AI in Educational Psychology	['students', 'teaching', 'education', 'teachers', 'learning', 'educational', 'student', 'academic', 'ai', 'writing', 'college', 'learners', 'literacy', 'deep', 'deep learning', 'college students', 'classroom', 'motivation', 'teacher', 'english']	["Relationship between teacher's ability model and students' behavior based on emotion-behavior relevance theory and artificial intelligence technology under the background of curriculum ideological and political education. Purpose: This paper aims to fully understand the relationship between students' classroom emotions and teachers' behaviors in the teaching environment, provide personalized te…	students - teaching - education - teachers - learning - educational - student - academic - ai - writing - college - learners - literacy - deep - deep learning - college students - classroom - motivation - teacher - english	0.538578	FALSE	Review	Adaptive learning environments; Learner characteristics; Learner model; Instructional design; Effectiveness research	2011	142	COMPUTERS IN HUMAN BEHAVIOR
Automated face recognition assists with low-prevalence face identity mismatches but can bias users	-1	-1_ocd_gut_gambling_delirium	NOISE	['ocd', 'gut', 'gambling', 'delirium', 'microbiota', 'obsessive', 'obsessive compulsive', 'compulsive', 'gut microbiota', 'patients', 'obsessive compulsive disorder', 'compulsive disorder', 'microbiome', 'igd', 'speech', 'violent', 'risk', 'machine learning', 'machine', 'using']	['Data-driven identification of subtypes of executive function across typical development, attention deficit hyperactivity disorder, and autism spectrum disorders. Background Impairment of executive function (EF), the goal-directed regulation of thoughts, actions, and emotions, drives negative outcomes and is common across neurodevelopmental disorders including attention deficit hyperactivity dis…	ocd - gut - gambling - delirium - microbiota - obsessive - obsessive compulsive - compulsive - gut microbiota - patients - obsessive compulsive disorder - compulsive disorder - microbiome - igd - speech - violent - risk - machine learning - machine - using	0.529724	FALSE	Article; Early Access	attitudes towards AI; automated face recognition; decision making; deep neural networks; face matching; face recognition	2024	0	BRITISH JOURNAL OF PSYCHOLOGY
Individual fixation tendencies in person viewing generalize from images to videos	17	17_bci_eeg_gaze_eye	Topic23-Brain-Computer Interface	['bci', 'eeg', 'gaze', 'eye', 'brain computer', 'signals', 'mi', 'fnirs', 'brain computer interface', 'classification', 'computer interface', 'signal', 'motor imagery', 'motor', 'bcis', 'computer', 'imagery', 'decoding', 'eeg signals', 'interface']	['Artificial Intelligence Algorithms in Visual Evoked Potential-Based Brain-Computer Interfaces for Motor Rehabilitation Applications: Systematic Review and Future Directions. Brain-Computer Interface (BCI) is a technology that uses electroencephalographic (EEG) signals to control external devices, such as Functional Electrical Stimulation (FES). Visual BCI paradigms based on P300 and Steady Stat…	bci - eeg - gaze - eye - brain computer - signals - mi - fnirs - brain computer interface - classification - computer interface - signal - motor imagery - motor - bcis - computer - imagery - decoding - eeg signals - interface	0.117516	FALSE	Article	eye movements; individual differences; face perception; objects and features; scene perception	2022	6	I-PERCEPTION
Are you for real? Decoding realistic AI-generated faces from neural activity	6	6_facial_music_emotion_faces	Topic9-Affective Computing	['facial', 'music', 'emotion', 'faces', 'emotions', 'recognition', 'expressions', 'face', 'emotion recognition', 'emotional', 'musical', 'facial expressions', 'audio', 'eeg', 'expression', 'features', 'facial expression', 'affective', 'signals', 'valence']	["Facial Expression Emotion Recognition Model Integrating Philosophy and Machine Learning Theory. Facial expression emotion recognition is an intuitive reflection of a person's mental state, which contains rich emotional information, and is one of the most important forms of interpersonal communication. It can be used in various fields, including psychology. As a celebrity in ancient China, Zeng …	facial - music - emotion - faces - emotions - recognition - expressions - face - emotion recognition - emotional - musical - facial expressions - audio - eeg - expression - features - facial expression - affective - signals - valence	0.0753413	FALSE	Article	Face perception; Decoding; Fake faces; Artificial intelligence; Neuroimaging	2022	11	VISION RESEARCH
Effectiveness of a Biofeedback Intervention Targeting Mental and Physical Health Among College Students Through Speech and Physiology as Biomarkers Using Machine Learning: A Randomized Controlled Trial	21	21_sleep_depression_stress_mood	Topic20-Digital Mental Health Monitoring	['sleep', 'depression', 'stress', 'mood', 'digital phenotyping', 'speech', 'features', 'smartphone', 'phenotyping', 'wearable', 'digital', 'data', 'symptoms', 'depressive', 'passive', 'activity', 'vocal', 'physiological', 'typing', 'using']	['Momentary Depression Severity Prediction in Patients With Acute Depression Who Undergo Sleep Deprivation Therapy: Speech-Based Machine Learning Approach. Background: Mobile devices for remote monitoring are inevitable tools to support treatment and patient care, especially in recurrent diseases such as major depressive disorder. The aim of this study was to learn if machine learning (ML) models…	sleep - depression - stress - mood - digital phenotyping - speech - features - smartphone - phenotyping - wearable - digital - data - symptoms - depressive - passive - activity - vocal - physiological - typing - using	1	FALSE	Article	College students; Biofeedback; Speech acoustic features; Formant; Machine learning	2024	0	APPLIED PSYCHOPHYSIOLOGY AND BIOFEEDBACK
Reinforcement learning deficits exhibited by postnatal PCP-treated rats enable deep neural network classification	5	5_schizophrenia_psychosis_patients_controls	Topic8-Schizophrenia Detection	['schizophrenia', 'psychosis', 'patients', 'controls', 'functional', 'patients schizophrenia', 'episode', 'clinical', 'healthy', 'chr', 'schizophrenia patients', 'scz', 'sz', 'antipsychotic', 'healthy controls', 'connectivity', 'fep', 'brain', 'psychotic', 'classification']	['Metacognitive Training Modulates Default-Mode Network Homogeneity During 8-Week Olanzapine Treatment in Patients With Schizophrenia. Background Previous studies have revealed the efficacy of metacognitive training for schizophrenia. However, the underlying mechanisms of metacognitive training on brain function alterations, including the default-mode network (DMN), remain unknown. The present st…	schizophrenia - psychosis - patients - controls - functional - patients schizophrenia - episode - clinical - healthy - chr - schizophrenia patients - scz - sz - antipsychotic - healthy controls - connectivity - fep - brain - psychotic - classification	0.120302	FALSE	Article		2023	5	NEUROPSYCHOPHARMACOLOGY
Conceptions of Efficiency: Applications in Learning and Problem Solving	2	2_students_teaching_education_teachers	Topic4-AI in Educational Psychology	['students', 'teaching', 'education', 'teachers', 'learning', 'educational', 'student', 'academic', 'ai', 'writing', 'college', 'learners', 'literacy', 'deep', 'deep learning', 'college students', 'classroom', 'motivation', 'teacher', 'english']	["Relationship between teacher's ability model and students' behavior based on emotion-behavior relevance theory and artificial intelligence technology under the background of curriculum ideological and political education. Purpose: This paper aims to fully understand the relationship between students' classroom emotions and teachers' behaviors in the teaching environment, provide personalized te…	students - teaching - education - teachers - learning - educational - student - academic - ai - writing - college - learners - literacy - deep - deep learning - college students - classroom - motivation - teacher - english	1	FALSE	Article		2010	85	EDUCATIONAL PSYCHOLOGIST
Machine Learning for Supplementing Behavioral Assessment	18	18_item_simulation_missing_dif	Topic16-ML in Psychometrics	['item', 'simulation', 'missing', 'dif', 'data', 'imputation', 'methods', 'method', 'missing data', 'variables', 'mathematics', 'reading', 'pisa', 'bayesian', 'machine learning', 'modeling', 'items', 'model', 'approach', 'estimation']	['One Model to Rule Them All? Using Machine Learning Algorithms to Determine the Number of Factors in Exploratory Factor Analysis. Determining the number of factors is one of the most crucial decisions a researcher has to face when conducting an exploratory factor analysis. As no common factor retention criterion can be seen as generally superior, a new approach is proposed-combining extensive da…	item - simulation - missing - dif - data - imputation - methods - method - missing data - variables - mathematics - reading - pisa - bayesian - machine learning - modeling - items - model - approach - estimation	1	FALSE	Article	Indirect assessment; Functional analysis; QABF; Machine learning	2021	6	PERSPECTIVES ON BEHAVIOR SCIENCE
The interplay between scientific motivation, creative process engagement, and scientific creativity: A network analysis study	22	22_creativity_creative_art_aesthetic	Topic26-AI in Creativity Research	['creativity', 'creative', 'art', 'aesthetic', 'artworks', 'ai', 'human', 'human creativity', 'artwork', 'divergent', 'artistic', 'image', 'originality', 'thinking', 'semantic distance', 'painting', 'artists', 'paintings', 'creative process', 'literary']	["Art therapy to control nail biting using a cognitive behavioral approach through new innovative game and animation. BackgroundNail biting is categorized as a habitual behavior, commonly observed in children and occasionally in adults. This disorder occurs unconsciously, with individuals often unaware of their behavior. Since there are physical and psychological complications and quality of life…	creativity - creative - art - aesthetic - artworks - ai - human - human creativity - artwork - divergent - artistic - image - originality - thinking - semantic distance - painting - artists - paintings - creative process - literary	1	TRUE	Article	Scientific motivation; Creative process engagement; Scientific creativity; Network analysis	2024	1	LEARNING AND INDIVIDUAL DIFFERENCES
Application of deep transfer learning for automated brain abnormality classification using MR images	8	8_ad_dementia_mci_alzheimer	Topic10-Alzheimer Detection	['ad', 'dementia', 'mci', 'alzheimer', 'disease', 'alzheimer disease', 'age', 'cognitive impairment', 'brain age', 'brain', 'cognitive', 'impairment', 'aging', 'mild', 'mild cognitive', 'mild cognitive impairment', 'mri', 'aphasia', 'lesion', 'speech']	["Plasma d-glutamate levels for detecting mild cognitive impairment and Alzheimer's disease: Machine learning approaches. Background: d-glutamate, which is involved in N-methyl-d-aspartate receptor modulation, may be associated with cognitive ageing. Aims: This study aimed to use peripheral plasma d-glutamate levels to differentiate patients with mild cognitive impairment (MCI) and Alzheimer's di…	ad - dementia - mci - alzheimer - disease - alzheimer disease - age - cognitive impairment - brain age - brain - cognitive - impairment - aging - mild - mild cognitive - mild cognitive impairment - mri - aphasia - lesion - speech	0.140313	FALSE	Article	MRI classification; Abnormal brain images; Deep transfer learning; CNN	2019	294	COGNITIVE SYSTEMS RESEARCH
Longitudinal Cognitive Diagnostic Assessment Based on the HMM/ANN Model	18	18_item_simulation_missing_dif	Topic16-ML in Psychometrics	['item', 'simulation', 'missing', 'dif', 'data', 'imputation', 'methods', 'method', 'missing data', 'variables', 'mathematics', 'reading', 'pisa', 'bayesian', 'machine learning', 'modeling', 'items', 'model', 'approach', 'estimation']	['One Model to Rule Them All? Using Machine Learning Algorithms to Determine the Number of Factors in Exploratory Factor Analysis. Determining the number of factors is one of the most crucial decisions a researcher has to face when conducting an exploratory factor analysis. As no common factor retention criterion can be seen as generally superior, a new approach is proposed-combining extensive da…	item - simulation - missing - dif - data - imputation - methods - method - missing data - variables - mathematics - reading - pisa - bayesian - machine learning - modeling - items - model - approach - estimation	1	FALSE	Article	cognitive diagnostic assessment; longitudinal assessment; hidden Markov model; SSOM neural network; reading comprehension	2020	11	FRONTIERS IN PSYCHOLOGY
The dynamics of bidirectional thought	0	0_language_cognitive_word_computational	Topic1-Human Cognitive Science	['language', 'cognitive', 'word', 'computational', 'neural', 'human', 'representations', 'models', 'cognition', 'knowledge', 'model', 'semantic', 'artificial', 'learning', 'words', 'information', 'cognitive science', 'reasoning', 'representation', 'intelligence']	['Artificial intelligence, human cognition, and conscious supremacy. The computational significance of consciousness is an important and potentially more tractable research theme than the hard problem of consciousness, as one could look at the correlation of consciousness and computational capacities through, e.g., algorithmic or complexity analyses. In the literature, consciousness is defined as…	language - cognitive - word - computational - neural - human - representations - models - cognition - knowledge - model - semantic - artificial - learning - words - information - cognitive science - reasoning - representation - intelligence	0.489853	FALSE	Article	Judgement and decision-making; bidirectionality; constraint satisfaction; neural networks	2016	5	THINKING & REASONING
Neural networks as a critical level of description for cognitive neuroscience	0	0_language_cognitive_word_computational	Topic1-Human Cognitive Science	['language', 'cognitive', 'word', 'computational', 'neural', 'human', 'representations', 'models', 'cognition', 'knowledge', 'model', 'semantic', 'artificial', 'learning', 'words', 'information', 'cognitive science', 'reasoning', 'representation', 'intelligence']	['Artificial intelligence, human cognition, and conscious supremacy. The computational significance of consciousness is an important and potentially more tractable research theme than the hard problem of consciousness, as one could look at the correlation of consciousness and computational capacities through, e.g., algorithmic or complexity analyses. In the literature, consciousness is defined as…	language - cognitive - word - computational - neural - human - representations - models - cognition - knowledge - model - semantic - artificial - learning - words - information - cognitive science - reasoning - representation - intelligence	0.601359	FALSE	Article		2020	1	CURRENT OPINION IN BEHAVIORAL SCIENCES
A Bayesian network analysis of posttraumatic stress disorder symptoms in adults reporting childhood sexual abuse	19	19_ptsd_trauma_stress disorder_posttraumatic	Topic15-PTSD Detection	['ptsd', 'trauma', 'stress disorder', 'posttraumatic', 'stress', 'posttraumatic stress', 'traumatic', 'symptoms', 'posttraumatic stress disorder', 'childhood', 'stress disorder ptsd', 'disorder ptsd', 'abuse', 'maltreatment', 'traumatic stress', 'exposure', 'post traumatic', 'disorder', 'veterans', 'post traumatic stress']	['Hippocampal Resting-State Functional Connectivity Forecasts Individual Posttraumatic Stress Disorder Symptoms: A Data-Driven Approach. BACKGROUND: Posttraumatic stress disorder (PTSD) is a debilitating disorder, and there is no current accurate prediction of who develops it after trauma. Neurobiologically, individuals with chronic PTSD exhibit aberrant resting-state functional connectivity (rsF…	ptsd - trauma - stress disorder - posttraumatic - stress - posttraumatic stress - traumatic - symptoms - posttraumatic stress disorder - childhood - stress disorder ptsd - disorder ptsd - abuse - maltreatment - traumatic stress - exposure - post traumatic - disorder - veterans - post traumatic stress	0.108049	FALSE	Article	Network analysis; directed acyclic graph; PTSD; childhood sexual abuse	2017	180	EUROPEAN JOURNAL OF PSYCHOTRAUMATOLOGY
Investigating the other race effect: Human and computer face matching and similarity judgements	6	6_facial_music_emotion_faces	Topic9-Affective Computing	['facial', 'music', 'emotion', 'faces', 'emotions', 'recognition', 'expressions', 'face', 'emotion recognition', 'emotional', 'musical', 'facial expressions', 'audio', 'eeg', 'expression', 'features', 'facial expression', 'affective', 'signals', 'valence']	["Facial Expression Emotion Recognition Model Integrating Philosophy and Machine Learning Theory. Facial expression emotion recognition is an intuitive reflection of a person's mental state, which contains rich emotional information, and is one of the most important forms of interpersonal communication. It can be used in various fields, including psychology. As a celebrity in ancient China, Zeng …	facial - music - emotion - faces - emotions - recognition - expressions - face - emotion recognition - emotional - musical - facial expressions - audio - eeg - expression - features - facial expression - affective - signals - valence	0.0740993	FALSE	Article; Early Access	Unfamiliar face matching; other race effect; automatic face recognition	2023	3	VISUAL COGNITION
Measurement and identification of mental workload during simulated computer tasks with multimodal methods and machine learning	24	24_driving_workload_driver_drivers	Topic25-Mental Workload Evaluation	['driving', 'workload', 'driver', 'drivers', 'mental workload', 'traffic', 'road', 'vehicle', 'distraction', 'cognitive load', 'load', 'pedestrian', 'safety', 'task', 'cognitive workload', 'fatigue', 'physiological', 'simulator', 'drowsiness', 'eye']	["Driver's mental workload classification using physiological, traffic flow and environmental factors. During the dynamic driving process, classification of mental workload for drivers is a complex task due to multiple factors, including human, vehicle, road, and the environment. Many current studies focus on the impacts of a single factor, such as physiological signal, lane changing, and so on, …	driving - workload - driver - drivers - mental workload - traffic - road - vehicle - distraction - cognitive load - load - pedestrian - safety - task - cognitive workload - fatigue - physiological - simulator - drowsiness - eye	1	FALSE	Article	Mental workload; multi-modal measures; psychophysiology; machine learning; workload classification	2020	66	ERGONOMICS
Individual differences in internal models explain idiosyncrasies in scene perception	14	14_visual_object_objects_category	Topic11-Visual Processing Mechanism and Modeling	['visual', 'object', 'objects', 'category', 'scene', 'image', 'images', 'vision', 'similarity', 'categorization', 'representations', 'shape', 'categories', 'stimuli', 'scenes', 'neural', 'cnns', 'recognition', 'memory', 'networks']	['A failure to learn object shape geometry: Implications for convolutional neural networks as plausible models of biological vision. Here we examine the plausibility of deep convolutional neural networks (CNNs) as a theoretical framework for understanding biological vision in the context of image classification. Recent work on object recognition in human vision has shown that both global, and loc…	visual - object - objects - category - scene - image - images - vision - similarity - categorization - representations - shape - categories - stimuli - scenes - neural - cnns - recognition - memory - networks	0.431058	FALSE	Article	Scene perception; Individual differences; Drawing; Predictive processing; Internal models	2024	1	COGNITION
Considering How Machine-Learning Algorithms (Re)produce Social Biases in Generated Faces	6	6_facial_music_emotion_faces	Topic9-Affective Computing	['facial', 'music', 'emotion', 'faces', 'emotions', 'recognition', 'expressions', 'face', 'emotion recognition', 'emotional', 'musical', 'facial expressions', 'audio', 'eeg', 'expression', 'features', 'facial expression', 'affective', 'signals', 'valence']	["Facial Expression Emotion Recognition Model Integrating Philosophy and Machine Learning Theory. Facial expression emotion recognition is an intuitive reflection of a person's mental state, which contains rich emotional information, and is one of the most important forms of interpersonal communication. It can be used in various fields, including psychology. As a celebrity in ancient China, Zeng …	facial - music - emotion - faces - emotions - recognition - expressions - face - emotion recognition - emotional - musical - facial expressions - audio - eeg - expression - features - facial expression - affective - signals - valence	0.0808121	FALSE	Review	bias; face perception; machine learning; methods	2024	0	SOCIAL AND PERSONALITY PSYCHOLOGY COMPASS
Machine learning and Bayesian network analyses identifies associations with insomnia in a national sample of 31,285 treatment-seeking college students	19	19_ptsd_trauma_stress disorder_posttraumatic	Topic15-PTSD Detection	['ptsd', 'trauma', 'stress disorder', 'posttraumatic', 'stress', 'posttraumatic stress', 'traumatic', 'symptoms', 'posttraumatic stress disorder', 'childhood', 'stress disorder ptsd', 'disorder ptsd', 'abuse', 'maltreatment', 'traumatic stress', 'exposure', 'post traumatic', 'disorder', 'veterans', 'post traumatic stress']	['Hippocampal Resting-State Functional Connectivity Forecasts Individual Posttraumatic Stress Disorder Symptoms: A Data-Driven Approach. BACKGROUND: Posttraumatic stress disorder (PTSD) is a debilitating disorder, and there is no current accurate prediction of who develops it after trauma. Neurobiologically, individuals with chronic PTSD exhibit aberrant resting-state functional connectivity (rsF…	ptsd - trauma - stress disorder - posttraumatic - stress - posttraumatic stress - traumatic - symptoms - posttraumatic stress disorder - childhood - stress disorder ptsd - disorder ptsd - abuse - maltreatment - traumatic stress - exposure - post traumatic - disorder - veterans - post traumatic stress	0.0735328	FALSE	Article	Insomnia; Comorbidities; College students; Machine learning; Bayesian network analysis	2024	0	BMC PSYCHIATRY
The best game in town: The reemergence of the language-of-thought hypothesis across the cognitive sciences	0	0_language_cognitive_word_computational	Topic1-Human Cognitive Science	['language', 'cognitive', 'word', 'computational', 'neural', 'human', 'representations', 'models', 'cognition', 'knowledge', 'model', 'semantic', 'artificial', 'learning', 'words', 'information', 'cognitive science', 'reasoning', 'representation', 'intelligence']	['Artificial intelligence, human cognition, and conscious supremacy. The computational significance of consciousness is an important and potentially more tractable research theme than the hard problem of consciousness, as one could look at the correlation of consciousness and computational capacities through, e.g., algorithmic or complexity analyses. In the literature, consciousness is defined as…	language - cognitive - word - computational - neural - human - representations - models - cognition - knowledge - model - semantic - artificial - learning - words - information - cognitive science - reasoning - representation - intelligence	0.318695	FALSE	Article	animal cognition; automaticity; cognitive architecture; deep learning; dual-process theories; implicit attitudes; infant cognition; language-of-thought; object files; visual cognition	2022	55	BEHAVIORAL AND BRAIN SCIENCES
Do Advanced Statistical Techniques Really Help in the Diagnosis of the Metabolic Syndrome in Patients Treated With Second-Generation Antipsychotics?	5	5_schizophrenia_psychosis_patients_controls	Topic8-Schizophrenia Detection	['schizophrenia', 'psychosis', 'patients', 'controls', 'functional', 'patients schizophrenia', 'episode', 'clinical', 'healthy', 'chr', 'schizophrenia patients', 'scz', 'sz', 'antipsychotic', 'healthy controls', 'connectivity', 'fep', 'brain', 'psychotic', 'classification']	['Metacognitive Training Modulates Default-Mode Network Homogeneity During 8-Week Olanzapine Treatment in Patients With Schizophrenia. Background Previous studies have revealed the efficacy of metacognitive training for schizophrenia. However, the underlying mechanisms of metacognitive training on brain function alterations, including the default-mode network (DMN), remain unknown. The present st…	schizophrenia - psychosis - patients - controls - functional - patients schizophrenia - episode - clinical - healthy - chr - schizophrenia patients - scz - sz - antipsychotic - healthy controls - connectivity - fep - brain - psychotic - classification	0.135361	FALSE	Article	Antipsychotics; Diagnosis/Diagnostic Tools; Metabolic Disorders; Research Methods and Statistics	2015	5	JOURNAL OF CLINICAL PSYCHIATRY
Sex Differences in Complex Posttraumatic Stress Disorder Network among Chinese Young Adults	19	19_ptsd_trauma_stress disorder_posttraumatic	Topic15-PTSD Detection	['ptsd', 'trauma', 'stress disorder', 'posttraumatic', 'stress', 'posttraumatic stress', 'traumatic', 'symptoms', 'posttraumatic stress disorder', 'childhood', 'stress disorder ptsd', 'disorder ptsd', 'abuse', 'maltreatment', 'traumatic stress', 'exposure', 'post traumatic', 'disorder', 'veterans', 'post traumatic stress']	['Hippocampal Resting-State Functional Connectivity Forecasts Individual Posttraumatic Stress Disorder Symptoms: A Data-Driven Approach. BACKGROUND: Posttraumatic stress disorder (PTSD) is a debilitating disorder, and there is no current accurate prediction of who develops it after trauma. Neurobiologically, individuals with chronic PTSD exhibit aberrant resting-state functional connectivity (rsF…	ptsd - trauma - stress disorder - posttraumatic - stress - posttraumatic stress - traumatic - symptoms - posttraumatic stress disorder - childhood - stress disorder ptsd - disorder ptsd - abuse - maltreatment - traumatic stress - exposure - post traumatic - disorder - veterans - post traumatic stress	0.12128	FALSE	Article	complex posttraumatic stress disorder; network analysis; sex differences; China	2023	2	BEHAVIORAL SCIENCES
A complementary SEM and deep ANN approach to predict the adoption of cryptocurrencies from the perspective of cybersecurity	13	13_consumers_service_consumer_customer	Topic17-Intelligent Assistant and User Experience	['consumers', 'service', 'consumer', 'customer', 'intention', 'perceived', 'ai', 'chatbots', 'customers', 'chatbot', 'robots', 'purchase', 'brand', 'marketing', 'metaverse', 'technology', 'adoption', 'virtual', 'assistants', 'trust']	["Exploring users' adoption intentions of intelligent virtual assistants in financial services: An anthropomorphic perspectives and socio-psychological perspectives. With artificial intelligence entering all spheres of technology, it has also prompted financial businesses to enter into Intelligent Financial Technologies (FinTech). Chatbots and virtual assistants all are examples of how AI is used…	consumers - service - consumer - customer - intention - perceived - ai - chatbots - customers - chatbot - robots - purchase - brand - marketing - metaverse - technology - adoption - virtual - assistants - trust	0.178204	FALSE	Article	Cybersecurity; Cryptocurrency; SEM; Deep ANN	2023	18	COMPUTERS IN HUMAN BEHAVIOR
Deficits in Prediction Ability Trigger Asymmetries in Behavior and Internal Representation	7	7_asd_autism_autism spectrum_autism spectrum disorder	Topic12-Autism Detection	['asd', 'autism', 'autism spectrum', 'autism spectrum disorder', 'spectrum disorder', 'spectrum', 'children', 'autistic', 'spectrum disorder asd', 'disorder asd', 'children asd', 'disorder', 'td', 'children autism', 'individuals asd', 'neurodevelopmental', 'social', 'typically developing', 'children autism spectrum', 'toddlers']	['Aberrant Functional Connectivity of Neural Circuits Associated with Social and Sensorimotor Deficits in Young Children with Autism Spectrum Disorder. Autism spectrum disorder (ASD) is a neurodevelopmental disorder characterized by atypical functional integration of brain regions. The vast majority of neuroimaging studies of ASD have focused on older children, adolescents, and adults with the di…	asd - autism - autism spectrum - autism spectrum disorder - spectrum disorder - spectrum - children - autistic - spectrum disorder asd - disorder asd - children asd - disorder - td - children autism - individuals asd - neurodevelopmental - social - typically developing - children autism spectrum - toddlers	0.290004	FALSE	Review	predictive coding; computational modeling; recurrent neural networks; internal representation; autism spectrum disorder	2020	7	FRONTIERS IN PSYCHIATRY
Domain adaptation spatial feature perception neural network for cross-subject EEG emotion recognition	6	6_facial_music_emotion_faces	Topic9-Affective Computing	['facial', 'music', 'emotion', 'faces', 'emotions', 'recognition', 'expressions', 'face', 'emotion recognition', 'emotional', 'musical', 'facial expressions', 'audio', 'eeg', 'expression', 'features', 'facial expression', 'affective', 'signals', 'valence']	["Facial Expression Emotion Recognition Model Integrating Philosophy and Machine Learning Theory. Facial expression emotion recognition is an intuitive reflection of a person's mental state, which contains rich emotional information, and is one of the most important forms of interpersonal communication. It can be used in various fields, including psychology. As a celebrity in ancient China, Zeng …	facial - music - emotion - faces - emotions - recognition - expressions - face - emotion recognition - emotional - musical - facial expressions - audio - eeg - expression - features - facial expression - affective - signals - valence	1	FALSE	Article	affective computing; electroencephalography; emotion recognition; convolutional neural network; graph attention network; domain adaptation	2024	0	FRONTIERS IN HUMAN NEUROSCIENCE
Assessing the Effectiveness of Automated Emotion Recognition in Adults and Children for Clinical Investigation	6	6_facial_music_emotion_faces	Topic9-Affective Computing	['facial', 'music', 'emotion', 'faces', 'emotions', 'recognition', 'expressions', 'face', 'emotion recognition', 'emotional', 'musical', 'facial expressions', 'audio', 'eeg', 'expression', 'features', 'facial expression', 'affective', 'signals', 'valence']	["Facial Expression Emotion Recognition Model Integrating Philosophy and Machine Learning Theory. Facial expression emotion recognition is an intuitive reflection of a person's mental state, which contains rich emotional information, and is one of the most important forms of interpersonal communication. It can be used in various fields, including psychology. As a celebrity in ancient China, Zeng …	facial - music - emotion - faces - emotions - recognition - expressions - face - emotion recognition - emotional - musical - facial expressions - audio - eeg - expression - features - facial expression - affective - signals - valence	1	FALSE	Article	emotion; brain; artificial neural network; computing; clinical investigation	2020	15	FRONTIERS IN HUMAN NEUROSCIENCE
A unified model of human semantic knowledge and its disorders	0	0_language_cognitive_word_computational	Topic1-Human Cognitive Science	['language', 'cognitive', 'word', 'computational', 'neural', 'human', 'representations', 'models', 'cognition', 'knowledge', 'model', 'semantic', 'artificial', 'learning', 'words', 'information', 'cognitive science', 'reasoning', 'representation', 'intelligence']	['Artificial intelligence, human cognition, and conscious supremacy. The computational significance of consciousness is an important and potentially more tractable research theme than the hard problem of consciousness, as one could look at the correlation of consciousness and computational capacities through, e.g., algorithmic or complexity analyses. In the literature, consciousness is defined as…	language - cognitive - word - computational - neural - human - representations - models - cognition - knowledge - model - semantic - artificial - learning - words - information - cognitive science - reasoning - representation - intelligence	0.346219	FALSE	Article		2017	114	NATURE HUMAN BEHAVIOUR
Are Causal Structure and Intervention Judgments Inextricably Linked? A Developmental Study	0	0_language_cognitive_word_computational	Topic1-Human Cognitive Science	['language', 'cognitive', 'word', 'computational', 'neural', 'human', 'representations', 'models', 'cognition', 'knowledge', 'model', 'semantic', 'artificial', 'learning', 'words', 'information', 'cognitive science', 'reasoning', 'representation', 'intelligence']	['Artificial intelligence, human cognition, and conscious supremacy. The computational significance of consciousness is an important and potentially more tractable research theme than the hard problem of consciousness, as one could look at the correlation of consciousness and computational capacities through, e.g., algorithmic or complexity analyses. In the literature, consciousness is defined as…	language - cognitive - word - computational - neural - human - representations - models - cognition - knowledge - model - semantic - artificial - learning - words - information - cognitive science - reasoning - representation - intelligence	0.0899502	FALSE	Article	Causation; Causal reasoning; Counterfactual reasoning; Development	2012	20	COGNITIVE SCIENCE
Linguistic representation of vowels in speech imagery EEG	17	17_bci_eeg_gaze_eye	Topic23-Brain-Computer Interface	['bci', 'eeg', 'gaze', 'eye', 'brain computer', 'signals', 'mi', 'fnirs', 'brain computer interface', 'classification', 'computer interface', 'signal', 'motor imagery', 'motor', 'bcis', 'computer', 'imagery', 'decoding', 'eeg signals', 'interface']	['Artificial Intelligence Algorithms in Visual Evoked Potential-Based Brain-Computer Interfaces for Motor Rehabilitation Applications: Systematic Review and Future Directions. Brain-Computer Interface (BCI) is a technology that uses electroencephalographic (EEG) signals to control external devices, such as Functional Electrical Stimulation (FES). Visual BCI paradigms based on P300 and Steady Stat…	bci - eeg - gaze - eye - brain computer - signals - mi - fnirs - brain computer interface - classification - computer interface - signal - motor imagery - motor - bcis - computer - imagery - decoding - eeg signals - interface	1	FALSE	Article	EEG; speech imagery; linguistic representation; vowels; labeling syllables	2023	0	FRONTIERS IN HUMAN NEUROSCIENCE
Infant AFAR: Automated facial action recognition in infants	6	6_facial_music_emotion_faces	Topic9-Affective Computing	['facial', 'music', 'emotion', 'faces', 'emotions', 'recognition', 'expressions', 'face', 'emotion recognition', 'emotional', 'musical', 'facial expressions', 'audio', 'eeg', 'expression', 'features', 'facial expression', 'affective', 'signals', 'valence']	["Facial Expression Emotion Recognition Model Integrating Philosophy and Machine Learning Theory. Facial expression emotion recognition is an intuitive reflection of a person's mental state, which contains rich emotional information, and is one of the most important forms of interpersonal communication. It can be used in various fields, including psychology. As a celebrity in ancient China, Zeng …	facial - music - emotion - faces - emotions - recognition - expressions - face - emotion recognition - emotional - musical - facial expressions - audio - eeg - expression - features - facial expression - affective - signals - valence	1	FALSE	Article	Automatic facial action unit detection; Facial action coding system; Infant behavior; Cross domain generalizability; Deep learning	2023	15	BEHAVIOR RESEARCH METHODS
Distinguishing the relevant features of frequent suicide attempters	4	4_suicide_suicidal_risk_suicide risk	Topic7-Suicide Prediction	['suicide', 'suicidal', 'risk', 'suicide risk', 'ideation', 'suicidal ideation', 'suicide attempts', 'attempts', 'suicide attempt', 'attempt', 'posts', 'health', 'si', 'suicidality', 'prevention', 'suicide prevention', 'self harm', 'death', 'risk suicide', 'suicidal behavior']	["Prediction of Sex-Specific Suicide Risk Using Machine Learning and Single-Payer Health Care Registry Data From Denmark. IMPORTANCE Suicide is a public health problem, with multiple causes that are poorly understood. The increased focus on combining health care data with machine-learning approaches in psychiatry may help advance the understanding of suicide risk. OBJECTIVE To examine sex-specifi…	suicide - suicidal - risk - suicide risk - ideation - suicidal ideation - suicide attempts - attempts - suicide attempt - attempt - posts - health - si - suicidality - prevention - suicide prevention - self harm - death - risk suicide - suicidal behavior	1	FALSE	Article	Suicide attempt; Anxiety disorders; Suicide; Data mining; Bayesian networks	2011	67	JOURNAL OF PSYCHIATRIC RESEARCH
Affective Cognition of Students' Autonomous Learning in College English Teaching Based on Deep Learning	6	6_facial_music_emotion_faces	Topic9-Affective Computing	['facial', 'music', 'emotion', 'faces', 'emotions', 'recognition', 'expressions', 'face', 'emotion recognition', 'emotional', 'musical', 'facial expressions', 'audio', 'eeg', 'expression', 'features', 'facial expression', 'affective', 'signals', 'valence']	["Facial Expression Emotion Recognition Model Integrating Philosophy and Machine Learning Theory. Facial expression emotion recognition is an intuitive reflection of a person's mental state, which contains rich emotional information, and is one of the most important forms of interpersonal communication. It can be used in various fields, including psychology. As a celebrity in ancient China, Zeng …	facial - music - emotion - faces - emotions - recognition - expressions - face - emotion recognition - emotional - musical - facial expressions - audio - eeg - expression - features - facial expression - affective - signals - valence	0.129859	FALSE	Article	cognitive activities; English learning; deep learning; emotional interactions; mining learning	2022	7	FRONTIERS IN PSYCHOLOGY
Numerosities and Other Magnitudes in the Brains: A Comparative View	0	0_language_cognitive_word_computational	Topic1-Human Cognitive Science	['language', 'cognitive', 'word', 'computational', 'neural', 'human', 'representations', 'models', 'cognition', 'knowledge', 'model', 'semantic', 'artificial', 'learning', 'words', 'information', 'cognitive science', 'reasoning', 'representation', 'intelligence']	['Artificial intelligence, human cognition, and conscious supremacy. The computational significance of consciousness is an important and potentially more tractable research theme than the hard problem of consciousness, as one could look at the correlation of consciousness and computational capacities through, e.g., algorithmic or complexity analyses. In the literature, consciousness is defined as…	language - cognitive - word - computational - neural - human - representations - models - cognition - knowledge - model - semantic - artificial - learning - words - information - cognitive science - reasoning - representation - intelligence	0.0991861	FALSE	Review	brain; numerosity; number; comparative cognition; comparative neurobiology; approximate number system	2021	26	FRONTIERS IN PSYCHOLOGY
EEG-based investigation of effects of mindfulness meditation training on state and trait by deep learning and traditional machine learning	1	1_depression_treatment_health_covid	Topic2-AI Assisted Depression Treatment	['depression', 'treatment', 'health', 'covid', 'anxiety', 'covid 19', '19', 'pandemic', 'mental', 'depressive', 'antidepressant', 'symptoms', 'predictors', 'machine learning', 'mental health', 'clinical', 'machine', 'psychiatric', 'patients', 'prediction']	['Mental health after the COVID-19 pandemic among Finnish youth: a repeated, cross-sectional, population-based study. Background High levels of mental health problems among young people were reported during the COVID-19 pandemic, but studies of the post-pandemic period are scarce. We assessed mental health problems among Finnish youth before, during, and after the COVID-19 pandemic using nationwi…	depression - treatment - health - covid - anxiety - covid 19 - 19 - pandemic - mental - depressive - antidepressant - symptoms - predictors - machine learning - mental health - clinical - machine - psychiatric - patients - prediction	0.157134	FALSE	Article	meditation state classification; deep learning; electroencephalogram (EEG); state and trait characteristics; convolutional neural networks (CNN); mindfulness-based stress reduction (MBSR); filter bank common spatial pattern (FBCSP)	2023	3	FRONTIERS IN HUMAN NEUROSCIENCE
Discriminating signal from noise: Recognition of a movement-based animal display by artificial neural networks	14	14_visual_object_objects_category	Topic11-Visual Processing Mechanism and Modeling	['visual', 'object', 'objects', 'category', 'scene', 'image', 'images', 'vision', 'similarity', 'categorization', 'representations', 'shape', 'categories', 'stimuli', 'scenes', 'neural', 'cnns', 'recognition', 'memory', 'networks']	['A failure to learn object shape geometry: Implications for convolutional neural networks as plausible models of biological vision. Here we examine the plausibility of deep convolutional neural networks (CNNs) as a theoretical framework for understanding biological vision in the context of image classification. Recent work on object recognition in human vision has shown that both global, and loc…	visual - object - objects - category - scene - image - images - vision - similarity - categorization - representations - shape - categories - stimuli - scenes - neural - cnns - recognition - memory - networks	0.122643	FALSE	Article	lizards; animal communication; movement; neural network; classification	2006	3	BEHAVIOURAL PROCESSES
Self-Relevance Predicts the Aesthetic Appeal of Real and Synthetic Artworks Generated via Neural Style Transfer	22	22_creativity_creative_art_aesthetic	Topic26-AI in Creativity Research	['creativity', 'creative', 'art', 'aesthetic', 'artworks', 'ai', 'human', 'human creativity', 'artwork', 'divergent', 'artistic', 'image', 'originality', 'thinking', 'semantic distance', 'painting', 'artists', 'paintings', 'creative process', 'literary']	["Art therapy to control nail biting using a cognitive behavioral approach through new innovative game and animation. BackgroundNail biting is categorized as a habitual behavior, commonly observed in children and occasionally in adults. This disorder occurs unconsciously, with individuals often unaware of their behavior. Since there are physical and psychological complications and quality of life…	creativity - creative - art - aesthetic - artworks - ai - human - human creativity - artwork - divergent - artistic - image - originality - thinking - semantic distance - painting - artists - paintings - creative process - literary	0.395885	FALSE	Article; Early Access	aesthetic valuation; artwork; identity; machine learning; open data	2023	10	PSYCHOLOGICAL SCIENCE
News Text Mining-Based Business Sentiment Analysis and Its Significance in Economy	3	3_personality_media_sentiment_social	Topic3-ML-based Personality Assessment	['personality', 'media', 'sentiment', 'social', 'social media', 'text', 'language', 'twitter', 'big', 'online', 'users', 'sentiment analysis', 'traits', 'natural language', 'news', 'content', 'public', 'analysis', 'data', 'psychological']	["Exploring a Language-Based Interest Assessment: Predicting Vocational Interests on Social Media Using Natural Language Processing. For more than a century, self-report inventories have been the traditional method for assessing vocational interests. Little research has examined the use of machine learning techniques, such as natural language processing (NLP), in interest assessment. This paper e…	personality - media - sentiment - social - social media - text - language - twitter - big - online - users - sentiment analysis - traits - natural language - news - content - public - analysis - data - psychological	0.0699538	FALSE	Article	business sentiment analysis; text mining; convolutional neural network; economy; artificial intelligence	2022	4	FRONTIERS IN PSYCHOLOGY
The Affective Dynamics of Everyday Digital Life: Opening Computational Possibility	6	6_facial_music_emotion_faces	Topic9-Affective Computing	['facial', 'music', 'emotion', 'faces', 'emotions', 'recognition', 'expressions', 'face', 'emotion recognition', 'emotional', 'musical', 'facial expressions', 'audio', 'eeg', 'expression', 'features', 'facial expression', 'affective', 'signals', 'valence']	["Facial Expression Emotion Recognition Model Integrating Philosophy and Machine Learning Theory. Facial expression emotion recognition is an intuitive reflection of a person's mental state, which contains rich emotional information, and is one of the most important forms of interpersonal communication. It can be used in various fields, including psychology. As a celebrity in ancient China, Zeng …	facial - music - emotion - faces - emotions - recognition - expressions - face - emotion recognition - emotional - musical - facial expressions - audio - eeg - expression - features - facial expression - affective - signals - valence	1	FALSE	Article	Longitudinal; Intraindividual variability; Screenomics; Machine learning; Media effects	2023	4	AFFECTIVE SCIENCE
Classification of Adolescent Psychiatric Patients at High Risk of Suicide Using the Personality Assessment Inventory by Machine Learning	4	4_suicide_suicidal_risk_suicide risk	Topic7-Suicide Prediction	['suicide', 'suicidal', 'risk', 'suicide risk', 'ideation', 'suicidal ideation', 'suicide attempts', 'attempts', 'suicide attempt', 'attempt', 'posts', 'health', 'si', 'suicidality', 'prevention', 'suicide prevention', 'self harm', 'death', 'risk suicide', 'suicidal behavior']	["Prediction of Sex-Specific Suicide Risk Using Machine Learning and Single-Payer Health Care Registry Data From Denmark. IMPORTANCE Suicide is a public health problem, with multiple causes that are poorly understood. The increased focus on combining health care data with machine-learning approaches in psychiatry may help advance the understanding of suicide risk. OBJECTIVE To examine sex-specifi…	suicide - suicidal - risk - suicide risk - ideation - suicidal ideation - suicide attempts - attempts - suicide attempt - attempt - posts - health - si - suicidality - prevention - suicide prevention - self harm - death - risk suicide - suicidal behavior	1	FALSE	Article	Suicide; Child and adolescent psychiatry; Machine learning; Personality Assessment Inventory-Adolescent	2021	7	PSYCHIATRY INVESTIGATION
Educational Psychology-Based Strategy for Instrumental Music Teaching in Normal College	6	6_facial_music_emotion_faces	Topic9-Affective Computing	['facial', 'music', 'emotion', 'faces', 'emotions', 'recognition', 'expressions', 'face', 'emotion recognition', 'emotional', 'musical', 'facial expressions', 'audio', 'eeg', 'expression', 'features', 'facial expression', 'affective', 'signals', 'valence']	["Facial Expression Emotion Recognition Model Integrating Philosophy and Machine Learning Theory. Facial expression emotion recognition is an intuitive reflection of a person's mental state, which contains rich emotional information, and is one of the most important forms of interpersonal communication. It can be used in various fields, including psychology. As a celebrity in ancient China, Zeng …	facial - music - emotion - faces - emotions - recognition - expressions - face - emotion recognition - emotional - musical - facial expressions - audio - eeg - expression - features - facial expression - affective - signals - valence	0.0565385	FALSE	Article	normal college; instrumental music teaching; musical teaching strategy; teaching mode; music teaching methods	2021	2	FRONTIERS IN PSYCHOLOGY
Brief category learning distorts perceptual space for complex scenes	14	14_visual_object_objects_category	Topic11-Visual Processing Mechanism and Modeling	['visual', 'object', 'objects', 'category', 'scene', 'image', 'images', 'vision', 'similarity', 'categorization', 'representations', 'shape', 'categories', 'stimuli', 'scenes', 'neural', 'cnns', 'recognition', 'memory', 'networks']	['A failure to learn object shape geometry: Implications for convolutional neural networks as plausible models of biological vision. Here we examine the plausibility of deep convolutional neural networks (CNNs) as a theoretical framework for understanding biological vision in the context of image classification. Recent work on object recognition in human vision has shown that both global, and loc…	visual - object - objects - category - scene - image - images - vision - similarity - categorization - representations - shape - categories - stimuli - scenes - neural - cnns - recognition - memory - networks	1	FALSE	Article	Real-world scenes; Category learning; Category bias; Selective attention	2024	1	PSYCHONOMIC BULLETIN & REVIEW
Estimation of the Development of Depression and PTSD in Children Exposed to Sexual Abuse and Development of Decision Support Systems by Using Artificial Intelligence	19	19_ptsd_trauma_stress disorder_posttraumatic	Topic15-PTSD Detection	['ptsd', 'trauma', 'stress disorder', 'posttraumatic', 'stress', 'posttraumatic stress', 'traumatic', 'symptoms', 'posttraumatic stress disorder', 'childhood', 'stress disorder ptsd', 'disorder ptsd', 'abuse', 'maltreatment', 'traumatic stress', 'exposure', 'post traumatic', 'disorder', 'veterans', 'post traumatic stress']	['Hippocampal Resting-State Functional Connectivity Forecasts Individual Posttraumatic Stress Disorder Symptoms: A Data-Driven Approach. BACKGROUND: Posttraumatic stress disorder (PTSD) is a debilitating disorder, and there is no current accurate prediction of who develops it after trauma. Neurobiologically, individuals with chronic PTSD exhibit aberrant resting-state functional connectivity (rsF…	ptsd - trauma - stress disorder - posttraumatic - stress - posttraumatic stress - traumatic - symptoms - posttraumatic stress disorder - childhood - stress disorder ptsd - disorder ptsd - abuse - maltreatment - traumatic stress - exposure - post traumatic - disorder - veterans - post traumatic stress	1	FALSE	Article	Childhood sexual abuse; machine learning; artificial neural networks; depression; post-traumatic stress disorder	2022	14	JOURNAL OF CHILD SEXUAL ABUSE
Emotions as Proximal Causes of Word of Mouth: A Nonlinear Approach	3	3_personality_media_sentiment_social	Topic3-ML-based Personality Assessment	['personality', 'media', 'sentiment', 'social', 'social media', 'text', 'language', 'twitter', 'big', 'online', 'users', 'sentiment analysis', 'traits', 'natural language', 'news', 'content', 'public', 'analysis', 'data', 'psychological']	["Exploring a Language-Based Interest Assessment: Predicting Vocational Interests on Social Media Using Natural Language Processing. For more than a century, self-report inventories have been the traditional method for assessing vocational interests. Little research has examined the use of machine learning techniques, such as natural language processing (NLP), in interest assessment. This paper e…	personality - media - sentiment - social - social media - text - language - twitter - big - online - users - sentiment analysis - traits - natural language - news - content - public - analysis - data - psychological	0.0607985	FALSE	Article	word of mouth; emotions; emotional contagion; nonlinear methods	2018	7	NONLINEAR DYNAMICS PSYCHOLOGY AND LIFE SCIENCES
Lateral specialization in unilateral spatial neglect: a cognitive robotics model	0	0_language_cognitive_word_computational	Topic1-Human Cognitive Science	['language', 'cognitive', 'word', 'computational', 'neural', 'human', 'representations', 'models', 'cognition', 'knowledge', 'model', 'semantic', 'artificial', 'learning', 'words', 'information', 'cognitive science', 'reasoning', 'representation', 'intelligence']	['Artificial intelligence, human cognition, and conscious supremacy. The computational significance of consciousness is an important and potentially more tractable research theme than the hard problem of consciousness, as one could look at the correlation of consciousness and computational capacities through, e.g., algorithmic or complexity analyses. In the literature, consciousness is defined as…	language - cognitive - word - computational - neural - human - representations - models - cognition - knowledge - model - semantic - artificial - learning - words - information - cognitive science - reasoning - representation - intelligence	0.421706	FALSE	Article	Unilateral spatial neglect; Embodied cognition; Cognitive robotics; Hemisphere specialization; Neuropsychology	2016	14	COGNITIVE PROCESSING
Multimodal digital assessment of depression with actigraphy and app in Hong Kong Chinese	21	21_sleep_depression_stress_mood	Topic20-Digital Mental Health Monitoring	['sleep', 'depression', 'stress', 'mood', 'digital phenotyping', 'speech', 'features', 'smartphone', 'phenotyping', 'wearable', 'digital', 'data', 'symptoms', 'depressive', 'passive', 'activity', 'vocal', 'physiological', 'typing', 'using']	['Momentary Depression Severity Prediction in Patients With Acute Depression Who Undergo Sleep Deprivation Therapy: Speech-Based Machine Learning Approach. Background: Mobile devices for remote monitoring are inevitable tools to support treatment and patient care, especially in recurrent diseases such as major depressive disorder. The aim of this study was to learn if machine learning (ML) models…	sleep - depression - stress - mood - digital phenotyping - speech - features - smartphone - phenotyping - wearable - digital - data - symptoms - depressive - passive - activity - vocal - physiological - typing - using	1	FALSE	Article		2024	1	TRANSLATIONAL PSYCHIATRY
Artificial intelligence/machine learning for epilepsy and seizure diagnosis	23	23_epilepsy_seizure_seizures_eeg	Topic22-Epilepsy Detection	['epilepsy', 'seizure', 'seizures', 'eeg', 'patients', 'epileptic', 'diagnosis', 'detection', 'brain', 'temporal', 'gyrus', 'classification', 'temporal lobe', 'lobe', 'neurological', 'features', 'functional', 'method', 'clinical', 'fnirs']	['Altered voxel-mirrored homotopic connectivity in right temporal lobe epilepsy as measured using resting-state fMRI and support vector machine analyses. BackgroundPrior reports revealed abnormalities in voxel-mirrored homotopic connectivity (VMHC) when analyzing neuroimaging data from patients with various psychiatric conditions, including temporal lobe epilepsy (TLE). Whether these VHMC changes…	epilepsy - seizure - seizures - eeg - patients - epileptic - diagnosis - detection - brain - temporal - gyrus - classification - temporal lobe - lobe - neurological - features - functional - method - clinical - fnirs	1	FALSE	Article	Artificial intelligence; Machine learning; Epilepsy diagnosis; Seizure detection; Epilepsy imaging; EEG	2024	4	EPILEPSY & BEHAVIOR
Automated Item Generation with Recurrent Neural Networks	2	2_students_teaching_education_teachers	Topic4-AI in Educational Psychology	['students', 'teaching', 'education', 'teachers', 'learning', 'educational', 'student', 'academic', 'ai', 'writing', 'college', 'learners', 'literacy', 'deep', 'deep learning', 'college students', 'classroom', 'motivation', 'teacher', 'english']	["Relationship between teacher's ability model and students' behavior based on emotion-behavior relevance theory and artificial intelligence technology under the background of curriculum ideological and political education. Purpose: This paper aims to fully understand the relationship between students' classroom emotions and teachers' behaviors in the teaching environment, provide personalized te…	students - teaching - education - teachers - learning - educational - student - academic - ai - writing - college - learners - literacy - deep - deep learning - college students - classroom - motivation - teacher - english	0.113151	FALSE	Article	deep learning; neural networks; automatic item generation; machine learning	2018	31	PSYCHOMETRIKA
Multi-layer architecture for adaptive fuzzy inference system with a large number of input features	-1	-1_ocd_gut_gambling_delirium	NOISE	['ocd', 'gut', 'gambling', 'delirium', 'microbiota', 'obsessive', 'obsessive compulsive', 'compulsive', 'gut microbiota', 'patients', 'obsessive compulsive disorder', 'compulsive disorder', 'microbiome', 'igd', 'speech', 'violent', 'risk', 'machine learning', 'machine', 'using']	['Data-driven identification of subtypes of executive function across typical development, attention deficit hyperactivity disorder, and autism spectrum disorders. Background Impairment of executive function (EF), the goal-directed regulation of thoughts, actions, and emotions, drives negative outcomes and is common across neurodevelopmental disorders including attention deficit hyperactivity dis…	ocd - gut - gambling - delirium - microbiota - obsessive - obsessive compulsive - compulsive - gut microbiota - patients - obsessive compulsive disorder - compulsive disorder - microbiome - igd - speech - violent - risk - machine learning - machine - using	0.840248	FALSE	Article	Adaptive fuzzy neural network; 365-day concrete; Takagi-sugeno; Multi-layer ANFIS; Limitation	2017	10	COGNITIVE SYSTEMS RESEARCH
How producer biases can favor the evolution of communication: An analysis of evolutionary dynamics	0	0_language_cognitive_word_computational	Topic1-Human Cognitive Science	['language', 'cognitive', 'word', 'computational', 'neural', 'human', 'representations', 'models', 'cognition', 'knowledge', 'model', 'semantic', 'artificial', 'learning', 'words', 'information', 'cognitive science', 'reasoning', 'representation', 'intelligence']	['Artificial intelligence, human cognition, and conscious supremacy. The computational significance of consciousness is an important and potentially more tractable research theme than the hard problem of consciousness, as one could look at the correlation of consciousness and computational capacities through, e.g., algorithmic or complexity analyses. In the literature, consciousness is defined as…	language - cognitive - word - computational - neural - human - representations - models - cognition - knowledge - model - semantic - artificial - learning - words - information - cognitive science - reasoning - representation - intelligence	1	FALSE	Article	evolution of communication; producer bias; receiver bias; evolutionary dynamics	2008	11	ADAPTIVE BEHAVIOR
An Innovative Approach to Assessing Depth of Knowledge of Academic Words	2	2_students_teaching_education_teachers	Topic4-AI in Educational Psychology	['students', 'teaching', 'education', 'teachers', 'learning', 'educational', 'student', 'academic', 'ai', 'writing', 'college', 'learners', 'literacy', 'deep', 'deep learning', 'college students', 'classroom', 'motivation', 'teacher', 'english']	["Relationship between teacher's ability model and students' behavior based on emotion-behavior relevance theory and artificial intelligence technology under the background of curriculum ideological and political education. Purpose: This paper aims to fully understand the relationship between students' classroom emotions and teachers' behaviors in the teaching environment, provide personalized te…	students - teaching - education - teachers - learning - educational - student - academic - ai - writing - college - learners - literacy - deep - deep learning - college students - classroom - motivation - teacher - english	0.090015	FALSE	Article		2019	15	LANGUAGE ASSESSMENT QUARTERLY
Representation Recovers Information	0	0_language_cognitive_word_computational	Topic1-Human Cognitive Science	['language', 'cognitive', 'word', 'computational', 'neural', 'human', 'representations', 'models', 'cognition', 'knowledge', 'model', 'semantic', 'artificial', 'learning', 'words', 'information', 'cognitive science', 'reasoning', 'representation', 'intelligence']	['Artificial intelligence, human cognition, and conscious supremacy. The computational significance of consciousness is an important and potentially more tractable research theme than the hard problem of consciousness, as one could look at the correlation of consciousness and computational capacities through, e.g., algorithmic or complexity analyses. In the literature, consciousness is defined as…	language - cognitive - word - computational - neural - human - representations - models - cognition - knowledge - model - semantic - artificial - learning - words - information - cognitive science - reasoning - representation - intelligence	0.385449	FALSE	Article	Representation; Information; Sensory embedding; Close coupling; Cognitive informatics	2009	1	COGNITIVE SCIENCE
Emotion Recognition Algorithm Application Financial Development and Economic Growth Status and Development Trend	3	3_personality_media_sentiment_social	Topic3-ML-based Personality Assessment	['personality', 'media', 'sentiment', 'social', 'social media', 'text', 'language', 'twitter', 'big', 'online', 'users', 'sentiment analysis', 'traits', 'natural language', 'news', 'content', 'public', 'analysis', 'data', 'psychological']	["Exploring a Language-Based Interest Assessment: Predicting Vocational Interests on Social Media Using Natural Language Processing. For more than a century, self-report inventories have been the traditional method for assessing vocational interests. Little research has examined the use of machine learning techniques, such as natural language processing (NLP), in interest assessment. This paper e…	personality - media - sentiment - social - social media - text - language - twitter - big - online - users - sentiment analysis - traits - natural language - news - content - public - analysis - data - psychological	0.0577629	FALSE	Article	emotion recognition algorithm; financial development; economic growth; development forecast; application	2022	4	FRONTIERS IN PSYCHOLOGY
Artificial Intelligence Network Embedding, Entrepreneurial Intention, and Behavior Analysis for College Students' Rural Tourism Entrepreneurship	2	2_students_teaching_education_teachers	Topic4-AI in Educational Psychology	['students', 'teaching', 'education', 'teachers', 'learning', 'educational', 'student', 'academic', 'ai', 'writing', 'college', 'learners', 'literacy', 'deep', 'deep learning', 'college students', 'classroom', 'motivation', 'teacher', 'english']	["Relationship between teacher's ability model and students' behavior based on emotion-behavior relevance theory and artificial intelligence technology under the background of curriculum ideological and political education. Purpose: This paper aims to fully understand the relationship between students' classroom emotions and teachers' behaviors in the teaching environment, provide personalized te…	students - teaching - education - teachers - learning - educational - student - academic - ai - writing - college - learners - literacy - deep - deep learning - college students - classroom - motivation - teacher - english	0.0710622	FALSE	Article	entrepreneurial intention; artificial intelligence network; entrepreneurial willingness; rural tourism; college students' entrepreneurial mental resilience	2022	0	FRONTIERS IN PSYCHOLOGY
From biomechanics to sport psychology: the current oscillatory approach	20	20_sports_players_athletes_sport	Topic24-AI in Sports Psychology	['sports', 'players', 'athletes', 'sport', 'physical', 'lifting', 'soccer', 'football', 'postures', 'gait', 'education', 'performance', 'training', 'coaches', 'basketball', 'player', 'muscle', 'action', 'body', 'posture']	["Recognizing upper limb movements with wrist worn inertial sensors using k-means clustering classification. In this paper we present a methodology for recognizing three fundamental movements of the human forearm (extension, flexion and rotation) using pattern recognition applied to the data from a single wrist-worn, inertial sensor. We propose that this technique could be used as a clinical tool…	sports - players - athletes - sport - physical - lifting - soccer - football - postures - gait - education - performance - training - coaches - basketball - player - muscle - action - body - posture	1	FALSE	Article	movement; oscillation; sports; dynamics; tensegrity; strategies; sensorimotor control	2015	9	FRONTIERS IN PSYCHOLOGY
Support vector machine for classification of walking conditions of persons after stroke with dropped foot	20	20_sports_players_athletes_sport	Topic24-AI in Sports Psychology	['sports', 'players', 'athletes', 'sport', 'physical', 'lifting', 'soccer', 'football', 'postures', 'gait', 'education', 'performance', 'training', 'coaches', 'basketball', 'player', 'muscle', 'action', 'body', 'posture']	["Recognizing upper limb movements with wrist worn inertial sensors using k-means clustering classification. In this paper we present a methodology for recognizing three fundamental movements of the human forearm (extension, flexion and rotation) using pattern recognition applied to the data from a single wrist-worn, inertial sensor. We propose that this technique could be used as a clinical tool…	sports - players - athletes - sport - physical - lifting - soccer - football - postures - gait - education - performance - training - coaches - basketball - player - muscle - action - body - posture	1	FALSE	Article	Locomotion; Gait analysis; Stroke	2009	79	HUMAN MOVEMENT SCIENCE
The bold decision to go all in: Understanding the reasons behind consumers' willingness to migrate to the metaverse	13	13_consumers_service_consumer_customer	Topic17-Intelligent Assistant and User Experience	['consumers', 'service', 'consumer', 'customer', 'intention', 'perceived', 'ai', 'chatbots', 'customers', 'chatbot', 'robots', 'purchase', 'brand', 'marketing', 'metaverse', 'technology', 'adoption', 'virtual', 'assistants', 'trust']	["Exploring users' adoption intentions of intelligent virtual assistants in financial services: An anthropomorphic perspectives and socio-psychological perspectives. With artificial intelligence entering all spheres of technology, it has also prompted financial businesses to enter into Intelligent Financial Technologies (FinTech). Chatbots and virtual assistants all are examples of how AI is used…	consumers - service - consumer - customer - intention - perceived - ai - chatbots - customers - chatbot - robots - purchase - brand - marketing - metaverse - technology - adoption - virtual - assistants - trust	0.588546	FALSE	Article	anxiety; behavioral reasoning theory; cognitive dissonance; intergroup threat theory; metaverse; willingness to migrate	2024	12	PSYCHOLOGY & MARKETING
Modeling language and cognition with deep unsupervised learning: a tutorial overview	0	0_language_cognitive_word_computational	Topic1-Human Cognitive Science	['language', 'cognitive', 'word', 'computational', 'neural', 'human', 'representations', 'models', 'cognition', 'knowledge', 'model', 'semantic', 'artificial', 'learning', 'words', 'information', 'cognitive science', 'reasoning', 'representation', 'intelligence']	['Artificial intelligence, human cognition, and conscious supremacy. The computational significance of consciousness is an important and potentially more tractable research theme than the hard problem of consciousness, as one could look at the correlation of consciousness and computational capacities through, e.g., algorithmic or complexity analyses. In the literature, consciousness is defined as…	language - cognitive - word - computational - neural - human - representations - models - cognition - knowledge - model - semantic - artificial - learning - words - information - cognitive science - reasoning - representation - intelligence	0.279998	FALSE	Article	neural networks; connectionist modeling; deep learning; hierarchical generative models; unsupervised learning; visual word recognition	2013	47	FRONTIERS IN PSYCHOLOGY
A New Wavelet Collocation Algorithm for Solving a Nonlinear Boundary Value Problem of the Human Corneal Shape	23	23_epilepsy_seizure_seizures_eeg	Topic22-Epilepsy Detection	['epilepsy', 'seizure', 'seizures', 'eeg', 'patients', 'epileptic', 'diagnosis', 'detection', 'brain', 'temporal', 'gyrus', 'classification', 'temporal lobe', 'lobe', 'neurological', 'features', 'functional', 'method', 'clinical', 'fnirs']	['Altered voxel-mirrored homotopic connectivity in right temporal lobe epilepsy as measured using resting-state fMRI and support vector machine analyses. BackgroundPrior reports revealed abnormalities in voxel-mirrored homotopic connectivity (VMHC) when analyzing neuroimaging data from patients with various psychiatric conditions, including temporal lobe epilepsy (TLE). Whether these VHMC changes…	epilepsy - seizure - seizures - eeg - patients - epileptic - diagnosis - detection - brain - temporal - gyrus - classification - temporal lobe - lobe - neurological - features - functional - method - clinical - fnirs	0.24445	FALSE	Article	human corneal shape; intraocular pressure; nonlinear boundary value problem; Hermite wavelets; operational matrix of derivative	2023	3	NONLINEAR DYNAMICS PSYCHOLOGY AND LIFE SCIENCES
Functional Near-Infrared Spectroscopy-Based Computer-Aided Diagnosis of Major Depressive Disorder Using Convolutional Neural Network with a New Channel Embedding Layer Considering Inter-Hemispheric Asymmetry in Prefrontal Hemodynamic Responses	23	23_epilepsy_seizure_seizures_eeg	Topic22-Epilepsy Detection	['epilepsy', 'seizure', 'seizures', 'eeg', 'patients', 'epileptic', 'diagnosis', 'detection', 'brain', 'temporal', 'gyrus', 'classification', 'temporal lobe', 'lobe', 'neurological', 'features', 'functional', 'method', 'clinical', 'fnirs']	['Altered voxel-mirrored homotopic connectivity in right temporal lobe epilepsy as measured using resting-state fMRI and support vector machine analyses. BackgroundPrior reports revealed abnormalities in voxel-mirrored homotopic connectivity (VMHC) when analyzing neuroimaging data from patients with various psychiatric conditions, including temporal lobe epilepsy (TLE). Whether these VHMC changes…	epilepsy - seizure - seizures - eeg - patients - epileptic - diagnosis - detection - brain - temporal - gyrus - classification - temporal lobe - lobe - neurological - features - functional - method - clinical - fnirs	0.098471	FALSE	Article		2024	1	DEPRESSION AND ANXIETY
Bridging the Gap Between Self-Report and Behavioral Laboratory Measures: A Real-Time Driving Task With Inverse Reinforcement Learning	9	9_alcohol_substance_eating_use	Topic14-Substance Abuse Prediction	['alcohol', 'substance', 'eating', 'use', 'substance use', 'drinking', 'cannabis', 'alcohol use', 'use disorder', 'aud', 'binge', 'opioid', 'dependence', 'treatment', 'smoking', 'overdose', 'consumption', 'addiction', 'drug', 'binge eating']	['The prediction of resilience to alcohol consumption in youths: insular and subcallosal cingulate myeloarchitecture. Background The prediction of alcohol consumption in youths and particularly biomarkers of resilience, is critical for early intervention to reduce the risk of subsequent harmful alcohol use. Methods At baseline, the longitudinal relaxation rate (R1), indexing grey matter myelinati…	alcohol - substance - eating - use - substance use - drinking - cannabis - alcohol use - use disorder - aud - binge - opioid - dependence - treatment - smoking - overdose - consumption - addiction - drug - binge eating	0.466073	FALSE	Article	impulsivity; realistic experiment; inverse reinforcement learning; deep learning; driving; open data; open materials	2024	0	PSYCHOLOGICAL SCIENCE
The Dynamics of Neural Populations Capture the Laws of the Mind	0	0_language_cognitive_word_computational	Topic1-Human Cognitive Science	['language', 'cognitive', 'word', 'computational', 'neural', 'human', 'representations', 'models', 'cognition', 'knowledge', 'model', 'semantic', 'artificial', 'learning', 'words', 'information', 'cognitive science', 'reasoning', 'representation', 'intelligence']	['Artificial intelligence, human cognition, and conscious supremacy. The computational significance of consciousness is an important and potentially more tractable research theme than the hard problem of consciousness, as one could look at the correlation of consciousness and computational capacities through, e.g., algorithmic or complexity analyses. In the literature, consciousness is defined as…	language - cognitive - word - computational - neural - human - representations - models - cognition - knowledge - model - semantic - artificial - learning - words - information - cognitive science - reasoning - representation - intelligence	0.556454	FALSE	Article	Dynamical systems; Neural dynamics; Neural populations; Embodied cognition; Cognitive architectures; Foundations of cognitive science; Sequence generation	2020	16	TOPICS IN COGNITIVE SCIENCE
Finger enslaving in the dominant and non-dominant hand	20	20_sports_players_athletes_sport	Topic24-AI in Sports Psychology	['sports', 'players', 'athletes', 'sport', 'physical', 'lifting', 'soccer', 'football', 'postures', 'gait', 'education', 'performance', 'training', 'coaches', 'basketball', 'player', 'muscle', 'action', 'body', 'posture']	["Recognizing upper limb movements with wrist worn inertial sensors using k-means clustering classification. In this paper we present a methodology for recognizing three fundamental movements of the human forearm (extension, flexion and rotation) using pattern recognition applied to the data from a single wrist-worn, inertial sensor. We propose that this technique could be used as a clinical tool…	sports - players - athletes - sport - physical - lifting - soccer - football - postures - gait - education - performance - training - coaches - basketball - player - muscle - action - body - posture	1	FALSE	Article	Laterality; Isometric force production; Finger interaction; Neural network	2014	18	HUMAN MOVEMENT SCIENCE
Professional Development and Psychological Adjustment of Physical Education Teachers	20	20_sports_players_athletes_sport	Topic24-AI in Sports Psychology	['sports', 'players', 'athletes', 'sport', 'physical', 'lifting', 'soccer', 'football', 'postures', 'gait', 'education', 'performance', 'training', 'coaches', 'basketball', 'player', 'muscle', 'action', 'body', 'posture']	["Recognizing upper limb movements with wrist worn inertial sensors using k-means clustering classification. In this paper we present a methodology for recognizing three fundamental movements of the human forearm (extension, flexion and rotation) using pattern recognition applied to the data from a single wrist-worn, inertial sensor. We propose that this technique could be used as a clinical tool…	sports - players - athletes - sport - physical - lifting - soccer - football - postures - gait - education - performance - training - coaches - basketball - player - muscle - action - body - posture	1	FALSE	Article	physical education (PE) teachers; professional development; psychological adjustment ability (PAA); technique for order of preference by similarity to ideal solution (TOPSIS)	2021	0	REVISTA DE PSICOLOGIA DEL DEPORTE
Deep learning applied to electroencephalogram data in mental disorders: A systematic review	23	23_epilepsy_seizure_seizures_eeg	Topic22-Epilepsy Detection	['epilepsy', 'seizure', 'seizures', 'eeg', 'patients', 'epileptic', 'diagnosis', 'detection', 'brain', 'temporal', 'gyrus', 'classification', 'temporal lobe', 'lobe', 'neurological', 'features', 'functional', 'method', 'clinical', 'fnirs']	['Altered voxel-mirrored homotopic connectivity in right temporal lobe epilepsy as measured using resting-state fMRI and support vector machine analyses. BackgroundPrior reports revealed abnormalities in voxel-mirrored homotopic connectivity (VMHC) when analyzing neuroimaging data from patients with various psychiatric conditions, including temporal lobe epilepsy (TLE). Whether these VHMC changes…	epilepsy - seizure - seizures - eeg - patients - epileptic - diagnosis - detection - brain - temporal - gyrus - classification - temporal lobe - lobe - neurological - features - functional - method - clinical - fnirs	0.0804591	FALSE	Review	Electroencephalogram; Deep learning; CNN; LSTM; Mental disorders	2021	29	BIOLOGICAL PSYCHOLOGY
Home Textile Pattern Emotion Labeling Using Deep Multi-View Feature Learning	22	22_creativity_creative_art_aesthetic	Topic26-AI in Creativity Research	['creativity', 'creative', 'art', 'aesthetic', 'artworks', 'ai', 'human', 'human creativity', 'artwork', 'divergent', 'artistic', 'image', 'originality', 'thinking', 'semantic distance', 'painting', 'artists', 'paintings', 'creative process', 'literary']	["Art therapy to control nail biting using a cognitive behavioral approach through new innovative game and animation. BackgroundNail biting is categorized as a habitual behavior, commonly observed in children and occasionally in adults. This disorder occurs unconsciously, with individuals often unaware of their behavior. Since there are physical and psychological complications and quality of life…	creativity - creative - art - aesthetic - artworks - ai - human - human creativity - artwork - divergent - artistic - image - originality - thinking - semantic distance - painting - artists - paintings - creative process - literary	0.319648	FALSE	Article	home textile pattern; emotion labeling; deep learning; multi-view learning; feature selection	2021	0	FRONTIERS IN PSYCHOLOGY
Predicting life engagement and happiness from gaming motives and primary emotional traits before and during the COVID pandemic: a machine learning approach	1	1_depression_treatment_health_covid	Topic2-AI Assisted Depression Treatment	['depression', 'treatment', 'health', 'covid', 'anxiety', 'covid 19', '19', 'pandemic', 'mental', 'depressive', 'antidepressant', 'symptoms', 'predictors', 'machine learning', 'mental health', 'clinical', 'machine', 'psychiatric', 'patients', 'prediction']	['Mental health after the COVID-19 pandemic among Finnish youth: a repeated, cross-sectional, population-based study. Background High levels of mental health problems among young people were reported during the COVID-19 pandemic, but studies of the post-pandemic period are scarce. We assessed mental health problems among Finnish youth before, during, and after the COVID-19 pandemic using nationwi…	depression - treatment - health - covid - anxiety - covid 19 - 19 - pandemic - mental - depressive - antidepressant - symptoms - predictors - machine learning - mental health - clinical - machine - psychiatric - patients - prediction	0.0524668	FALSE	Article	Gaming motives; Primary emotional systems; Happiness; Life engagement; Machine learning; Personality	2024	0	DISCOVER PSYCHOLOGY
Artificial cognition: How experimental psychology can help generate explainable artificial intelligence	11	11_trust_ai_human_moral	Topic5-Trust in AI	['trust', 'ai', 'human', 'moral', 'agents', 'intelligence', 'artificial intelligence', 'artificial', 'humans', 'decision', 'team', 'robots', 'systems', 'teams', 'agent', 'people', 'xai', 'human ai', 'artificial intelligence ai', 'intelligence ai']	["When combinations of humans and AI are useful: A systematic review and meta-analysis. Inspired by the increasing use of artificial intelligence (AI) to augment humans, researchers have studied human-AI systems involving different tasks, systems and populations. Despite such a large body of work, we lack a broad conceptual understanding of when combinations of humans and AI are better than eithe…	trust - ai - human - moral - agents - intelligence - artificial intelligence - artificial - humans - decision - team - robots - systems - teams - agent - people - xai - human ai - artificial intelligence ai - intelligence ai	0.0608466	FALSE	Review	Hypothesis testing; Comparative cognition	2021	50	PSYCHONOMIC BULLETIN & REVIEW
An End-to-End Depression Recognition Method Based on EEGNet	12	12_mdd_functional_brain_bd	Topic6-AI Assisted Neuroimaging Analysis	['mdd', 'functional', 'brain', 'bd', 'connectivity', 'patients', 'disorder', 'depressive', 'depression', 'depressive disorder', 'major depressive disorder', 'major depressive', 'resting', 'resting state', 'gyrus', 'functional connectivity', 'bipolar', 'treatment', 'imaging', 'healthy']	['Morinda officinalis oligosaccharides modulate the default-mode network homogeneity in major depressive disorder at rest. Background: While prior studies have explored the efficacy of Morinda officinalis oligosaccharides (MOs) as a treatment for patients with major depressive disorder (MDD), the mechanistic basis for the effects of MOs on brain function or the default-mode network (DMN) has yet …	mdd - functional - brain - bd - connectivity - patients - disorder - depressive - depression - depressive disorder - major depressive disorder - major depressive - resting - resting state - gyrus - functional connectivity - bipolar - treatment - imaging - healthy	0.0653676	FALSE	Article	depression recognition; electroencephalogram (EEG); convolutional neural network (CNN); end-to-end; EEGNet	2022	11	FRONTIERS IN PSYCHIATRY
Consistent brain structural abnormalities and multisite individualised classification of schizophrenia using deep neural networks	5	5_schizophrenia_psychosis_patients_controls	Topic8-Schizophrenia Detection	['schizophrenia', 'psychosis', 'patients', 'controls', 'functional', 'patients schizophrenia', 'episode', 'clinical', 'healthy', 'chr', 'schizophrenia patients', 'scz', 'sz', 'antipsychotic', 'healthy controls', 'connectivity', 'fep', 'brain', 'psychotic', 'classification']	['Metacognitive Training Modulates Default-Mode Network Homogeneity During 8-Week Olanzapine Treatment in Patients With Schizophrenia. Background Previous studies have revealed the efficacy of metacognitive training for schizophrenia. However, the underlying mechanisms of metacognitive training on brain function alterations, including the default-mode network (DMN), remain unknown. The present st…	schizophrenia - psychosis - patients - controls - functional - patients schizophrenia - episode - clinical - healthy - chr - schizophrenia patients - scz - sz - antipsychotic - healthy controls - connectivity - fep - brain - psychotic - classification	0.174938	FALSE	Article	Deep learning; grey matter; meta-analysis; multisite study; schizophrenia	2022	17	BRITISH JOURNAL OF PSYCHIATRY
Would you be willing to purchase virtual gifts during esports live streams? Streamer characteristics and cultural traits	13	13_consumers_service_consumer_customer	Topic17-Intelligent Assistant and User Experience	['consumers', 'service', 'consumer', 'customer', 'intention', 'perceived', 'ai', 'chatbots', 'customers', 'chatbot', 'robots', 'purchase', 'brand', 'marketing', 'metaverse', 'technology', 'adoption', 'virtual', 'assistants', 'trust']	["Exploring users' adoption intentions of intelligent virtual assistants in financial services: An anthropomorphic perspectives and socio-psychological perspectives. With artificial intelligence entering all spheres of technology, it has also prompted financial businesses to enter into Intelligent Financial Technologies (FinTech). Chatbots and virtual assistants all are examples of how AI is used…	consumers - service - consumer - customer - intention - perceived - ai - chatbots - customers - chatbot - robots - purchase - brand - marketing - metaverse - technology - adoption - virtual - assistants - trust	0.305542	FALSE	Article	Virtual gifts; Esports live streaming; Streamer characteristics; Cultural traits; Driving mechanisms; The Howard-Sheth model	2024	16	COMPUTERS IN HUMAN BEHAVIOR
Prediction of Suicidal Ideation among Korean Adults Using Machine Learning: A Cross-Sectional Study	4	4_suicide_suicidal_risk_suicide risk	Topic7-Suicide Prediction	['suicide', 'suicidal', 'risk', 'suicide risk', 'ideation', 'suicidal ideation', 'suicide attempts', 'attempts', 'suicide attempt', 'attempt', 'posts', 'health', 'si', 'suicidality', 'prevention', 'suicide prevention', 'self harm', 'death', 'risk suicide', 'suicidal behavior']	["Prediction of Sex-Specific Suicide Risk Using Machine Learning and Single-Payer Health Care Registry Data From Denmark. IMPORTANCE Suicide is a public health problem, with multiple causes that are poorly understood. The increased focus on combining health care data with machine-learning approaches in psychiatry may help advance the understanding of suicide risk. OBJECTIVE To examine sex-specifi…	suicide - suicidal - risk - suicide risk - ideation - suicidal ideation - suicide attempts - attempts - suicide attempt - attempt - posts - health - si - suicidality - prevention - suicide prevention - self harm - death - risk suicide - suicidal behavior	1	FALSE	Article	Suicidal ideation; Risk factor; Machine learning; Artificial intelligence	2020	11	PSYCHIATRY INVESTIGATION
Does SMS advertising still have relevance to increase consumer purchase intention? A hybrid PLS-SEM-neural network modelling approach	13	13_consumers_service_consumer_customer	Topic17-Intelligent Assistant and User Experience	['consumers', 'service', 'consumer', 'customer', 'intention', 'perceived', 'ai', 'chatbots', 'customers', 'chatbot', 'robots', 'purchase', 'brand', 'marketing', 'metaverse', 'technology', 'adoption', 'virtual', 'assistants', 'trust']	["Exploring users' adoption intentions of intelligent virtual assistants in financial services: An anthropomorphic perspectives and socio-psychological perspectives. With artificial intelligence entering all spheres of technology, it has also prompted financial businesses to enter into Intelligent Financial Technologies (FinTech). Chatbots and virtual assistants all are examples of how AI is used…	consumers - service - consumer - customer - intention - perceived - ai - chatbots - customers - chatbot - robots - purchase - brand - marketing - metaverse - technology - adoption - virtual - assistants - trust	0.0722545	FALSE	Article	Advertising value; Artificial neural network; Attitude toward SMS advertising; Brand familiarity; SMS advertising perception; PLS-SEM; Purchase intention	2021	139	COMPUTERS IN HUMAN BEHAVIOR
Refuting the unfolding-argument on the irrelevance of causal structure to consciousness	0	0_language_cognitive_word_computational	Topic1-Human Cognitive Science	['language', 'cognitive', 'word', 'computational', 'neural', 'human', 'representations', 'models', 'cognition', 'knowledge', 'model', 'semantic', 'artificial', 'learning', 'words', 'information', 'cognitive science', 'reasoning', 'representation', 'intelligence']	['Artificial intelligence, human cognition, and conscious supremacy. The computational significance of consciousness is an important and potentially more tractable research theme than the hard problem of consciousness, as one could look at the correlation of consciousness and computational capacities through, e.g., algorithmic or complexity analyses. In the literature, consciousness is defined as…	language - cognitive - word - computational - neural - human - representations - models - cognition - knowledge - model - semantic - artificial - learning - words - information - cognitive science - reasoning - representation - intelligence	0.377572	FALSE	Article	Neural dynamics; Neural-networks; Consciousness; Temporal perturbations; Recurrent-networks; Cognitive-control; Unfolding-argument; Universal approximation theorem	2021	2	CONSCIOUSNESS AND COGNITION
A deep learning latent variable model to identify children with autism through motor abnormalities	7	7_asd_autism_autism spectrum_autism spectrum disorder	Topic12-Autism Detection	['asd', 'autism', 'autism spectrum', 'autism spectrum disorder', 'spectrum disorder', 'spectrum', 'children', 'autistic', 'spectrum disorder asd', 'disorder asd', 'children asd', 'disorder', 'td', 'children autism', 'individuals asd', 'neurodevelopmental', 'social', 'typically developing', 'children autism spectrum', 'toddlers']	['Aberrant Functional Connectivity of Neural Circuits Associated with Social and Sensorimotor Deficits in Young Children with Autism Spectrum Disorder. Autism spectrum disorder (ASD) is a neurodevelopmental disorder characterized by atypical functional integration of brain regions. The vast majority of neuroimaging studies of ASD have focused on older children, adolescents, and adults with the di…	asd - autism - autism spectrum - autism spectrum disorder - spectrum disorder - spectrum - children - autistic - spectrum disorder asd - disorder asd - children asd - disorder - td - children autism - individuals asd - neurodevelopmental - social - typically developing - children autism spectrum - toddlers	1	FALSE	Article	machine learning; autism spectrum disorder; ASD; motor abnormalities; deep learning; early detection; diagnosis	2023	14	FRONTIERS IN PSYCHOLOGY
A systematic review of EEG based automated schizophrenia classification through machine learning and deep learning	5	5_schizophrenia_psychosis_patients_controls	Topic8-Schizophrenia Detection	['schizophrenia', 'psychosis', 'patients', 'controls', 'functional', 'patients schizophrenia', 'episode', 'clinical', 'healthy', 'chr', 'schizophrenia patients', 'scz', 'sz', 'antipsychotic', 'healthy controls', 'connectivity', 'fep', 'brain', 'psychotic', 'classification']	['Metacognitive Training Modulates Default-Mode Network Homogeneity During 8-Week Olanzapine Treatment in Patients With Schizophrenia. Background Previous studies have revealed the efficacy of metacognitive training for schizophrenia. However, the underlying mechanisms of metacognitive training on brain function alterations, including the default-mode network (DMN), remain unknown. The present st…	schizophrenia - psychosis - patients - controls - functional - patients schizophrenia - episode - clinical - healthy - chr - schizophrenia patients - scz - sz - antipsychotic - healthy controls - connectivity - fep - brain - psychotic - classification	0.0820665	FALSE	Article	EEG; Schizophrenia (SCZ); AI; machine learning; deep learning; classification	2024	7	FRONTIERS IN HUMAN NEUROSCIENCE
Machine learning algorithms revealed distorted retinal vascular branching in individuals with bipolar disorder	12	12_mdd_functional_brain_bd	Topic6-AI Assisted Neuroimaging Analysis	['mdd', 'functional', 'brain', 'bd', 'connectivity', 'patients', 'disorder', 'depressive', 'depression', 'depressive disorder', 'major depressive disorder', 'major depressive', 'resting', 'resting state', 'gyrus', 'functional connectivity', 'bipolar', 'treatment', 'imaging', 'healthy']	['Morinda officinalis oligosaccharides modulate the default-mode network homogeneity in major depressive disorder at rest. Background: While prior studies have explored the efficacy of Morinda officinalis oligosaccharides (MOs) as a treatment for patients with major depressive disorder (MDD), the mechanistic basis for the effects of MOs on brain function or the default-mode network (DMN) has yet …	mdd - functional - brain - bd - connectivity - patients - disorder - depressive - depression - depressive disorder - major depressive disorder - major depressive - resting - resting state - gyrus - functional connectivity - bipolar - treatment - imaging - healthy	0.266998	FALSE	Article	Bipolar disorder; Retina; Vascular plexus	2022	2	JOURNAL OF AFFECTIVE DISORDERS
Bayesian approximations to the theory of visual attention (TVA) in a foraging task	14	14_visual_object_objects_category	Topic11-Visual Processing Mechanism and Modeling	['visual', 'object', 'objects', 'category', 'scene', 'image', 'images', 'vision', 'similarity', 'categorization', 'representations', 'shape', 'categories', 'stimuli', 'scenes', 'neural', 'cnns', 'recognition', 'memory', 'networks']	['A failure to learn object shape geometry: Implications for convolutional neural networks as plausible models of biological vision. Here we examine the plausibility of deep convolutional neural networks (CNNs) as a theoretical framework for understanding biological vision in the context of image classification. Recent work on object recognition in human vision has shown that both global, and loc…	visual - object - objects - category - scene - image - images - vision - similarity - categorization - representations - shape - categories - stimuli - scenes - neural - cnns - recognition - memory - networks	1	FALSE	Article	Visual attention; foraging; TVA; Bayesian classifier; attentional switching	2023	4	QUARTERLY JOURNAL OF EXPERIMENTAL PSYCHOLOGY
Object affordance based multimodal fusion for natural Human-Robot interaction	0	0_language_cognitive_word_computational	Topic1-Human Cognitive Science	['language', 'cognitive', 'word', 'computational', 'neural', 'human', 'representations', 'models', 'cognition', 'knowledge', 'model', 'semantic', 'artificial', 'learning', 'words', 'information', 'cognitive science', 'reasoning', 'representation', 'intelligence']	['Artificial intelligence, human cognition, and conscious supremacy. The computational significance of consciousness is an important and potentially more tractable research theme than the hard problem of consciousness, as one could look at the correlation of consciousness and computational capacities through, e.g., algorithmic or complexity analyses. In the literature, consciousness is defined as…	language - cognitive - word - computational - neural - human - representations - models - cognition - knowledge - model - semantic - artificial - learning - words - information - cognitive science - reasoning - representation - intelligence	0.227247	FALSE	Article	Object affordance recognition; Multimodal fusion; Natural Human-Robot interaction	2019	23	COGNITIVE SYSTEMS RESEARCH
Common Object Representations for Visual Production and Recognition	14	14_visual_object_objects_category	Topic11-Visual Processing Mechanism and Modeling	['visual', 'object', 'objects', 'category', 'scene', 'image', 'images', 'vision', 'similarity', 'categorization', 'representations', 'shape', 'categories', 'stimuli', 'scenes', 'neural', 'cnns', 'recognition', 'memory', 'networks']	['A failure to learn object shape geometry: Implications for convolutional neural networks as plausible models of biological vision. Here we examine the plausibility of deep convolutional neural networks (CNNs) as a theoretical framework for understanding biological vision in the context of image classification. Recent work on object recognition in human vision has shown that both global, and loc…	visual - object - objects - category - scene - image - images - vision - similarity - categorization - representations - shape - categories - stimuli - scenes - neural - cnns - recognition - memory - networks	0.101255	FALSE	Article	Communication; Drawing; Learning; Perception and action; Computer vision	2018	42	COGNITIVE SCIENCE
Studying Well and Performing Well: A Bayesian Analysis on Team and Individual Rowing Performance in Dual Career Athletes	20	20_sports_players_athletes_sport	Topic24-AI in Sports Psychology	['sports', 'players', 'athletes', 'sport', 'physical', 'lifting', 'soccer', 'football', 'postures', 'gait', 'education', 'performance', 'training', 'coaches', 'basketball', 'player', 'muscle', 'action', 'body', 'posture']	["Recognizing upper limb movements with wrist worn inertial sensors using k-means clustering classification. In this paper we present a methodology for recognizing three fundamental movements of the human forearm (extension, flexion and rotation) using pattern recognition applied to the data from a single wrist-worn, inertial sensor. We propose that this technique could be used as a clinical tool…	sports - players - athletes - sport - physical - lifting - soccer - football - postures - gait - education - performance - training - coaches - basketball - player - muscle - action - body - posture	1	FALSE	Article	dual career; social loafing; rowing; team crew; Bayesian analysis	2020	6	FRONTIERS IN PSYCHOLOGY
A Comparative Study on Entrepreneurial Attitudes Modeled with Logistic Regression and Bayes Nets	16	16_employees_job_employee_ai	Topic18-AI in Organizational Management	['employees', 'job', 'employee', 'ai', 'organizational', 'management', 'organizations', 'hrm', 'leadership', 'career', 'work', 'workplace', 'human resource', 'artificial intelligence', 'intelligence', 'hr', 'artificial', 'technology', 'innovation', 'coaching']	["Job attitudes and career behaviors relating to employees' perceived incorporation of artificial intelligence in the workplace: a career self-management perspective. Purpose Artificial intelligence (AI) continues to be deployed in workplaces. While there are many positive outcomes of AI integration, understanding the extent of its consequences on employees is limited. Hence, this study examines …	employees - job - employee - ai - organizational - management - organizations - hrm - leadership - career - work - workplace - human resource - artificial intelligence - intelligence - hr - artificial - technology - innovation - coaching	0.0693597	FALSE	Article	entrepreneurship; logistic regression; Bayes nets	2012	5	SPANISH JOURNAL OF PSYCHOLOGY
Feature inference and the causal structure of categories	0	0_language_cognitive_word_computational	Topic1-Human Cognitive Science	['language', 'cognitive', 'word', 'computational', 'neural', 'human', 'representations', 'models', 'cognition', 'knowledge', 'model', 'semantic', 'artificial', 'learning', 'words', 'information', 'cognitive science', 'reasoning', 'representation', 'intelligence']	['Artificial intelligence, human cognition, and conscious supremacy. The computational significance of consciousness is an important and potentially more tractable research theme than the hard problem of consciousness, as one could look at the correlation of consciousness and computational capacities through, e.g., algorithmic or complexity analyses. In the literature, consciousness is defined as…	language - cognitive - word - computational - neural - human - representations - models - cognition - knowledge - model - semantic - artificial - learning - words - information - cognitive science - reasoning - representation - intelligence	0.0936701	FALSE	Article		2005	112	COGNITIVE PSYCHOLOGY
Machine learning-based discrimination of panic disorder from other anxiety disorders	12	12_mdd_functional_brain_bd	Topic6-AI Assisted Neuroimaging Analysis	['mdd', 'functional', 'brain', 'bd', 'connectivity', 'patients', 'disorder', 'depressive', 'depression', 'depressive disorder', 'major depressive disorder', 'major depressive', 'resting', 'resting state', 'gyrus', 'functional connectivity', 'bipolar', 'treatment', 'imaging', 'healthy']	['Morinda officinalis oligosaccharides modulate the default-mode network homogeneity in major depressive disorder at rest. Background: While prior studies have explored the efficacy of Morinda officinalis oligosaccharides (MOs) as a treatment for patients with major depressive disorder (MDD), the mechanistic basis for the effects of MOs on brain function or the default-mode network (DMN) has yet …	mdd - functional - brain - bd - connectivity - patients - disorder - depressive - depression - depressive disorder - major depressive disorder - major depressive - resting - resting state - gyrus - functional connectivity - bipolar - treatment - imaging - healthy	0.0561474	FALSE	Article	Machine learning; Artificial intelligence; Mental health; Panic disorder; Anxiety disorder	2021	18	JOURNAL OF AFFECTIVE DISORDERS
Heart Rate Information-Based Machine Learning Prediction of Emotions Among Pregnant Women	6	6_facial_music_emotion_faces	Topic9-Affective Computing	['facial', 'music', 'emotion', 'faces', 'emotions', 'recognition', 'expressions', 'face', 'emotion recognition', 'emotional', 'musical', 'facial expressions', 'audio', 'eeg', 'expression', 'features', 'facial expression', 'affective', 'signals', 'valence']	["Facial Expression Emotion Recognition Model Integrating Philosophy and Machine Learning Theory. Facial expression emotion recognition is an intuitive reflection of a person's mental state, which contains rich emotional information, and is one of the most important forms of interpersonal communication. It can be used in various fields, including psychology. As a celebrity in ancient China, Zeng …	facial - music - emotion - faces - emotions - recognition - expressions - face - emotion recognition - emotional - musical - facial expressions - audio - eeg - expression - features - facial expression - affective - signals - valence	0.251282	FALSE	Article	pregnancy; emotion; heart rate variability; autonomic system; machine learning; ensemble learning; random forest; gradient boosting trees	2022	9	FRONTIERS IN PSYCHIATRY
Learning Bayesian Networks: A Copula Approach for Mixed-Type Data	19	19_ptsd_trauma_stress disorder_posttraumatic	Topic15-PTSD Detection	['ptsd', 'trauma', 'stress disorder', 'posttraumatic', 'stress', 'posttraumatic stress', 'traumatic', 'symptoms', 'posttraumatic stress disorder', 'childhood', 'stress disorder ptsd', 'disorder ptsd', 'abuse', 'maltreatment', 'traumatic stress', 'exposure', 'post traumatic', 'disorder', 'veterans', 'post traumatic stress']	['Hippocampal Resting-State Functional Connectivity Forecasts Individual Posttraumatic Stress Disorder Symptoms: A Data-Driven Approach. BACKGROUND: Posttraumatic stress disorder (PTSD) is a debilitating disorder, and there is no current accurate prediction of who develops it after trauma. Neurobiologically, individuals with chronic PTSD exhibit aberrant resting-state functional connectivity (rsF…	ptsd - trauma - stress disorder - posttraumatic - stress - posttraumatic stress - traumatic - symptoms - posttraumatic stress disorder - childhood - stress disorder ptsd - disorder ptsd - abuse - maltreatment - traumatic stress - exposure - post traumatic - disorder - veterans - post traumatic stress	0.0894507	FALSE	Article	Bayesian inference; directed acyclic graph; Markov chain Monte Carlo; network psychometrics; structural equation model	2024	0	PSYCHOMETRIKA
Advancing Organizational Science Through Synthetic Data: A Path to Enhanced Data Sharing and Collaboration	16	16_employees_job_employee_ai	Topic18-AI in Organizational Management	['employees', 'job', 'employee', 'ai', 'organizational', 'management', 'organizations', 'hrm', 'leadership', 'career', 'work', 'workplace', 'human resource', 'artificial intelligence', 'intelligence', 'hr', 'artificial', 'technology', 'innovation', 'coaching']	["Job attitudes and career behaviors relating to employees' perceived incorporation of artificial intelligence in the workplace: a career self-management perspective. Purpose Artificial intelligence (AI) continues to be deployed in workplaces. While there are many positive outcomes of AI integration, understanding the extent of its consequences on employees is limited. Hence, this study examines …	employees - job - employee - ai - organizational - management - organizations - hrm - leadership - career - work - workplace - human resource - artificial intelligence - intelligence - hr - artificial - technology - innovation - coaching	0.442755	FALSE	Article; Early Access	Synthetic data; Machine learning; Open science; Data sharing	2024	0	JOURNAL OF BUSINESS AND PSYCHOLOGY
Machine learning models for predicting treatment response in infantile epilepsies	23	23_epilepsy_seizure_seizures_eeg	Topic22-Epilepsy Detection	['epilepsy', 'seizure', 'seizures', 'eeg', 'patients', 'epileptic', 'diagnosis', 'detection', 'brain', 'temporal', 'gyrus', 'classification', 'temporal lobe', 'lobe', 'neurological', 'features', 'functional', 'method', 'clinical', 'fnirs']	['Altered voxel-mirrored homotopic connectivity in right temporal lobe epilepsy as measured using resting-state fMRI and support vector machine analyses. BackgroundPrior reports revealed abnormalities in voxel-mirrored homotopic connectivity (VMHC) when analyzing neuroimaging data from patients with various psychiatric conditions, including temporal lobe epilepsy (TLE). Whether these VHMC changes…	epilepsy - seizure - seizures - eeg - patients - epileptic - diagnosis - detection - brain - temporal - gyrus - classification - temporal lobe - lobe - neurological - features - functional - method - clinical - fnirs	1	FALSE	Article	Machine learning; Drug resistant epilepsy; Epilepsy; Anti seizure medicine; Prediction	2024	1	EPILEPSY & BEHAVIOR
Effects of REM sleep awakenings and related wakening paradigms on the ultradian sleep cycle and the symptoms in depression	21	21_sleep_depression_stress_mood	Topic20-Digital Mental Health Monitoring	['sleep', 'depression', 'stress', 'mood', 'digital phenotyping', 'speech', 'features', 'smartphone', 'phenotyping', 'wearable', 'digital', 'data', 'symptoms', 'depressive', 'passive', 'activity', 'vocal', 'physiological', 'typing', 'using']	['Momentary Depression Severity Prediction in Patients With Acute Depression Who Undergo Sleep Deprivation Therapy: Speech-Based Machine Learning Approach. Background: Mobile devices for remote monitoring are inevitable tools to support treatment and patient care, especially in recurrent diseases such as major depressive disorder. The aim of this study was to learn if machine learning (ML) models…	sleep - depression - stress - mood - digital phenotyping - speech - features - smartphone - phenotyping - wearable - digital - data - symptoms - depressive - passive - activity - vocal - physiological - typing - using	0.0665913	FALSE	Article	depression; REM sleep; REM pressure; sleep deprivation; brief awakenings; Hamilton depression scale	2002	25	JOURNAL OF PSYCHIATRIC RESEARCH
Aberrant sense of agency induced by delayed prediction signals in schizophrenia: a computational modeling study	5	5_schizophrenia_psychosis_patients_controls	Topic8-Schizophrenia Detection	['schizophrenia', 'psychosis', 'patients', 'controls', 'functional', 'patients schizophrenia', 'episode', 'clinical', 'healthy', 'chr', 'schizophrenia patients', 'scz', 'sz', 'antipsychotic', 'healthy controls', 'connectivity', 'fep', 'brain', 'psychotic', 'classification']	['Metacognitive Training Modulates Default-Mode Network Homogeneity During 8-Week Olanzapine Treatment in Patients With Schizophrenia. Background Previous studies have revealed the efficacy of metacognitive training for schizophrenia. However, the underlying mechanisms of metacognitive training on brain function alterations, including the default-mode network (DMN), remain unknown. The present st…	schizophrenia - psychosis - patients - controls - functional - patients schizophrenia - episode - clinical - healthy - chr - schizophrenia patients - scz - sz - antipsychotic - healthy controls - connectivity - fep - brain - psychotic - classification	0.238807	FALSE	Article		2023	4	SCHIZOPHRENIA
Drawing and memory: Using visual production to alleviate concreteness effects	14	14_visual_object_objects_category	Topic11-Visual Processing Mechanism and Modeling	['visual', 'object', 'objects', 'category', 'scene', 'image', 'images', 'vision', 'similarity', 'categorization', 'representations', 'shape', 'categories', 'stimuli', 'scenes', 'neural', 'cnns', 'recognition', 'memory', 'networks']	['A failure to learn object shape geometry: Implications for convolutional neural networks as plausible models of biological vision. Here we examine the plausibility of deep convolutional neural networks (CNNs) as a theoretical framework for understanding biological vision in the context of image classification. Recent work on object recognition in human vision has shown that both global, and loc…	visual - object - objects - category - scene - image - images - vision - similarity - categorization - representations - shape - categories - stimuli - scenes - neural - cnns - recognition - memory - networks	0.143047	FALSE	Article	Drawing effect; Concreteness; Abstract; Memory; Neural network	2021	16	PSYCHONOMIC BULLETIN & REVIEW
Recognition of partially concealed leopards by wild bonnet macaques (Macaca radiata) -: The role of the spotted coat	14	14_visual_object_objects_category	Topic11-Visual Processing Mechanism and Modeling	['visual', 'object', 'objects', 'category', 'scene', 'image', 'images', 'vision', 'similarity', 'categorization', 'representations', 'shape', 'categories', 'stimuli', 'scenes', 'neural', 'cnns', 'recognition', 'memory', 'networks']	['A failure to learn object shape geometry: Implications for convolutional neural networks as plausible models of biological vision. Here we examine the plausibility of deep convolutional neural networks (CNNs) as a theoretical framework for understanding biological vision in the context of image classification. Recent work on object recognition in human vision has shown that both global, and loc…	visual - object - objects - category - scene - image - images - vision - similarity - categorization - representations - shape - categories - stimuli - scenes - neural - cnns - recognition - memory - networks	0.125878	FALSE	Article	antipredator behavior; leopards; bonnet macaques; artificial neural network; pattern recognition	2005	37	BEHAVIOURAL PROCESSES
Tracking Child Language Development With Neural Network Language Models	0	0_language_cognitive_word_computational	Topic1-Human Cognitive Science	['language', 'cognitive', 'word', 'computational', 'neural', 'human', 'representations', 'models', 'cognition', 'knowledge', 'model', 'semantic', 'artificial', 'learning', 'words', 'information', 'cognitive science', 'reasoning', 'representation', 'intelligence']	['Artificial intelligence, human cognition, and conscious supremacy. The computational significance of consciousness is an important and potentially more tractable research theme than the hard problem of consciousness, as one could look at the correlation of consciousness and computational capacities through, e.g., algorithmic or complexity analyses. In the literature, consciousness is defined as…	language - cognitive - word - computational - neural - human - representations - models - cognition - knowledge - model - semantic - artificial - learning - words - information - cognitive science - reasoning - representation - intelligence	0.47151	FALSE	Article	child language assessment; natural language processing; computational linguistics; language model; IPSyn; neural network	2021	3	FRONTIERS IN PSYCHOLOGY
The AI-IP: Minimizing the guesswork of personality scale item development through artificial intelligence	3	3_personality_media_sentiment_social	Topic3-ML-based Personality Assessment	['personality', 'media', 'sentiment', 'social', 'social media', 'text', 'language', 'twitter', 'big', 'online', 'users', 'sentiment analysis', 'traits', 'natural language', 'news', 'content', 'public', 'analysis', 'data', 'psychological']	["Exploring a Language-Based Interest Assessment: Predicting Vocational Interests on Social Media Using Natural Language Processing. For more than a century, self-report inventories have been the traditional method for assessing vocational interests. Little research has examined the use of machine learning techniques, such as natural language processing (NLP), in interest assessment. This paper e…	personality - media - sentiment - social - social media - text - language - twitter - big - online - users - sentiment analysis - traits - natural language - news - content - public - analysis - data - psychological	1	FALSE	Article	artificial intelligence; big data; machine learning; personality; personality assessment; technology	2023	9	PERSONNEL PSYCHOLOGY
Tactical pattern recognition in soccer games by means of special self-organizing maps	20	20_sports_players_athletes_sport	Topic24-AI in Sports Psychology	['sports', 'players', 'athletes', 'sport', 'physical', 'lifting', 'soccer', 'football', 'postures', 'gait', 'education', 'performance', 'training', 'coaches', 'basketball', 'player', 'muscle', 'action', 'body', 'posture']	["Recognizing upper limb movements with wrist worn inertial sensors using k-means clustering classification. In this paper we present a methodology for recognizing three fundamental movements of the human forearm (extension, flexion and rotation) using pattern recognition applied to the data from a single wrist-worn, inertial sensor. We propose that this technique could be used as a clinical tool…	sports - players - athletes - sport - physical - lifting - soccer - football - postures - gait - education - performance - training - coaches - basketball - player - muscle - action - body - posture	1	FALSE	Article	Pattern recognition; Team sport; Neural networks	2012	72	HUMAN MOVEMENT SCIENCE
Smartphone help contents re-organization considering user specification via conditional GAN	3	3_personality_media_sentiment_social	Topic3-ML-based Personality Assessment	['personality', 'media', 'sentiment', 'social', 'social media', 'text', 'language', 'twitter', 'big', 'online', 'users', 'sentiment analysis', 'traits', 'natural language', 'news', 'content', 'public', 'analysis', 'data', 'psychological']	["Exploring a Language-Based Interest Assessment: Predicting Vocational Interests on Social Media Using Natural Language Processing. For more than a century, self-report inventories have been the traditional method for assessing vocational interests. Little research has examined the use of machine learning techniques, such as natural language processing (NLP), in interest assessment. This paper e…	personality - media - sentiment - social - social media - text - language - twitter - big - online - users - sentiment analysis - traits - natural language - news - content - public - analysis - data - psychological	0.0558197	FALSE	Article	Help systems; Contents re-organization; User specification; App usage sequence; Conditional GAN; Seq2seq	2019	2	INTERNATIONAL JOURNAL OF HUMAN-COMPUTER STUDIES
From Cognitive Bias Toward Advanced Computational Intelligence for Smart Infrastructure Monitoring	-1	-1_ocd_gut_gambling_delirium	NOISE	['ocd', 'gut', 'gambling', 'delirium', 'microbiota', 'obsessive', 'obsessive compulsive', 'compulsive', 'gut microbiota', 'patients', 'obsessive compulsive disorder', 'compulsive disorder', 'microbiome', 'igd', 'speech', 'violent', 'risk', 'machine learning', 'machine', 'using']	['Data-driven identification of subtypes of executive function across typical development, attention deficit hyperactivity disorder, and autism spectrum disorders. Background Impairment of executive function (EF), the goal-directed regulation of thoughts, actions, and emotions, drives negative outcomes and is common across neurodevelopmental disorders including attention deficit hyperactivity dis…	ocd - gut - gambling - delirium - microbiota - obsessive - obsessive compulsive - compulsive - gut microbiota - patients - obsessive compulsive disorder - compulsive disorder - microbiome - igd - speech - violent - risk - machine learning - machine - using	0.840248	FALSE	Article	cognitive bias; infrastructure health monitoring; bridge monitoring; artificial intelligence; safety	2022	7	FRONTIERS IN PSYCHOLOGY
Sensory perception relies on fitness-maximizing codes	0	0_language_cognitive_word_computational	Topic1-Human Cognitive Science	['language', 'cognitive', 'word', 'computational', 'neural', 'human', 'representations', 'models', 'cognition', 'knowledge', 'model', 'semantic', 'artificial', 'learning', 'words', 'information', 'cognitive science', 'reasoning', 'representation', 'intelligence']	['Artificial intelligence, human cognition, and conscious supremacy. The computational significance of consciousness is an important and potentially more tractable research theme than the hard problem of consciousness, as one could look at the correlation of consciousness and computational capacities through, e.g., algorithmic or complexity analyses. In the literature, consciousness is defined as…	language - cognitive - word - computational - neural - human - representations - models - cognition - knowledge - model - semantic - artificial - learning - words - information - cognitive science - reasoning - representation - intelligence	1	FALSE	Article		2023	12	NATURE HUMAN BEHAVIOUR
Visual properties and memorising scenes: Effects of image-space sparseness and uniformity	14	14_visual_object_objects_category	Topic11-Visual Processing Mechanism and Modeling	['visual', 'object', 'objects', 'category', 'scene', 'image', 'images', 'vision', 'similarity', 'categorization', 'representations', 'shape', 'categories', 'stimuli', 'scenes', 'neural', 'cnns', 'recognition', 'memory', 'networks']	['A failure to learn object shape geometry: Implications for convolutional neural networks as plausible models of biological vision. Here we examine the plausibility of deep convolutional neural networks (CNNs) as a theoretical framework for understanding biological vision in the context of image classification. Recent work on object recognition in human vision has shown that both global, and loc…	visual - object - objects - category - scene - image - images - vision - similarity - categorization - representations - shape - categories - stimuli - scenes - neural - cnns - recognition - memory - networks	1	FALSE	Article	Scene perception; Memory: visual working and short-term memory; Categorization	2017	16	ATTENTION PERCEPTION & PSYCHOPHYSICS
Predicting dementia development in Parkinson's disease using Bayesian network classifiers	8	8_ad_dementia_mci_alzheimer	Topic10-Alzheimer Detection	['ad', 'dementia', 'mci', 'alzheimer', 'disease', 'alzheimer disease', 'age', 'cognitive impairment', 'brain age', 'brain', 'cognitive', 'impairment', 'aging', 'mild', 'mild cognitive', 'mild cognitive impairment', 'mri', 'aphasia', 'lesion', 'speech']	["Plasma d-glutamate levels for detecting mild cognitive impairment and Alzheimer's disease: Machine learning approaches. Background: d-glutamate, which is involved in N-methyl-d-aspartate receptor modulation, may be associated with cognitive ageing. Aims: This study aimed to use peripheral plasma d-glutamate levels to differentiate patients with mild cognitive impairment (MCI) and Alzheimer's di…	ad - dementia - mci - alzheimer - disease - alzheimer disease - age - cognitive impairment - brain age - brain - cognitive - impairment - aging - mild - mild cognitive - mild cognitive impairment - mri - aphasia - lesion - speech	0.109044	FALSE	Article	MCI; MRI; Neuroimaging; Freesurfer segmentation; Machine learning methods; Feature selection	2013	67	PSYCHIATRY RESEARCH-NEUROIMAGING
The associations between depressive symptoms, functional impairment, and quality of life, in patients with major depression: undirected and Bayesian network analyses	19	19_ptsd_trauma_stress disorder_posttraumatic	Topic15-PTSD Detection	['ptsd', 'trauma', 'stress disorder', 'posttraumatic', 'stress', 'posttraumatic stress', 'traumatic', 'symptoms', 'posttraumatic stress disorder', 'childhood', 'stress disorder ptsd', 'disorder ptsd', 'abuse', 'maltreatment', 'traumatic stress', 'exposure', 'post traumatic', 'disorder', 'veterans', 'post traumatic stress']	['Hippocampal Resting-State Functional Connectivity Forecasts Individual Posttraumatic Stress Disorder Symptoms: A Data-Driven Approach. BACKGROUND: Posttraumatic stress disorder (PTSD) is a debilitating disorder, and there is no current accurate prediction of who develops it after trauma. Neurobiologically, individuals with chronic PTSD exhibit aberrant resting-state functional connectivity (rsF…	ptsd - trauma - stress disorder - posttraumatic - stress - posttraumatic stress - traumatic - symptoms - posttraumatic stress disorder - childhood - stress disorder ptsd - disorder ptsd - abuse - maltreatment - traumatic stress - exposure - post traumatic - disorder - veterans - post traumatic stress	0.0898635	FALSE	Article	Functioning disability; life satisfaction; major depressive disorder; network analysis	2023	13	PSYCHOLOGICAL MEDICINE
Perception of 3D shape integrates intuitive physics and analysis-by-synthesis	14	14_visual_object_objects_category	Topic11-Visual Processing Mechanism and Modeling	['visual', 'object', 'objects', 'category', 'scene', 'image', 'images', 'vision', 'similarity', 'categorization', 'representations', 'shape', 'categories', 'stimuli', 'scenes', 'neural', 'cnns', 'recognition', 'memory', 'networks']	['A failure to learn object shape geometry: Implications for convolutional neural networks as plausible models of biological vision. Here we examine the plausibility of deep convolutional neural networks (CNNs) as a theoretical framework for understanding biological vision in the context of image classification. Recent work on object recognition in human vision has shown that both global, and loc…	visual - object - objects - category - scene - image - images - vision - similarity - categorization - representations - shape - categories - stimuli - scenes - neural - cnns - recognition - memory - networks	1	FALSE	Article		2024	1	NATURE HUMAN BEHAVIOUR
Embodied Dyadic Interaction Increases Complexity of Neural Dynamics: A Minimal Agent-Based Simulation Model	0	0_language_cognitive_word_computational	Topic1-Human Cognitive Science	['language', 'cognitive', 'word', 'computational', 'neural', 'human', 'representations', 'models', 'cognition', 'knowledge', 'model', 'semantic', 'artificial', 'learning', 'words', 'information', 'cognitive science', 'reasoning', 'representation', 'intelligence']	['Artificial intelligence, human cognition, and conscious supremacy. The computational significance of consciousness is an important and potentially more tractable research theme than the hard problem of consciousness, as one could look at the correlation of consciousness and computational capacities through, e.g., algorithmic or complexity analyses. In the literature, consciousness is defined as…	language - cognitive - word - computational - neural - human - representations - models - cognition - knowledge - model - semantic - artificial - learning - words - information - cognitive science - reasoning - representation - intelligence	1	FALSE	Article	social interaction; agent-based models; artificial neural networks; evolutionary robotics; embodied cognition	2019	19	FRONTIERS IN PSYCHOLOGY
Using the R-MAPE index as a resistant measure of forecast accuracy	3	3_personality_media_sentiment_social	Topic3-ML-based Personality Assessment	['personality', 'media', 'sentiment', 'social', 'social media', 'text', 'language', 'twitter', 'big', 'online', 'users', 'sentiment analysis', 'traits', 'natural language', 'news', 'content', 'public', 'analysis', 'data', 'psychological']	["Exploring a Language-Based Interest Assessment: Predicting Vocational Interests on Social Media Using Natural Language Processing. For more than a century, self-report inventories have been the traditional method for assessing vocational interests. Little research has examined the use of machine learning techniques, such as natural language processing (NLP), in interest assessment. This paper e…	personality - media - sentiment - social - social media - text - language - twitter - big - online - users - sentiment analysis - traits - natural language - news - content - public - analysis - data - psychological	0.0586542	FALSE	Article	Time series; error measures; outliers; neural networks; ARIMA models	2013	178	PSICOTHEMA
Do you like it or not? Identifying preference using an electroencephalogram during the viewing of short videos	6	6_facial_music_emotion_faces	Topic9-Affective Computing	['facial', 'music', 'emotion', 'faces', 'emotions', 'recognition', 'expressions', 'face', 'emotion recognition', 'emotional', 'musical', 'facial expressions', 'audio', 'eeg', 'expression', 'features', 'facial expression', 'affective', 'signals', 'valence']	["Facial Expression Emotion Recognition Model Integrating Philosophy and Machine Learning Theory. Facial expression emotion recognition is an intuitive reflection of a person's mental state, which contains rich emotional information, and is one of the most important forms of interpersonal communication. It can be used in various fields, including psychology. As a celebrity in ancient China, Zeng …	facial - music - emotion - faces - emotions - recognition - expressions - face - emotion recognition - emotional - musical - facial expressions - audio - eeg - expression - features - facial expression - affective - signals - valence	0.221288	FALSE	Article	EEG; machine learning; preferences; short videos	2023	1	PSYCH JOURNAL
SHAP value-based ERP analysis (SHERPA): Increasing the sensitivity of EEG signals with explainable AI methods	17	17_bci_eeg_gaze_eye	Topic23-Brain-Computer Interface	['bci', 'eeg', 'gaze', 'eye', 'brain computer', 'signals', 'mi', 'fnirs', 'brain computer interface', 'classification', 'computer interface', 'signal', 'motor imagery', 'motor', 'bcis', 'computer', 'imagery', 'decoding', 'eeg signals', 'interface']	['Artificial Intelligence Algorithms in Visual Evoked Potential-Based Brain-Computer Interfaces for Motor Rehabilitation Applications: Systematic Review and Future Directions. Brain-Computer Interface (BCI) is a technology that uses electroencephalographic (EEG) signals to control external devices, such as Functional Electrical Stimulation (FES). Visual BCI paradigms based on P300 and Steady Stat…	bci - eeg - gaze - eye - brain computer - signals - mi - fnirs - brain computer interface - classification - computer interface - signal - motor imagery - motor - bcis - computer - imagery - decoding - eeg signals - interface	1	FALSE	Article	Explainable AI; ERP analysis; EEG; SHAP; Deep learning; Feature importance	2024	3	BEHAVIOR RESEARCH METHODS
Building machines that learn and think like people	0	0_language_cognitive_word_computational	Topic1-Human Cognitive Science	['language', 'cognitive', 'word', 'computational', 'neural', 'human', 'representations', 'models', 'cognition', 'knowledge', 'model', 'semantic', 'artificial', 'learning', 'words', 'information', 'cognitive science', 'reasoning', 'representation', 'intelligence']	['Artificial intelligence, human cognition, and conscious supremacy. The computational significance of consciousness is an important and potentially more tractable research theme than the hard problem of consciousness, as one could look at the correlation of consciousness and computational capacities through, e.g., algorithmic or complexity analyses. In the literature, consciousness is defined as…	language - cognitive - word - computational - neural - human - representations - models - cognition - knowledge - model - semantic - artificial - learning - words - information - cognitive science - reasoning - representation - intelligence	0.370331	FALSE	Article		2017	1272	BEHAVIORAL AND BRAIN SCIENCES
Educational models for cognition: Methodology of modeling intellectual skills for intelligent tutoring systems	2	2_students_teaching_education_teachers	Topic4-AI in Educational Psychology	['students', 'teaching', 'education', 'teachers', 'learning', 'educational', 'student', 'academic', 'ai', 'writing', 'college', 'learners', 'literacy', 'deep', 'deep learning', 'college students', 'classroom', 'motivation', 'teacher', 'english']	["Relationship between teacher's ability model and students' behavior based on emotion-behavior relevance theory and artificial intelligence technology under the background of curriculum ideological and political education. Purpose: This paper aims to fully understand the relationship between students' classroom emotions and teachers' behaviors in the teaching environment, provide personalized te…	students - teaching - education - teachers - learning - educational - student - academic - ai - writing - college - learners - literacy - deep - deep learning - college students - classroom - motivation - teacher - english	0.426797	FALSE	Article	Reasoning modeling; Constraint -based modeling; Intelligent tutoring systems	2024	0	COGNITIVE SYSTEMS RESEARCH
Modeling the Contribution of Genetic Variation to Cognitive Gains Following Training with a Machine Learning Approach	26	26_adhd_hyperactivity_hyperactivity disorder_deficit hyperactivity disorder	Topic27-ADHD Detection	['adhd', 'hyperactivity', 'hyperactivity disorder', 'deficit hyperactivity disorder', 'deficit hyperactivity', 'attention deficit', 'attention deficit hyperactivity', 'deficit', 'disorder adhd', 'hyperactivity disorder adhd', 'attention', 'children', 'children adhd', 'adult adhd', 'adhd symptoms', 'disorder', 'adult', 'adhd diagnosis', 'symptoms', 'diagnosis']	['Application and Expansion of an Algorithm Predicting Attention-Deficit/Hyperactivity Disorder and Impairment in a Predominantly White Sample. Current assessment protocols for attention-deficit/hyperactivity disorder (ADHD) focus heavily on a set of highly overlapping symptoms, with well-validated factors like cognitive disengagement syndrome (CDS), executive function (EF), age, sex, and race an…	adhd - hyperactivity - hyperactivity disorder - deficit hyperactivity disorder - deficit hyperactivity - attention deficit - attention deficit hyperactivity - deficit - disorder adhd - hyperactivity disorder adhd - attention - children - children adhd - adult adhd - adhd symptoms - disorder - adult - adhd diagnosis - symptoms - diagnosis	1	FALSE	Article		2022	2	MIND BRAIN AND EDUCATION
Using Machine Learning for Motion Analysis to Early Detect Autism Spectrum Disorder: A Systematic Review	7	7_asd_autism_autism spectrum_autism spectrum disorder	Topic12-Autism Detection	['asd', 'autism', 'autism spectrum', 'autism spectrum disorder', 'spectrum disorder', 'spectrum', 'children', 'autistic', 'spectrum disorder asd', 'disorder asd', 'children asd', 'disorder', 'td', 'children autism', 'individuals asd', 'neurodevelopmental', 'social', 'typically developing', 'children autism spectrum', 'toddlers']	['Aberrant Functional Connectivity of Neural Circuits Associated with Social and Sensorimotor Deficits in Young Children with Autism Spectrum Disorder. Autism spectrum disorder (ASD) is a neurodevelopmental disorder characterized by atypical functional integration of brain regions. The vast majority of neuroimaging studies of ASD have focused on older children, adolescents, and adults with the di…	asd - autism - autism spectrum - autism spectrum disorder - spectrum disorder - spectrum - children - autistic - spectrum disorder asd - disorder asd - children asd - disorder - td - children autism - individuals asd - neurodevelopmental - social - typically developing - children autism spectrum - toddlers	1	FALSE	Review; Early Access	Machine learning; Autism spectrum disorder; Early diagnosis; Biomarkers; Wearable sensors	2024	7	REVIEW JOURNAL OF AUTISM AND DEVELOPMENTAL DISORDERS
Decoding Intracranial EEG With Machine Learning: A Systematic Review	23	23_epilepsy_seizure_seizures_eeg	Topic22-Epilepsy Detection	['epilepsy', 'seizure', 'seizures', 'eeg', 'patients', 'epileptic', 'diagnosis', 'detection', 'brain', 'temporal', 'gyrus', 'classification', 'temporal lobe', 'lobe', 'neurological', 'features', 'functional', 'method', 'clinical', 'fnirs']	['Altered voxel-mirrored homotopic connectivity in right temporal lobe epilepsy as measured using resting-state fMRI and support vector machine analyses. BackgroundPrior reports revealed abnormalities in voxel-mirrored homotopic connectivity (VMHC) when analyzing neuroimaging data from patients with various psychiatric conditions, including temporal lobe epilepsy (TLE). Whether these VHMC changes…	epilepsy - seizure - seizures - eeg - patients - epileptic - diagnosis - detection - brain - temporal - gyrus - classification - temporal lobe - lobe - neurological - features - functional - method - clinical - fnirs	1	FALSE	Review	intracranial EEG (iEEG); seizure; epilepsy; neurorecording; machine learning; artificial intelligence; deep learning	2022	6	FRONTIERS IN HUMAN NEUROSCIENCE
Mental states and personality based on real-time physical activity and facial expression recognition	21	21_sleep_depression_stress_mood	Topic20-Digital Mental Health Monitoring	['sleep', 'depression', 'stress', 'mood', 'digital phenotyping', 'speech', 'features', 'smartphone', 'phenotyping', 'wearable', 'digital', 'data', 'symptoms', 'depressive', 'passive', 'activity', 'vocal', 'physiological', 'typing', 'using']	['Momentary Depression Severity Prediction in Patients With Acute Depression Who Undergo Sleep Deprivation Therapy: Speech-Based Machine Learning Approach. Background: Mobile devices for remote monitoring are inevitable tools to support treatment and patient care, especially in recurrent diseases such as major depressive disorder. The aim of this study was to learn if machine learning (ML) models…	sleep - depression - stress - mood - digital phenotyping - speech - features - smartphone - phenotyping - wearable - digital - data - symptoms - depressive - passive - activity - vocal - physiological - typing - using	1	FALSE	Article	emotion calculation; expression recognition; five factor model; Russell's circumplex model; mental health	2023	1	FRONTIERS IN PSYCHIATRY
Post-lesion lateralisation shifts in a computational model of single-word reading	8	8_ad_dementia_mci_alzheimer	Topic10-Alzheimer Detection	['ad', 'dementia', 'mci', 'alzheimer', 'disease', 'alzheimer disease', 'age', 'cognitive impairment', 'brain age', 'brain', 'cognitive', 'impairment', 'aging', 'mild', 'mild cognitive', 'mild cognitive impairment', 'mri', 'aphasia', 'lesion', 'speech']	["Plasma d-glutamate levels for detecting mild cognitive impairment and Alzheimer's disease: Machine learning approaches. Background: d-glutamate, which is involved in N-methyl-d-aspartate receptor modulation, may be associated with cognitive ageing. Aims: This study aimed to use peripheral plasma d-glutamate levels to differentiate patients with mild cognitive impairment (MCI) and Alzheimer's di…	ad - dementia - mci - alzheimer - disease - alzheimer disease - age - cognitive impairment - brain age - brain - cognitive - impairment - aging - mild - mild cognitive - mild cognitive impairment - mri - aphasia - lesion - speech	0.102185	FALSE	Article		2000	10	LATERALITY
Depression signal correlation identification from different EEG channels based on CNN feature extraction	12	12_mdd_functional_brain_bd	Topic6-AI Assisted Neuroimaging Analysis	['mdd', 'functional', 'brain', 'bd', 'connectivity', 'patients', 'disorder', 'depressive', 'depression', 'depressive disorder', 'major depressive disorder', 'major depressive', 'resting', 'resting state', 'gyrus', 'functional connectivity', 'bipolar', 'treatment', 'imaging', 'healthy']	['Morinda officinalis oligosaccharides modulate the default-mode network homogeneity in major depressive disorder at rest. Background: While prior studies have explored the efficacy of Morinda officinalis oligosaccharides (MOs) as a treatment for patients with major depressive disorder (MDD), the mechanistic basis for the effects of MOs on brain function or the default-mode network (DMN) has yet …	mdd - functional - brain - bd - connectivity - patients - disorder - depressive - depression - depressive disorder - major depressive disorder - major depressive - resting - resting state - gyrus - functional connectivity - bipolar - treatment - imaging - healthy	0.0654227	FALSE	Article	Depression; EEG; CNN; Feature extraction	2023	20	PSYCHIATRY RESEARCH-NEUROIMAGING
Predictive processing of scenes and objects	14	14_visual_object_objects_category	Topic11-Visual Processing Mechanism and Modeling	['visual', 'object', 'objects', 'category', 'scene', 'image', 'images', 'vision', 'similarity', 'categorization', 'representations', 'shape', 'categories', 'stimuli', 'scenes', 'neural', 'cnns', 'recognition', 'memory', 'networks']	['A failure to learn object shape geometry: Implications for convolutional neural networks as plausible models of biological vision. Here we examine the plausibility of deep convolutional neural networks (CNNs) as a theoretical framework for understanding biological vision in the context of image classification. Recent work on object recognition in human vision has shown that both global, and loc…	visual - object - objects - category - scene - image - images - vision - similarity - categorization - representations - shape - categories - stimuli - scenes - neural - cnns - recognition - memory - networks	1	FALSE	Review		2024	6	NATURE REVIEWS PSYCHOLOGY
Fear-induced brain activations distinguish anxious and trauma-exposed brains	12	12_mdd_functional_brain_bd	Topic6-AI Assisted Neuroimaging Analysis	['mdd', 'functional', 'brain', 'bd', 'connectivity', 'patients', 'disorder', 'depressive', 'depression', 'depressive disorder', 'major depressive disorder', 'major depressive', 'resting', 'resting state', 'gyrus', 'functional connectivity', 'bipolar', 'treatment', 'imaging', 'healthy']	['Morinda officinalis oligosaccharides modulate the default-mode network homogeneity in major depressive disorder at rest. Background: While prior studies have explored the efficacy of Morinda officinalis oligosaccharides (MOs) as a treatment for patients with major depressive disorder (MDD), the mechanistic basis for the effects of MOs on brain function or the default-mode network (DMN) has yet …	mdd - functional - brain - bd - connectivity - patients - disorder - depressive - depression - depressive disorder - major depressive disorder - major depressive - resting - resting state - gyrus - functional connectivity - bipolar - treatment - imaging - healthy	0.109662	FALSE	Article		2021	7	TRANSLATIONAL PSYCHIATRY
On metrics for measuring scanpath similarity	14	14_visual_object_objects_category	Topic11-Visual Processing Mechanism and Modeling	['visual', 'object', 'objects', 'category', 'scene', 'image', 'images', 'vision', 'similarity', 'categorization', 'representations', 'shape', 'categories', 'stimuli', 'scenes', 'neural', 'cnns', 'recognition', 'memory', 'networks']	['A failure to learn object shape geometry: Implications for convolutional neural networks as plausible models of biological vision. Here we examine the plausibility of deep convolutional neural networks (CNNs) as a theoretical framework for understanding biological vision in the context of image classification. Recent work on object recognition in human vision has shown that both global, and loc…	visual - object - objects - category - scene - image - images - vision - similarity - categorization - representations - shape - categories - stimuli - scenes - neural - cnns - recognition - memory - networks	1	FALSE	Article	Saliency; Visual attention; Eye movement; Scanpath	2021	21	BEHAVIOR RESEARCH METHODS
Identification and Impact Analysis of Family History of Psychiatric Disorder in Mood Disorder Patients With Pretrained Language Model	25	25_nlp_language_health_natural language processing	Topic19-NLP-based Mental Health Assessment	['nlp', 'language', 'health', 'natural language processing', 'natural language', 'language processing', 'mental health', 'mental', 'chatgpt', 'natural', 'loneliness', 'clinical', 'processing', 'llms', 'text', 'psychotherapy', 'speech', 'processing nlp', 'language processing nlp', 'gpt']	["Predicting Patients' Satisfaction With Mental Health Drug Treatment Using Their Reviews: Unified Interchangeable Model Fusion Approach. Background: After the COVID-19 pandemic, the conflict between limited mental health care resources and the rapidly growing number of patients has become more pronounced. It is necessary for psychologists to borrow artificial intelligence (AI)-based methods to a…	nlp - language - health - natural language processing - natural language - language processing - mental health - mental - chatgpt - natural - loneliness - clinical - processing - llms - text - psychotherapy - speech - processing nlp - language processing nlp - gpt	0.614437	FALSE	Article	family history; mood disorder; psychiatric disorder; electronic health records; pretrained BERT CNN model	2022	1	FRONTIERS IN PSYCHIATRY
Individual differences during acquisition predict shifts in generalization	14	14_visual_object_objects_category	Topic11-Visual Processing Mechanism and Modeling	['visual', 'object', 'objects', 'category', 'scene', 'image', 'images', 'vision', 'similarity', 'categorization', 'representations', 'shape', 'categories', 'stimuli', 'scenes', 'neural', 'cnns', 'recognition', 'memory', 'networks']	['A failure to learn object shape geometry: Implications for convolutional neural networks as plausible models of biological vision. Here we examine the plausibility of deep convolutional neural networks (CNNs) as a theoretical framework for understanding biological vision in the context of image classification. Recent work on object recognition in human vision has shown that both global, and loc…	visual - object - objects - category - scene - image - images - vision - similarity - categorization - representations - shape - categories - stimuli - scenes - neural - cnns - recognition - memory - networks	0.311619	FALSE	Article	Generalization gradient; Peak shift; Signal detection theory; Individual differences; Perceptual learning; Artificial neural network	2014	12	BEHAVIOURAL PROCESSES
Visual numerosity perception shows no advantage in real-world scenes compared to artificial displays	0	0_language_cognitive_word_computational	Topic1-Human Cognitive Science	['language', 'cognitive', 'word', 'computational', 'neural', 'human', 'representations', 'models', 'cognition', 'knowledge', 'model', 'semantic', 'artificial', 'learning', 'words', 'information', 'cognitive science', 'reasoning', 'representation', 'intelligence']	['Artificial intelligence, human cognition, and conscious supremacy. The computational significance of consciousness is an important and potentially more tractable research theme than the hard problem of consciousness, as one could look at the correlation of consciousness and computational capacities through, e.g., algorithmic or complexity analyses. In the literature, consciousness is defined as…	language - cognitive - word - computational - neural - human - representations - models - cognition - knowledge - model - semantic - artificial - learning - words - information - cognitive science - reasoning - representation - intelligence	0.0969943	FALSE	Article	Approximate number system; Number estimation; Scene perception	2023	4	COGNITION
Corticostriatal response selection in sentence production: Insights from neural network simulation with reservoir computing	0	0_language_cognitive_word_computational	Topic1-Human Cognitive Science	['language', 'cognitive', 'word', 'computational', 'neural', 'human', 'representations', 'models', 'cognition', 'knowledge', 'model', 'semantic', 'artificial', 'learning', 'words', 'information', 'cognitive science', 'reasoning', 'representation', 'intelligence']	['Artificial intelligence, human cognition, and conscious supremacy. The computational significance of consciousness is an important and potentially more tractable research theme than the hard problem of consciousness, as one could look at the correlation of consciousness and computational capacities through, e.g., algorithmic or complexity analyses. In the literature, consciousness is defined as…	language - cognitive - word - computational - neural - human - representations - models - cognition - knowledge - model - semantic - artificial - learning - words - information - cognitive science - reasoning - representation - intelligence	1	FALSE	Article	Sentence production; Corticostriatal system; Language; Model; Neural network	2015	20	BRAIN AND LANGUAGE
Attachment style and prenatal expectations from a Bayesian perspective	-1	-1_ocd_gut_gambling_delirium	NOISE	['ocd', 'gut', 'gambling', 'delirium', 'microbiota', 'obsessive', 'obsessive compulsive', 'compulsive', 'gut microbiota', 'patients', 'obsessive compulsive disorder', 'compulsive disorder', 'microbiome', 'igd', 'speech', 'violent', 'risk', 'machine learning', 'machine', 'using']	['Data-driven identification of subtypes of executive function across typical development, attention deficit hyperactivity disorder, and autism spectrum disorders. Background Impairment of executive function (EF), the goal-directed regulation of thoughts, actions, and emotions, drives negative outcomes and is common across neurodevelopmental disorders including attention deficit hyperactivity dis…	ocd - gut - gambling - delirium - microbiota - obsessive - obsessive compulsive - compulsive - gut microbiota - patients - obsessive compulsive disorder - compulsive disorder - microbiome - igd - speech - violent - risk - machine learning - machine - using	0.52443	FALSE	Article	attachment style; parenting representations; prenatal expectations; bayesian models; caregiving system	2020	5	PSICOTHEMA
Modelling phenomenological differences in aetiologically distinct visual hallucinations using deep neural networks	-1	-1_ocd_gut_gambling_delirium	NOISE	['ocd', 'gut', 'gambling', 'delirium', 'microbiota', 'obsessive', 'obsessive compulsive', 'compulsive', 'gut microbiota', 'patients', 'obsessive compulsive disorder', 'compulsive disorder', 'microbiome', 'igd', 'speech', 'violent', 'risk', 'machine learning', 'machine', 'using']	['Data-driven identification of subtypes of executive function across typical development, attention deficit hyperactivity disorder, and autism spectrum disorders. Background Impairment of executive function (EF), the goal-directed regulation of thoughts, actions, and emotions, drives negative outcomes and is common across neurodevelopmental disorders including attention deficit hyperactivity dis…	ocd - gut - gambling - delirium - microbiota - obsessive - obsessive compulsive - compulsive - gut microbiota - patients - obsessive compulsive disorder - compulsive disorder - microbiome - igd - speech - violent - risk - machine learning - machine - using	0.84236	FALSE	Article	visual hallucinations; machine learning; Parkinson's disease; Lewy Body Dementia; Charles Bonnet Syndrome; psychedelics; phenomenology; computational neurophenomenology	2024	3	FRONTIERS IN HUMAN NEUROSCIENCE
The power of multivariate approach in identifying EEG correlates of interlimb coupling	17	17_bci_eeg_gaze_eye	Topic23-Brain-Computer Interface	['bci', 'eeg', 'gaze', 'eye', 'brain computer', 'signals', 'mi', 'fnirs', 'brain computer interface', 'classification', 'computer interface', 'signal', 'motor imagery', 'motor', 'bcis', 'computer', 'imagery', 'decoding', 'eeg signals', 'interface']	['Artificial Intelligence Algorithms in Visual Evoked Potential-Based Brain-Computer Interfaces for Motor Rehabilitation Applications: Systematic Review and Future Directions. Brain-Computer Interface (BCI) is a technology that uses electroencephalographic (EEG) signals to control external devices, such as Functional Electrical Stimulation (FES). Visual BCI paradigms based on P300 and Steady Stat…	bci - eeg - gaze - eye - brain computer - signals - mi - fnirs - brain computer interface - classification - computer interface - signal - motor imagery - motor - bcis - computer - imagery - decoding - eeg signals - interface	1	FALSE	Article	EEG; interlimb coupling; multivariate analysis; bimanual coordination; artificial neural network	2023	0	FRONTIERS IN HUMAN NEUROSCIENCE
Deep unsupervised learning on a desktop PC: a primer for cognitive scientists	14	14_visual_object_objects_category	Topic11-Visual Processing Mechanism and Modeling	['visual', 'object', 'objects', 'category', 'scene', 'image', 'images', 'vision', 'similarity', 'categorization', 'representations', 'shape', 'categories', 'stimuli', 'scenes', 'neural', 'cnns', 'recognition', 'memory', 'networks']	['A failure to learn object shape geometry: Implications for convolutional neural networks as plausible models of biological vision. Here we examine the plausibility of deep convolutional neural networks (CNNs) as a theoretical framework for understanding biological vision in the context of image classification. Recent work on object recognition in human vision has shown that both global, and loc…	visual - object - objects - category - scene - image - images - vision - similarity - categorization - representations - shape - categories - stimuli - scenes - neural - cnns - recognition - memory - networks	0.151156	FALSE	Article	deep neural networks; unsupervised learning; hierarchical generative models; cognitive modeling; parallel-computing architectures; GPUs; MPI; computer cluster	2013	23	FRONTIERS IN PSYCHOLOGY
Strange but True: Corroboration and Base Rate Neglect	0	0_language_cognitive_word_computational	Topic1-Human Cognitive Science	['language', 'cognitive', 'word', 'computational', 'neural', 'human', 'representations', 'models', 'cognition', 'knowledge', 'model', 'semantic', 'artificial', 'learning', 'words', 'information', 'cognitive science', 'reasoning', 'representation', 'intelligence']	['Artificial intelligence, human cognition, and conscious supremacy. The computational significance of consciousness is an important and potentially more tractable research theme than the hard problem of consciousness, as one could look at the correlation of consciousness and computational capacities through, e.g., algorithmic or complexity analyses. In the literature, consciousness is defined as…	language - cognitive - word - computational - neural - human - representations - models - cognition - knowledge - model - semantic - artificial - learning - words - information - cognitive science - reasoning - representation - intelligence	0.0847204	FALSE	Article	base rate neglect; coherence; cognitive bias; evidential reasoning; probabilistic reasoning	2021	2	JOURNAL OF EXPERIMENTAL PSYCHOLOGY-LEARNING MEMORY AND COGNITION
An artificial neural network model for clinical score prediction in Alzheimer disease using structural neuroimaging measures	8	8_ad_dementia_mci_alzheimer	Topic10-Alzheimer Detection	['ad', 'dementia', 'mci', 'alzheimer', 'disease', 'alzheimer disease', 'age', 'cognitive impairment', 'brain age', 'brain', 'cognitive', 'impairment', 'aging', 'mild', 'mild cognitive', 'mild cognitive impairment', 'mri', 'aphasia', 'lesion', 'speech']	["Plasma d-glutamate levels for detecting mild cognitive impairment and Alzheimer's disease: Machine learning approaches. Background: d-glutamate, which is involved in N-methyl-d-aspartate receptor modulation, may be associated with cognitive ageing. Aims: This study aimed to use peripheral plasma d-glutamate levels to differentiate patients with mild cognitive impairment (MCI) and Alzheimer's di…	ad - dementia - mci - alzheimer - disease - alzheimer disease - age - cognitive impairment - brain age - brain - cognitive - impairment - aging - mild - mild cognitive - mild cognitive impairment - mri - aphasia - lesion - speech	1	FALSE	Article		2019	30	JOURNAL OF PSYCHIATRY & NEUROSCIENCE
Autoshaped choice in artificial neural networks: Implications for behavioral economics and neuroeconomics	0	0_language_cognitive_word_computational	Topic1-Human Cognitive Science	['language', 'cognitive', 'word', 'computational', 'neural', 'human', 'representations', 'models', 'cognition', 'knowledge', 'model', 'semantic', 'artificial', 'learning', 'words', 'information', 'cognitive science', 'reasoning', 'representation', 'intelligence']	['Artificial intelligence, human cognition, and conscious supremacy. The computational significance of consciousness is an important and potentially more tractable research theme than the hard problem of consciousness, as one could look at the correlation of consciousness and computational capacities through, e.g., algorithmic or complexity analyses. In the literature, consciousness is defined as…	language - cognitive - word - computational - neural - human - representations - models - cognition - knowledge - model - semantic - artificial - learning - words - information - cognitive science - reasoning - representation - intelligence	0.216199	FALSE	Article	Autoshaped choice; Pavlovian contingencies; Behavioral economics; Neuroeconomics; Neural networks	2015	6	BEHAVIOURAL PROCESSES
The Role of Mindfulness, Mind Wandering, Attentional Control, and Maladaptive Personality Traits in Problematic Gaming Behavior	-1	-1_ocd_gut_gambling_delirium	NOISE	['ocd', 'gut', 'gambling', 'delirium', 'microbiota', 'obsessive', 'obsessive compulsive', 'compulsive', 'gut microbiota', 'patients', 'obsessive compulsive disorder', 'compulsive disorder', 'microbiome', 'igd', 'speech', 'violent', 'risk', 'machine learning', 'machine', 'using']	['Data-driven identification of subtypes of executive function across typical development, attention deficit hyperactivity disorder, and autism spectrum disorders. Background Impairment of executive function (EF), the goal-directed regulation of thoughts, actions, and emotions, drives negative outcomes and is common across neurodevelopmental disorders including attention deficit hyperactivity dis…	ocd - gut - gambling - delirium - microbiota - obsessive - obsessive compulsive - compulsive - gut microbiota - patients - obsessive compulsive disorder - compulsive disorder - microbiome - igd - speech - violent - risk - machine learning - machine - using	0.881345	FALSE	Article	Gaming addiction; Gaming disorder; Mindfulness; Mind wandering; Attentional control; Maladaptive personality traits	2023	10	MINDFULNESS
How much intelligence is there in artificial intelligence? A 2020 update	0	0_language_cognitive_word_computational	Topic1-Human Cognitive Science	['language', 'cognitive', 'word', 'computational', 'neural', 'human', 'representations', 'models', 'cognition', 'knowledge', 'model', 'semantic', 'artificial', 'learning', 'words', 'information', 'cognitive science', 'reasoning', 'representation', 'intelligence']	['Artificial intelligence, human cognition, and conscious supremacy. The computational significance of consciousness is an important and potentially more tractable research theme than the hard problem of consciousness, as one could look at the correlation of consciousness and computational capacities through, e.g., algorithmic or complexity analyses. In the literature, consciousness is defined as…	language - cognitive - word - computational - neural - human - representations - models - cognition - knowledge - model - semantic - artificial - learning - words - information - cognitive science - reasoning - representation - intelligence	0.327638	FALSE	Article	Artificial Intelligence; Deep learning; Individual differences; Intelligence tests; Reinforcement	2021	18	INTELLIGENCE
Decimal fraction representations are not distinct from natural number representations - evidence from a combined eye-tracking and computational modeling approach	0	0_language_cognitive_word_computational	Topic1-Human Cognitive Science	['language', 'cognitive', 'word', 'computational', 'neural', 'human', 'representations', 'models', 'cognition', 'knowledge', 'model', 'semantic', 'artificial', 'learning', 'words', 'information', 'cognitive science', 'reasoning', 'representation', 'intelligence']	['Artificial intelligence, human cognition, and conscious supremacy. The computational significance of consciousness is an important and potentially more tractable research theme than the hard problem of consciousness, as one could look at the correlation of consciousness and computational capacities through, e.g., algorithmic or complexity analyses. In the literature, consciousness is defined as…	language - cognitive - word - computational - neural - human - representations - models - cognition - knowledge - model - semantic - artificial - learning - words - information - cognitive science - reasoning - representation - intelligence	0.0963871	FALSE	Article	number comparison; decimal fractions; compatibility effect; string length congruity effect; computational modeling; artificial neural network	2014	42	FRONTIERS IN HUMAN NEUROSCIENCE
Surgical face masks impair human face matching performance for familiar and unfamiliar faces	6	6_facial_music_emotion_faces	Topic9-Affective Computing	['facial', 'music', 'emotion', 'faces', 'emotions', 'recognition', 'expressions', 'face', 'emotion recognition', 'emotional', 'musical', 'facial expressions', 'audio', 'eeg', 'expression', 'features', 'facial expression', 'affective', 'signals', 'valence']	["Facial Expression Emotion Recognition Model Integrating Philosophy and Machine Learning Theory. Facial expression emotion recognition is an intuitive reflection of a person's mental state, which contains rich emotional information, and is one of the most important forms of interpersonal communication. It can be used in various fields, including psychology. As a celebrity in ancient China, Zeng …	facial - music - emotion - faces - emotions - recognition - expressions - face - emotion recognition - emotional - musical - facial expressions - audio - eeg - expression - features - facial expression - affective - signals - valence	0.0713361	FALSE	Article	Face recognition; Identity verification; Familiarity; Deep neural network; Signal detection theory	2020	106	COGNITIVE RESEARCH-PRINCIPLES AND IMPLICATIONS
A network perspective on abnormal child behavior in primary school students	19	19_ptsd_trauma_stress disorder_posttraumatic	Topic15-PTSD Detection	['ptsd', 'trauma', 'stress disorder', 'posttraumatic', 'stress', 'posttraumatic stress', 'traumatic', 'symptoms', 'posttraumatic stress disorder', 'childhood', 'stress disorder ptsd', 'disorder ptsd', 'abuse', 'maltreatment', 'traumatic stress', 'exposure', 'post traumatic', 'disorder', 'veterans', 'post traumatic stress']	['Hippocampal Resting-State Functional Connectivity Forecasts Individual Posttraumatic Stress Disorder Symptoms: A Data-Driven Approach. BACKGROUND: Posttraumatic stress disorder (PTSD) is a debilitating disorder, and there is no current accurate prediction of who develops it after trauma. Neurobiologically, individuals with chronic PTSD exhibit aberrant resting-state functional connectivity (rsF…	ptsd - trauma - stress disorder - posttraumatic - stress - posttraumatic stress - traumatic - symptoms - posttraumatic stress disorder - childhood - stress disorder ptsd - disorder ptsd - abuse - maltreatment - traumatic stress - exposure - post traumatic - disorder - veterans - post traumatic stress	0.0874807	FALSE	Article	ADHD; network analysis; complexity; children; Bayesian networks	2023	0	PSYCHOLOGICAL REPORTS
Are there any 'object detectors' in the hidden layers of CNNs trained to identify objects or scenes?	14	14_visual_object_objects_category	Topic11-Visual Processing Mechanism and Modeling	['visual', 'object', 'objects', 'category', 'scene', 'image', 'images', 'vision', 'similarity', 'categorization', 'representations', 'shape', 'categories', 'stimuli', 'scenes', 'neural', 'cnns', 'recognition', 'memory', 'networks']	['A failure to learn object shape geometry: Implications for convolutional neural networks as plausible models of biological vision. Here we examine the plausibility of deep convolutional neural networks (CNNs) as a theoretical framework for understanding biological vision in the context of image classification. Recent work on object recognition in human vision has shown that both global, and loc…	visual - object - objects - category - scene - image - images - vision - similarity - categorization - representations - shape - categories - stimuli - scenes - neural - cnns - recognition - memory - networks	0.598663	FALSE	Article		2020	9	VISION RESEARCH
Helpless infants are learning a foundation model	0	0_language_cognitive_word_computational	Topic1-Human Cognitive Science	['language', 'cognitive', 'word', 'computational', 'neural', 'human', 'representations', 'models', 'cognition', 'knowledge', 'model', 'semantic', 'artificial', 'learning', 'words', 'information', 'cognitive science', 'reasoning', 'representation', 'intelligence']	['Artificial intelligence, human cognition, and conscious supremacy. The computational significance of consciousness is an important and potentially more tractable research theme than the hard problem of consciousness, as one could look at the correlation of consciousness and computational capacities through, e.g., algorithmic or complexity analyses. In the literature, consciousness is defined as…	language - cognitive - word - computational - neural - human - representations - models - cognition - knowledge - model - semantic - artificial - learning - words - information - cognitive science - reasoning - representation - intelligence	0.118819	FALSE	Article		2024	3	TRENDS IN COGNITIVE SCIENCES
Dynamic networks of psychological symptoms, impairment, substance use, and social support: The evolution of psychopathology among emerging adults	19	19_ptsd_trauma_stress disorder_posttraumatic	Topic15-PTSD Detection	['ptsd', 'trauma', 'stress disorder', 'posttraumatic', 'stress', 'posttraumatic stress', 'traumatic', 'symptoms', 'posttraumatic stress disorder', 'childhood', 'stress disorder ptsd', 'disorder ptsd', 'abuse', 'maltreatment', 'traumatic stress', 'exposure', 'post traumatic', 'disorder', 'veterans', 'post traumatic stress']	['Hippocampal Resting-State Functional Connectivity Forecasts Individual Posttraumatic Stress Disorder Symptoms: A Data-Driven Approach. BACKGROUND: Posttraumatic stress disorder (PTSD) is a debilitating disorder, and there is no current accurate prediction of who develops it after trauma. Neurobiologically, individuals with chronic PTSD exhibit aberrant resting-state functional connectivity (rsF…	ptsd - trauma - stress disorder - posttraumatic - stress - posttraumatic stress - traumatic - symptoms - posttraumatic stress disorder - childhood - stress disorder ptsd - disorder ptsd - abuse - maltreatment - traumatic stress - exposure - post traumatic - disorder - veterans - post traumatic stress	0.087782	FALSE	Article	Cohort; network analysis; prospective; psychopathology; youth mental health	2022	4	EUROPEAN PSYCHIATRY
A novel diagnosis method for schizophrenia based on globus pallidus data	5	5_schizophrenia_psychosis_patients_controls	Topic8-Schizophrenia Detection	['schizophrenia', 'psychosis', 'patients', 'controls', 'functional', 'patients schizophrenia', 'episode', 'clinical', 'healthy', 'chr', 'schizophrenia patients', 'scz', 'sz', 'antipsychotic', 'healthy controls', 'connectivity', 'fep', 'brain', 'psychotic', 'classification']	['Metacognitive Training Modulates Default-Mode Network Homogeneity During 8-Week Olanzapine Treatment in Patients With Schizophrenia. Background Previous studies have revealed the efficacy of metacognitive training for schizophrenia. However, the underlying mechanisms of metacognitive training on brain function alterations, including the default-mode network (DMN), remain unknown. The present st…	schizophrenia - psychosis - patients - controls - functional - patients schizophrenia - episode - clinical - healthy - chr - schizophrenia patients - scz - sz - antipsychotic - healthy controls - connectivity - fep - brain - psychotic - classification	0.567261	FALSE	Article	Artificial neural network (ANN); Decision tree (DT); Logistic regression (LR); Gaussian Kernel classifier with SVM learner; (SVM-Kernel); k-Nearest Neighbor (kNN); Schizophrenia; Globus pallidus; Lateral ventricles	2023	0	PSYCHIATRY RESEARCH-NEUROIMAGING
Non-invasive brain stimulation for treating post-stroke depression: A network meta-analysis	12	12_mdd_functional_brain_bd	Topic6-AI Assisted Neuroimaging Analysis	['mdd', 'functional', 'brain', 'bd', 'connectivity', 'patients', 'disorder', 'depressive', 'depression', 'depressive disorder', 'major depressive disorder', 'major depressive', 'resting', 'resting state', 'gyrus', 'functional connectivity', 'bipolar', 'treatment', 'imaging', 'healthy']	['Morinda officinalis oligosaccharides modulate the default-mode network homogeneity in major depressive disorder at rest. Background: While prior studies have explored the efficacy of Morinda officinalis oligosaccharides (MOs) as a treatment for patients with major depressive disorder (MDD), the mechanistic basis for the effects of MOs on brain function or the default-mode network (DMN) has yet …	mdd - functional - brain - bd - connectivity - patients - disorder - depressive - depression - depressive disorder - major depressive disorder - major depressive - resting - resting state - gyrus - functional connectivity - bipolar - treatment - imaging - healthy	0.145816	FALSE	Article	network meta-analysis; noninvasive brain stimulation; post-stroke depression	2023	7	INTERNATIONAL JOURNAL OF GERIATRIC PSYCHIATRY
Academic Emotion Classification Using FER: A Systematic Review	6	6_facial_music_emotion_faces	Topic9-Affective Computing	['facial', 'music', 'emotion', 'faces', 'emotions', 'recognition', 'expressions', 'face', 'emotion recognition', 'emotional', 'musical', 'facial expressions', 'audio', 'eeg', 'expression', 'features', 'facial expression', 'affective', 'signals', 'valence']	["Facial Expression Emotion Recognition Model Integrating Philosophy and Machine Learning Theory. Facial expression emotion recognition is an intuitive reflection of a person's mental state, which contains rich emotional information, and is one of the most important forms of interpersonal communication. It can be used in various fields, including psychology. As a celebrity in ancient China, Zeng …	facial - music - emotion - faces - emotions - recognition - expressions - face - emotion recognition - emotional - musical - facial expressions - audio - eeg - expression - features - facial expression - affective - signals - valence	1	FALSE	Review		2023	7	HUMAN BEHAVIOR AND EMERGING TECHNOLOGIES
Effectiveness comparisons of various psychosocial therapies for cancer-related fatigue: A Bayesian network meta-analysis	1	1_depression_treatment_health_covid	Topic2-AI Assisted Depression Treatment	['depression', 'treatment', 'health', 'covid', 'anxiety', 'covid 19', '19', 'pandemic', 'mental', 'depressive', 'antidepressant', 'symptoms', 'predictors', 'machine learning', 'mental health', 'clinical', 'machine', 'psychiatric', 'patients', 'prediction']	['Mental health after the COVID-19 pandemic among Finnish youth: a repeated, cross-sectional, population-based study. Background High levels of mental health problems among young people were reported during the COVID-19 pandemic, but studies of the post-pandemic period are scarce. We assessed mental health problems among Finnish youth before, during, and after the COVID-19 pandemic using nationwi…	depression - treatment - health - covid - anxiety - covid 19 - 19 - pandemic - mental - depressive - antidepressant - symptoms - predictors - machine learning - mental health - clinical - machine - psychiatric - patients - prediction	0.500683	FALSE	Review	Psychosocial therapies; Cancer patients; Fatigue; Comparisons; Bayesian network meta-analysis	2022	14	JOURNAL OF AFFECTIVE DISORDERS
Neuromodulation treatments for post-traumatic stress disorder: A systematic review and network meta-analysis covering efficacy, acceptability, and follow-up effects	12	12_mdd_functional_brain_bd	Topic6-AI Assisted Neuroimaging Analysis	['mdd', 'functional', 'brain', 'bd', 'connectivity', 'patients', 'disorder', 'depressive', 'depression', 'depressive disorder', 'major depressive disorder', 'major depressive', 'resting', 'resting state', 'gyrus', 'functional connectivity', 'bipolar', 'treatment', 'imaging', 'healthy']	['Morinda officinalis oligosaccharides modulate the default-mode network homogeneity in major depressive disorder at rest. Background: While prior studies have explored the efficacy of Morinda officinalis oligosaccharides (MOs) as a treatment for patients with major depressive disorder (MDD), the mechanistic basis for the effects of MOs on brain function or the default-mode network (DMN) has yet …	mdd - functional - brain - bd - connectivity - patients - disorder - depressive - depression - depressive disorder - major depressive disorder - major depressive - resting - resting state - gyrus - functional connectivity - bipolar - treatment - imaging - healthy	0.132977	FALSE	Review	Network meta-analysis; Neuromodulation treatments; Post-traumatic stress disorder; Systematic review	2024	1	JOURNAL OF ANXIETY DISORDERS
Space coding for sensorimotor transformations can emerge through unsupervised learning	0	0_language_cognitive_word_computational	Topic1-Human Cognitive Science	['language', 'cognitive', 'word', 'computational', 'neural', 'human', 'representations', 'models', 'cognition', 'knowledge', 'model', 'semantic', 'artificial', 'learning', 'words', 'information', 'cognitive science', 'reasoning', 'representation', 'intelligence']	['Artificial intelligence, human cognition, and conscious supremacy. The computational significance of consciousness is an important and potentially more tractable research theme than the hard problem of consciousness, as one could look at the correlation of consciousness and computational capacities through, e.g., algorithmic or complexity analyses. In the literature, consciousness is defined as…	language - cognitive - word - computational - neural - human - representations - models - cognition - knowledge - model - semantic - artificial - learning - words - information - cognitive science - reasoning - representation - intelligence	0.435785	FALSE	Article	Neural network; Generative model; Sensorimotor transformations; Gain modulation; Parietal cortex	2012	7	COGNITIVE PROCESSING
Human vs. supervised machine learning: Who learns patterns faster?	0	0_language_cognitive_word_computational	Topic1-Human Cognitive Science	['language', 'cognitive', 'word', 'computational', 'neural', 'human', 'representations', 'models', 'cognition', 'knowledge', 'model', 'semantic', 'artificial', 'learning', 'words', 'information', 'cognitive science', 'reasoning', 'representation', 'intelligence']	['Artificial intelligence, human cognition, and conscious supremacy. The computational significance of consciousness is an important and potentially more tractable research theme than the hard problem of consciousness, as one could look at the correlation of consciousness and computational capacities through, e.g., algorithmic or complexity analyses. In the literature, consciousness is defined as…	language - cognitive - word - computational - neural - human - representations - models - cognition - knowledge - model - semantic - artificial - learning - words - information - cognitive science - reasoning - representation - intelligence	0.0967975	FALSE	Article	Supervised machine learning; Human learning; Cognitive psychology; Pattern recognition; Small sample size; Experimental study	2022	16	COGNITIVE SYSTEMS RESEARCH
Model for a flexible motor memory based on a self-active recurrent neural network	0	0_language_cognitive_word_computational	Topic1-Human Cognitive Science	['language', 'cognitive', 'word', 'computational', 'neural', 'human', 'representations', 'models', 'cognition', 'knowledge', 'model', 'semantic', 'artificial', 'learning', 'words', 'information', 'cognitive science', 'reasoning', 'representation', 'intelligence']	['Artificial intelligence, human cognition, and conscious supremacy. The computational significance of consciousness is an important and potentially more tractable research theme than the hard problem of consciousness, as one could look at the correlation of consciousness and computational capacities through, e.g., algorithmic or complexity analyses. In the literature, consciousness is defined as…	language - cognitive - word - computational - neural - human - representations - models - cognition - knowledge - model - semantic - artificial - learning - words - information - cognitive science - reasoning - representation - intelligence	1	FALSE	Article	Neural networks; Motor memory; Motor control; Motor learning; Reservoir computing	2013	5	HUMAN MOVEMENT SCIENCE
Unveiling consumers' ambivalence in embracing robotaxi services from a combined perspective of behavioral reasoning theory and technological readiness: a dual-stage PLS-SEM-ANN analysis	13	13_consumers_service_consumer_customer	Topic17-Intelligent Assistant and User Experience	['consumers', 'service', 'consumer', 'customer', 'intention', 'perceived', 'ai', 'chatbots', 'customers', 'chatbot', 'robots', 'purchase', 'brand', 'marketing', 'metaverse', 'technology', 'adoption', 'virtual', 'assistants', 'trust']	["Exploring users' adoption intentions of intelligent virtual assistants in financial services: An anthropomorphic perspectives and socio-psychological perspectives. With artificial intelligence entering all spheres of technology, it has also prompted financial businesses to enter into Intelligent Financial Technologies (FinTech). Chatbots and virtual assistants all are examples of how AI is used…	consumers - service - consumer - customer - intention - perceived - ai - chatbots - customers - chatbot - robots - purchase - brand - marketing - metaverse - technology - adoption - virtual - assistants - trust	1	FALSE	Article; Early Access	Robotaxi; Behavioral reasoning theory; Technological readiness; PLS-SEM-ANN; Autonomous vehicle; Intentions	2024	0	CURRENT PSYCHOLOGY
Anxiety in children and adolescents with autism spectrum disorder: behavioural phenotypes and environmental factors	7	7_asd_autism_autism spectrum_autism spectrum disorder	Topic12-Autism Detection	['asd', 'autism', 'autism spectrum', 'autism spectrum disorder', 'spectrum disorder', 'spectrum', 'children', 'autistic', 'spectrum disorder asd', 'disorder asd', 'children asd', 'disorder', 'td', 'children autism', 'individuals asd', 'neurodevelopmental', 'social', 'typically developing', 'children autism spectrum', 'toddlers']	['Aberrant Functional Connectivity of Neural Circuits Associated with Social and Sensorimotor Deficits in Young Children with Autism Spectrum Disorder. Autism spectrum disorder (ASD) is a neurodevelopmental disorder characterized by atypical functional integration of brain regions. The vast majority of neuroimaging studies of ASD have focused on older children, adolescents, and adults with the di…	asd - autism - autism spectrum - autism spectrum disorder - spectrum disorder - spectrum - children - autistic - spectrum disorder asd - disorder asd - children asd - disorder - td - children autism - individuals asd - neurodevelopmental - social - typically developing - children autism spectrum - toddlers	0.700291	FALSE	Article	Autism spectrum disorder; Anxiety; Depression; Peer problems; Stress	2024	1	BMC PSYCHOLOGY
Intuitive control of mobile robots: an architecture for autonomous adaptive dynamic behaviour integration	0	0_language_cognitive_word_computational	Topic1-Human Cognitive Science	['language', 'cognitive', 'word', 'computational', 'neural', 'human', 'representations', 'models', 'cognition', 'knowledge', 'model', 'semantic', 'artificial', 'learning', 'words', 'information', 'cognitive science', 'reasoning', 'representation', 'intelligence']	['Artificial intelligence, human cognition, and conscious supremacy. The computational significance of consciousness is an important and potentially more tractable research theme than the hard problem of consciousness, as one could look at the correlation of consciousness and computational capacities through, e.g., algorithmic or complexity analyses. In the literature, consciousness is defined as…	language - cognitive - word - computational - neural - human - representations - models - cognition - knowledge - model - semantic - artificial - learning - words - information - cognitive science - reasoning - representation - intelligence	1	FALSE	Article	Human-robot Interaction; Recurrent neural networks; Remote control; Distributed representations	2018	8	COGNITIVE PROCESSING
The dissemination effect of human-computer interactive advertising news-Using the theory of media audience and emotion management	3	3_personality_media_sentiment_social	Topic3-ML-based Personality Assessment	['personality', 'media', 'sentiment', 'social', 'social media', 'text', 'language', 'twitter', 'big', 'online', 'users', 'sentiment analysis', 'traits', 'natural language', 'news', 'content', 'public', 'analysis', 'data', 'psychological']	["Exploring a Language-Based Interest Assessment: Predicting Vocational Interests on Social Media Using Natural Language Processing. For more than a century, self-report inventories have been the traditional method for assessing vocational interests. Little research has examined the use of machine learning techniques, such as natural language processing (NLP), in interest assessment. This paper e…	personality - media - sentiment - social - social media - text - language - twitter - big - online - users - sentiment analysis - traits - natural language - news - content - public - analysis - data - psychological	0.0526757	FALSE	Article	interactive advertising; news; advertising; media audience; emotion management; convolutional neural network; recognition	2022	0	FRONTIERS IN PSYCHOLOGY
A comparison of two sleep spindle detection methods based on all night averages: individually adjusted vs. fixed frequencies	21	21_sleep_depression_stress_mood	Topic20-Digital Mental Health Monitoring	['sleep', 'depression', 'stress', 'mood', 'digital phenotyping', 'speech', 'features', 'smartphone', 'phenotyping', 'wearable', 'digital', 'data', 'symptoms', 'depressive', 'passive', 'activity', 'vocal', 'physiological', 'typing', 'using']	['Momentary Depression Severity Prediction in Patients With Acute Depression Who Undergo Sleep Deprivation Therapy: Speech-Based Machine Learning Approach. Background: Mobile devices for remote monitoring are inevitable tools to support treatment and patient care, especially in recurrent diseases such as major depressive disorder. The aim of this study was to learn if machine learning (ML) models…	sleep - depression - stress - mood - digital phenotyping - speech - features - smartphone - phenotyping - wearable - digital - data - symptoms - depressive - passive - activity - vocal - physiological - typing - using	0.0701137	FALSE	Article	EEG; sleep spindles; sigma waves; automatic detections; fixed frequency method; IAM; comparison	2015	48	FRONTIERS IN HUMAN NEUROSCIENCE
Computer Vision System for Expressing Texture Using Sound-Symbolic Words	14	14_visual_object_objects_category	Topic11-Visual Processing Mechanism and Modeling	['visual', 'object', 'objects', 'category', 'scene', 'image', 'images', 'vision', 'similarity', 'categorization', 'representations', 'shape', 'categories', 'stimuli', 'scenes', 'neural', 'cnns', 'recognition', 'memory', 'networks']	['A failure to learn object shape geometry: Implications for convolutional neural networks as plausible models of biological vision. Here we examine the plausibility of deep convolutional neural networks (CNNs) as a theoretical framework for understanding biological vision in the context of image classification. Recent work on object recognition in human vision has shown that both global, and loc…	visual - object - objects - category - scene - image - images - vision - similarity - categorization - representations - shape - categories - stimuli - scenes - neural - cnns - recognition - memory - networks	0.213184	FALSE	Article	texture; sound-symbolic words; tactile sensation; onomatopoeia; image databases	2021	1	FRONTIERS IN PSYCHOLOGY
Memorability shapes perceived time (and vice versa)	14	14_visual_object_objects_category	Topic11-Visual Processing Mechanism and Modeling	['visual', 'object', 'objects', 'category', 'scene', 'image', 'images', 'vision', 'similarity', 'categorization', 'representations', 'shape', 'categories', 'stimuli', 'scenes', 'neural', 'cnns', 'recognition', 'memory', 'networks']	['A failure to learn object shape geometry: Implications for convolutional neural networks as plausible models of biological vision. Here we examine the plausibility of deep convolutional neural networks (CNNs) as a theoretical framework for understanding biological vision in the context of image classification. Recent work on object recognition in human vision has shown that both global, and loc…	visual - object - objects - category - scene - image - images - vision - similarity - categorization - representations - shape - categories - stimuli - scenes - neural - cnns - recognition - memory - networks	1	FALSE	Article		2024	5	NATURE HUMAN BEHAVIOUR
A computer based system to design expressive avatars	6	6_facial_music_emotion_faces	Topic9-Affective Computing	['facial', 'music', 'emotion', 'faces', 'emotions', 'recognition', 'expressions', 'face', 'emotion recognition', 'emotional', 'musical', 'facial expressions', 'audio', 'eeg', 'expression', 'features', 'facial expression', 'affective', 'signals', 'valence']	["Facial Expression Emotion Recognition Model Integrating Philosophy and Machine Learning Theory. Facial expression emotion recognition is an intuitive reflection of a person's mental state, which contains rich emotional information, and is one of the most important forms of interpersonal communication. It can be used in various fields, including psychology. As a celebrity in ancient China, Zeng …	facial - music - emotion - faces - emotions - recognition - expressions - face - emotion recognition - emotional - musical - facial expressions - audio - eeg - expression - features - facial expression - affective - signals - valence	0.100358	FALSE	Article	Avatars; Emotions; Design; Neural networks; Genetic algorithms	2015	6	COMPUTERS IN HUMAN BEHAVIOR
Risk Prediction Models for Depression in Community-Dwelling Older Adults	1	1_depression_treatment_health_covid	Topic2-AI Assisted Depression Treatment	['depression', 'treatment', 'health', 'covid', 'anxiety', 'covid 19', '19', 'pandemic', 'mental', 'depressive', 'antidepressant', 'symptoms', 'predictors', 'machine learning', 'mental health', 'clinical', 'machine', 'psychiatric', 'patients', 'prediction']	['Mental health after the COVID-19 pandemic among Finnish youth: a repeated, cross-sectional, population-based study. Background High levels of mental health problems among young people were reported during the COVID-19 pandemic, but studies of the post-pandemic period are scarce. We assessed mental health problems among Finnish youth before, during, and after the COVID-19 pandemic using nationwi…	depression - treatment - health - covid - anxiety - covid 19 - 19 - pandemic - mental - depressive - antidepressant - symptoms - predictors - machine learning - mental health - clinical - machine - psychiatric - patients - prediction	0.217925	FALSE	Article	Late-life depression; older adults; risk prediction; risk factor; physical illness	2022	15	AMERICAN JOURNAL OF GERIATRIC PSYCHIATRY
Deep CANALs: a deep learning approach to refining the canalization theory of psychopathology	-1	-1_ocd_gut_gambling_delirium	NOISE	['ocd', 'gut', 'gambling', 'delirium', 'microbiota', 'obsessive', 'obsessive compulsive', 'compulsive', 'gut microbiota', 'patients', 'obsessive compulsive disorder', 'compulsive disorder', 'microbiome', 'igd', 'speech', 'violent', 'risk', 'machine learning', 'machine', 'using']	['Data-driven identification of subtypes of executive function across typical development, attention deficit hyperactivity disorder, and autism spectrum disorders. Background Impairment of executive function (EF), the goal-directed regulation of thoughts, actions, and emotions, drives negative outcomes and is common across neurodevelopmental disorders including attention deficit hyperactivity dis…	ocd - gut - gambling - delirium - microbiota - obsessive - obsessive compulsive - compulsive - gut microbiota - patients - obsessive compulsive disorder - compulsive disorder - microbiome - igd - speech - violent - risk - machine learning - machine - using	0.84236	FALSE	Article	machine learning; psychedelics; psychiatry; altered states; theories and models	2024	3	NEUROSCIENCE OF CONSCIOUSNESS
The Structure of Systematicity in the Brain	0	0_language_cognitive_word_computational	Topic1-Human Cognitive Science	['language', 'cognitive', 'word', 'computational', 'neural', 'human', 'representations', 'models', 'cognition', 'knowledge', 'model', 'semantic', 'artificial', 'learning', 'words', 'information', 'cognitive science', 'reasoning', 'representation', 'intelligence']	['Artificial intelligence, human cognition, and conscious supremacy. The computational significance of consciousness is an important and potentially more tractable research theme than the hard problem of consciousness, as one could look at the correlation of consciousness and computational capacities through, e.g., algorithmic or complexity analyses. In the literature, consciousness is defined as…	language - cognitive - word - computational - neural - human - representations - models - cognition - knowledge - model - semantic - artificial - learning - words - information - cognitive science - reasoning - representation - intelligence	0.300256	FALSE	Article	brain networks; computational models; deep neural networks; knowledge transfer; variable binding	2022	16	CURRENT DIRECTIONS IN PSYCHOLOGICAL SCIENCE
Using Diagnostic Classification Models to Validate Attribute Hierarchies and Evaluate Model Fit in Bayesian Networks	18	18_item_simulation_missing_dif	Topic16-ML in Psychometrics	['item', 'simulation', 'missing', 'dif', 'data', 'imputation', 'methods', 'method', 'missing data', 'variables', 'mathematics', 'reading', 'pisa', 'bayesian', 'machine learning', 'modeling', 'items', 'model', 'approach', 'estimation']	['One Model to Rule Them All? Using Machine Learning Algorithms to Determine the Number of Factors in Exploratory Factor Analysis. Determining the number of factors is one of the most crucial decisions a researcher has to face when conducting an exploratory factor analysis. As no common factor retention criterion can be seen as generally superior, a new approach is proposed-combining extensive da…	item - simulation - missing - dif - data - imputation - methods - method - missing data - variables - mathematics - reading - pisa - bayesian - machine learning - modeling - items - model - approach - estimation	1	FALSE	Article	Diagnostic classification models; Bayesian inference networks; model fit; attribute hierarchy	2020	15	MULTIVARIATE BEHAVIORAL RESEARCH
Neural network applications in consumer behavior	-1	-1_ocd_gut_gambling_delirium	NOISE	['ocd', 'gut', 'gambling', 'delirium', 'microbiota', 'obsessive', 'obsessive compulsive', 'compulsive', 'gut microbiota', 'patients', 'obsessive compulsive disorder', 'compulsive disorder', 'microbiome', 'igd', 'speech', 'violent', 'risk', 'machine learning', 'machine', 'using']	['Data-driven identification of subtypes of executive function across typical development, attention deficit hyperactivity disorder, and autism spectrum disorders. Background Impairment of executive function (EF), the goal-directed regulation of thoughts, actions, and emotions, drives negative outcomes and is common across neurodevelopmental disorders including attention deficit hyperactivity dis…	ocd - gut - gambling - delirium - microbiota - obsessive - obsessive compulsive - compulsive - gut microbiota - patients - obsessive compulsive disorder - compulsive disorder - microbiome - igd - speech - violent - risk - machine learning - machine - using	0.620105	FALSE	Article	Methodology; Regression; Structural equations; Discriminant analysis; Nonparametric	2010	11	JOURNAL OF CONSUMER PSYCHOLOGY
Network analysis: An overview for mental health research	19	19_ptsd_trauma_stress disorder_posttraumatic	Topic15-PTSD Detection	['ptsd', 'trauma', 'stress disorder', 'posttraumatic', 'stress', 'posttraumatic stress', 'traumatic', 'symptoms', 'posttraumatic stress disorder', 'childhood', 'stress disorder ptsd', 'disorder ptsd', 'abuse', 'maltreatment', 'traumatic stress', 'exposure', 'post traumatic', 'disorder', 'veterans', 'post traumatic stress']	['Hippocampal Resting-State Functional Connectivity Forecasts Individual Posttraumatic Stress Disorder Symptoms: A Data-Driven Approach. BACKGROUND: Posttraumatic stress disorder (PTSD) is a debilitating disorder, and there is no current accurate prediction of who develops it after trauma. Neurobiologically, individuals with chronic PTSD exhibit aberrant resting-state functional connectivity (rsF…	ptsd - trauma - stress disorder - posttraumatic - stress - posttraumatic stress - traumatic - symptoms - posttraumatic stress disorder - childhood - stress disorder ptsd - disorder ptsd - abuse - maltreatment - traumatic stress - exposure - post traumatic - disorder - veterans - post traumatic stress	0.0897438	FALSE	Article	network analysis; network modeling; network psychometrics; network psychopathology	2024	2	INTERNATIONAL JOURNAL OF METHODS IN PSYCHIATRIC RESEARCH
Students' adaptive deep learning path and teaching strategy of contemporary ceramic art under the background of Internet	2	2_students_teaching_education_teachers	Topic4-AI in Educational Psychology	['students', 'teaching', 'education', 'teachers', 'learning', 'educational', 'student', 'academic', 'ai', 'writing', 'college', 'learners', 'literacy', 'deep', 'deep learning', 'college students', 'classroom', 'motivation', 'teacher', 'english']	["Relationship between teacher's ability model and students' behavior based on emotion-behavior relevance theory and artificial intelligence technology under the background of curriculum ideological and political education. Purpose: This paper aims to fully understand the relationship between students' classroom emotions and teachers' behaviors in the teaching environment, provide personalized te…	students - teaching - education - teachers - learning - educational - student - academic - ai - writing - college - learners - literacy - deep - deep learning - college students - classroom - motivation - teacher - english	0.247247	FALSE	Article	Internet plus; ceramic art; deep learning; teaching strategy; personalized learning	2022	4	FRONTIERS IN PSYCHOLOGY
Monitoring and Evaluation of Human Nutrition and Health Based on Big Data Analysis	9	9_alcohol_substance_eating_use	Topic14-Substance Abuse Prediction	['alcohol', 'substance', 'eating', 'use', 'substance use', 'drinking', 'cannabis', 'alcohol use', 'use disorder', 'aud', 'binge', 'opioid', 'dependence', 'treatment', 'smoking', 'overdose', 'consumption', 'addiction', 'drug', 'binge eating']	['The prediction of resilience to alcohol consumption in youths: insular and subcallosal cingulate myeloarchitecture. Background The prediction of alcohol consumption in youths and particularly biomarkers of resilience, is critical for early intervention to reduce the risk of subsequent harmful alcohol use. Methods At baseline, the longitudinal relaxation rate (R1), indexing grey matter myelinati…	alcohol - substance - eating - use - substance use - drinking - cannabis - alcohol use - use disorder - aud - binge - opioid - dependence - treatment - smoking - overdose - consumption - addiction - drug - binge eating	0.0789159	FALSE	Article	human nutrition monitoring; human health evaluation; extensive data analysis	2022	0	REVISTA DE PSICOLOGIA DEL DEPORTE
Using Neural Networks with Routine Health Records to Identify Suicide Risk: Feasibility Study	4	4_suicide_suicidal_risk_suicide risk	Topic7-Suicide Prediction	['suicide', 'suicidal', 'risk', 'suicide risk', 'ideation', 'suicidal ideation', 'suicide attempts', 'attempts', 'suicide attempt', 'attempt', 'posts', 'health', 'si', 'suicidality', 'prevention', 'suicide prevention', 'self harm', 'death', 'risk suicide', 'suicidal behavior']	["Prediction of Sex-Specific Suicide Risk Using Machine Learning and Single-Payer Health Care Registry Data From Denmark. IMPORTANCE Suicide is a public health problem, with multiple causes that are poorly understood. The increased focus on combining health care data with machine-learning approaches in psychiatry may help advance the understanding of suicide risk. OBJECTIVE To examine sex-specifi…	suicide - suicidal - risk - suicide risk - ideation - suicidal ideation - suicide attempts - attempts - suicide attempt - attempt - posts - health - si - suicidality - prevention - suicide prevention - self harm - death - risk suicide - suicidal behavior	0.581023	FALSE	Article	suicide prevention; risk assessment; electronic health records; routine data; machine learning; artificial neural networks	2018	35	JMIR MENTAL HEALTH
Learning programs is better than learning dynamics: A programmable neural network hierarchical architecture in a multi-task scenario	0	0_language_cognitive_word_computational	Topic1-Human Cognitive Science	['language', 'cognitive', 'word', 'computational', 'neural', 'human', 'representations', 'models', 'cognition', 'knowledge', 'model', 'semantic', 'artificial', 'learning', 'words', 'information', 'cognitive science', 'reasoning', 'representation', 'intelligence']	['Artificial intelligence, human cognition, and conscious supremacy. The computational significance of consciousness is an important and potentially more tractable research theme than the hard problem of consciousness, as one could look at the correlation of consciousness and computational capacities through, e.g., algorithmic or complexity analyses. In the literature, consciousness is defined as…	language - cognitive - word - computational - neural - human - representations - models - cognition - knowledge - model - semantic - artificial - learning - words - information - cognitive science - reasoning - representation - intelligence	1	FALSE	Article	Programming neural networks; hierarchical organization; distributed representation; neuronal reuse; cognitive control	2016	14	ADAPTIVE BEHAVIOR
A deep neural network and transfer learning combined method for cross-task classification of error-related potentials	17	17_bci_eeg_gaze_eye	Topic23-Brain-Computer Interface	['bci', 'eeg', 'gaze', 'eye', 'brain computer', 'signals', 'mi', 'fnirs', 'brain computer interface', 'classification', 'computer interface', 'signal', 'motor imagery', 'motor', 'bcis', 'computer', 'imagery', 'decoding', 'eeg signals', 'interface']	['Artificial Intelligence Algorithms in Visual Evoked Potential-Based Brain-Computer Interfaces for Motor Rehabilitation Applications: Systematic Review and Future Directions. Brain-Computer Interface (BCI) is a technology that uses electroencephalographic (EEG) signals to control external devices, such as Functional Electrical Stimulation (FES). Visual BCI paradigms based on P300 and Steady Stat…	bci - eeg - gaze - eye - brain computer - signals - mi - fnirs - brain computer interface - classification - computer interface - signal - motor imagery - motor - bcis - computer - imagery - decoding - eeg signals - interface	1	FALSE	Article	error-related potentials; transfer learning; transformer; cross-task classification; brain-computer interface	2024	0	FRONTIERS IN HUMAN NEUROSCIENCE
A Four-Step Method for the Development of an ADHD-VR Digital Game Diagnostic Tool Prototype for Children Using a DL Model	26	26_adhd_hyperactivity_hyperactivity disorder_deficit hyperactivity disorder	Topic27-ADHD Detection	['adhd', 'hyperactivity', 'hyperactivity disorder', 'deficit hyperactivity disorder', 'deficit hyperactivity', 'attention deficit', 'attention deficit hyperactivity', 'deficit', 'disorder adhd', 'hyperactivity disorder adhd', 'attention', 'children', 'children adhd', 'adult adhd', 'adhd symptoms', 'disorder', 'adult', 'adhd diagnosis', 'symptoms', 'diagnosis']	['Application and Expansion of an Algorithm Predicting Attention-Deficit/Hyperactivity Disorder and Impairment in a Predominantly White Sample. Current assessment protocols for attention-deficit/hyperactivity disorder (ADHD) focus heavily on a set of highly overlapping symptoms, with well-validated factors like cognitive disengagement syndrome (CDS), executive function (EF), age, sex, and race an…	adhd - hyperactivity - hyperactivity disorder - deficit hyperactivity disorder - deficit hyperactivity - attention deficit - attention deficit hyperactivity - deficit - disorder adhd - hyperactivity disorder adhd - attention - children - children adhd - adult adhd - adhd symptoms - disorder - adult - adhd diagnosis - symptoms - diagnosis	1	FALSE	Article	attention-deficit; hyperactivity disorder; virtual reality; machine learning; diagnostic tool; neuropsychological test; Indonesia; digital game	2020	7	FRONTIERS IN PSYCHIATRY
Linking brain maturation and puberty during early adolescence using longitudinal brain age prediction in the ABCD cohort	12	12_mdd_functional_brain_bd	Topic6-AI Assisted Neuroimaging Analysis	['mdd', 'functional', 'brain', 'bd', 'connectivity', 'patients', 'disorder', 'depressive', 'depression', 'depressive disorder', 'major depressive disorder', 'major depressive', 'resting', 'resting state', 'gyrus', 'functional connectivity', 'bipolar', 'treatment', 'imaging', 'healthy']	['Morinda officinalis oligosaccharides modulate the default-mode network homogeneity in major depressive disorder at rest. Background: While prior studies have explored the efficacy of Morinda officinalis oligosaccharides (MOs) as a treatment for patients with major depressive disorder (MDD), the mechanistic basis for the effects of MOs on brain function or the default-mode network (DMN) has yet …	mdd - functional - brain - bd - connectivity - patients - disorder - depressive - depression - depressive disorder - major depressive disorder - major depressive - resting - resting state - gyrus - functional connectivity - bipolar - treatment - imaging - healthy	0.0636608	FALSE	Article	Brain age; Adolescence; Puberty; Sex-difference	2023	12	DEVELOPMENTAL COGNITIVE NEUROSCIENCE
Human Visual Cortex and Deep Convolutional Neural Network Care Deeply about Object Background	14	14_visual_object_objects_category	Topic11-Visual Processing Mechanism and Modeling	['visual', 'object', 'objects', 'category', 'scene', 'image', 'images', 'vision', 'similarity', 'categorization', 'representations', 'shape', 'categories', 'stimuli', 'scenes', 'neural', 'cnns', 'recognition', 'memory', 'networks']	['A failure to learn object shape geometry: Implications for convolutional neural networks as plausible models of biological vision. Here we examine the plausibility of deep convolutional neural networks (CNNs) as a theoretical framework for understanding biological vision in the context of image classification. Recent work on object recognition in human vision has shown that both global, and loc…	visual - object - objects - category - scene - image - images - vision - similarity - categorization - representations - shape - categories - stimuli - scenes - neural - cnns - recognition - memory - networks	1	FALSE	Article		2024	1	JOURNAL OF COGNITIVE NEUROSCIENCE
The minimal computational substrate of fluid intelligence	23	23_epilepsy_seizure_seizures_eeg	Topic22-Epilepsy Detection	['epilepsy', 'seizure', 'seizures', 'eeg', 'patients', 'epileptic', 'diagnosis', 'detection', 'brain', 'temporal', 'gyrus', 'classification', 'temporal lobe', 'lobe', 'neurological', 'features', 'functional', 'method', 'clinical', 'fnirs']	['Altered voxel-mirrored homotopic connectivity in right temporal lobe epilepsy as measured using resting-state fMRI and support vector machine analyses. BackgroundPrior reports revealed abnormalities in voxel-mirrored homotopic connectivity (VMHC) when analyzing neuroimaging data from patients with various psychiatric conditions, including temporal lobe epilepsy (TLE). Whether these VHMC changes…	epilepsy - seizure - seizures - eeg - patients - epileptic - diagnosis - detection - brain - temporal - gyrus - classification - temporal lobe - lobe - neurological - features - functional - method - clinical - fnirs	0.0677939	FALSE	Article	Raven's Advanced Progressive; Matrices; Fluid intelligence; Neuropsychological testing; Generative models; Lesion-deficit mapping	2024	0	CORTEX
Comparisons of deep learning and machine learning while using text mining methods to identify suicide attempts of patients with mood disorders	4	4_suicide_suicidal_risk_suicide risk	Topic7-Suicide Prediction	['suicide', 'suicidal', 'risk', 'suicide risk', 'ideation', 'suicidal ideation', 'suicide attempts', 'attempts', 'suicide attempt', 'attempt', 'posts', 'health', 'si', 'suicidality', 'prevention', 'suicide prevention', 'self harm', 'death', 'risk suicide', 'suicidal behavior']	["Prediction of Sex-Specific Suicide Risk Using Machine Learning and Single-Payer Health Care Registry Data From Denmark. IMPORTANCE Suicide is a public health problem, with multiple causes that are poorly understood. The increased focus on combining health care data with machine-learning approaches in psychiatry may help advance the understanding of suicide risk. OBJECTIVE To examine sex-specifi…	suicide - suicidal - risk - suicide risk - ideation - suicidal ideation - suicide attempts - attempts - suicide attempt - attempt - posts - health - si - suicidality - prevention - suicide prevention - self harm - death - risk suicide - suicidal behavior	0.158477	FALSE	Article	Deep learning; Text mining; Text classification; Mood disorders; Suicide attempts	2022	3	JOURNAL OF AFFECTIVE DISORDERS
Regional cerebral blood flow in Alzheimer's disease: Classification and analysis of heterogeneity	8	8_ad_dementia_mci_alzheimer	Topic10-Alzheimer Detection	['ad', 'dementia', 'mci', 'alzheimer', 'disease', 'alzheimer disease', 'age', 'cognitive impairment', 'brain age', 'brain', 'cognitive', 'impairment', 'aging', 'mild', 'mild cognitive', 'mild cognitive impairment', 'mri', 'aphasia', 'lesion', 'speech']	["Plasma d-glutamate levels for detecting mild cognitive impairment and Alzheimer's disease: Machine learning approaches. Background: d-glutamate, which is involved in N-methyl-d-aspartate receptor modulation, may be associated with cognitive ageing. Aims: This study aimed to use peripheral plasma d-glutamate levels to differentiate patients with mild cognitive impairment (MCI) and Alzheimer's di…	ad - dementia - mci - alzheimer - disease - alzheimer disease - age - cognitive impairment - brain age - brain - cognitive - impairment - aging - mild - mild cognitive - mild cognitive impairment - mri - aphasia - lesion - speech	1	FALSE	Article	Alzheimer's disease; artificial neural networks; cerebral blood flow; heterogeneity, regional cerebral blood flow	2004	23	DEMENTIA AND GERIATRIC COGNITIVE DISORDERS
Associative Learning on a Continuum in Evolved Dynamical Neural Networks	0	0_language_cognitive_word_computational	Topic1-Human Cognitive Science	['language', 'cognitive', 'word', 'computational', 'neural', 'human', 'representations', 'models', 'cognition', 'knowledge', 'model', 'semantic', 'artificial', 'learning', 'words', 'information', 'cognitive science', 'reasoning', 'representation', 'intelligence']	['Artificial intelligence, human cognition, and conscious supremacy. The computational significance of consciousness is an important and potentially more tractable research theme than the hard problem of consciousness, as one could look at the correlation of consciousness and computational capacities through, e.g., algorithmic or complexity analyses. In the literature, consciousness is defined as…	language - cognitive - word - computational - neural - human - representations - models - cognition - knowledge - model - semantic - artificial - learning - words - information - cognitive science - reasoning - representation - intelligence	1	FALSE	Article	associative learning; evolutionary robotics; dynamical systems theory; synaptic plasticity; evolution of learning	2008	37	ADAPTIVE BEHAVIOR
The temporal dependencies between social, emotional and physical health factors in young people receiving mental healthcare: a dynamic Bayesian network analysis	19	19_ptsd_trauma_stress disorder_posttraumatic	Topic15-PTSD Detection	['ptsd', 'trauma', 'stress disorder', 'posttraumatic', 'stress', 'posttraumatic stress', 'traumatic', 'symptoms', 'posttraumatic stress disorder', 'childhood', 'stress disorder ptsd', 'disorder ptsd', 'abuse', 'maltreatment', 'traumatic stress', 'exposure', 'post traumatic', 'disorder', 'veterans', 'post traumatic stress']	['Hippocampal Resting-State Functional Connectivity Forecasts Individual Posttraumatic Stress Disorder Symptoms: A Data-Driven Approach. BACKGROUND: Posttraumatic stress disorder (PTSD) is a debilitating disorder, and there is no current accurate prediction of who develops it after trauma. Neurobiologically, individuals with chronic PTSD exhibit aberrant resting-state functional connectivity (rsF…	ptsd - trauma - stress disorder - posttraumatic - stress - posttraumatic stress - traumatic - symptoms - posttraumatic stress disorder - childhood - stress disorder ptsd - disorder ptsd - abuse - maltreatment - traumatic stress - exposure - post traumatic - disorder - veterans - post traumatic stress	0.0904766	FALSE	Article	anxiety; causality; depression; functioning; mood disorders; personalised care; suicide ideation; youth	2023	4	EPIDEMIOLOGY AND PSYCHIATRIC SCIENCES
A model of cultural transmission by direct instruction: An exercise on replication and extension	0	0_language_cognitive_word_computational	Topic1-Human Cognitive Science	['language', 'cognitive', 'word', 'computational', 'neural', 'human', 'representations', 'models', 'cognition', 'knowledge', 'model', 'semantic', 'artificial', 'learning', 'words', 'information', 'cognitive science', 'reasoning', 'representation', 'intelligence']	['Artificial intelligence, human cognition, and conscious supremacy. The computational significance of consciousness is an important and potentially more tractable research theme than the hard problem of consciousness, as one could look at the correlation of consciousness and computational capacities through, e.g., algorithmic or complexity analyses. In the literature, consciousness is defined as…	language - cognitive - word - computational - neural - human - representations - models - cognition - knowledge - model - semantic - artificial - learning - words - information - cognitive science - reasoning - representation - intelligence	0.602171	FALSE	Article	Cultural transmission; Social learning; Agent-based modeling; Direct instruction; Replication; Extension	2018	4	COGNITIVE SYSTEMS RESEARCH
Why do some neurons in cortex respond to information in a selective manner? Insights from artificial neural networks	0	0_language_cognitive_word_computational	Topic1-Human Cognitive Science	['language', 'cognitive', 'word', 'computational', 'neural', 'human', 'representations', 'models', 'cognition', 'knowledge', 'model', 'semantic', 'artificial', 'learning', 'words', 'information', 'cognitive science', 'reasoning', 'representation', 'intelligence']	['Artificial intelligence, human cognition, and conscious supremacy. The computational significance of consciousness is an important and potentially more tractable research theme than the hard problem of consciousness, as one could look at the correlation of consciousness and computational capacities through, e.g., algorithmic or complexity analyses. In the literature, consciousness is defined as…	language - cognitive - word - computational - neural - human - representations - models - cognition - knowledge - model - semantic - artificial - learning - words - information - cognitive science - reasoning - representation - intelligence	1	FALSE	Article	Grandmother cells; Localist representations; Distributed representations; Short-term memory; Superposition catastrophe; Generalization	2016	11	COGNITION
Functional connectivity signatures of major depressive disorder: machine learning analysis of two multicenter neuroimaging studies	12	12_mdd_functional_brain_bd	Topic6-AI Assisted Neuroimaging Analysis	['mdd', 'functional', 'brain', 'bd', 'connectivity', 'patients', 'disorder', 'depressive', 'depression', 'depressive disorder', 'major depressive disorder', 'major depressive', 'resting', 'resting state', 'gyrus', 'functional connectivity', 'bipolar', 'treatment', 'imaging', 'healthy']	['Morinda officinalis oligosaccharides modulate the default-mode network homogeneity in major depressive disorder at rest. Background: While prior studies have explored the efficacy of Morinda officinalis oligosaccharides (MOs) as a treatment for patients with major depressive disorder (MDD), the mechanistic basis for the effects of MOs on brain function or the default-mode network (DMN) has yet …	mdd - functional - brain - bd - connectivity - patients - disorder - depressive - depression - depressive disorder - major depressive disorder - major depressive - resting - resting state - gyrus - functional connectivity - bipolar - treatment - imaging - healthy	0.4064	FALSE	Article		2023	35	MOLECULAR PSYCHIATRY
Interest identification from browser tab titles: A systematic literature review	3	3_personality_media_sentiment_social	Topic3-ML-based Personality Assessment	['personality', 'media', 'sentiment', 'social', 'social media', 'text', 'language', 'twitter', 'big', 'online', 'users', 'sentiment analysis', 'traits', 'natural language', 'news', 'content', 'public', 'analysis', 'data', 'psychological']	["Exploring a Language-Based Interest Assessment: Predicting Vocational Interests on Social Media Using Natural Language Processing. For more than a century, self-report inventories have been the traditional method for assessing vocational interests. Little research has examined the use of machine learning techniques, such as natural language processing (NLP), in interest assessment. This paper e…	personality - media - sentiment - social - social media - text - language - twitter - big - online - users - sentiment analysis - traits - natural language - news - content - public - analysis - data - psychological	0.218959	FALSE	Review	Software engineering; User interests identification; Non-verbal communication; Empirical studies; Systematic literature review	2022	7	COMPUTERS IN HUMAN BEHAVIOR REPORTS
Machine learning and the prediction of suicide in psychiatric populations: a systematic review	4	4_suicide_suicidal_risk_suicide risk	Topic7-Suicide Prediction	['suicide', 'suicidal', 'risk', 'suicide risk', 'ideation', 'suicidal ideation', 'suicide attempts', 'attempts', 'suicide attempt', 'attempt', 'posts', 'health', 'si', 'suicidality', 'prevention', 'suicide prevention', 'self harm', 'death', 'risk suicide', 'suicidal behavior']	["Prediction of Sex-Specific Suicide Risk Using Machine Learning and Single-Payer Health Care Registry Data From Denmark. IMPORTANCE Suicide is a public health problem, with multiple causes that are poorly understood. The increased focus on combining health care data with machine-learning approaches in psychiatry may help advance the understanding of suicide risk. OBJECTIVE To examine sex-specifi…	suicide - suicidal - risk - suicide risk - ideation - suicidal ideation - suicide attempts - attempts - suicide attempt - attempt - posts - health - si - suicidality - prevention - suicide prevention - self harm - death - risk suicide - suicidal behavior	1	FALSE	Review		2024	8	TRANSLATIONAL PSYCHIATRY
There Can Be no Other Reason for this Behavior: Issues in the Ascription of Knowledge to Humans and AI	11	11_trust_ai_human_moral	Topic5-Trust in AI	['trust', 'ai', 'human', 'moral', 'agents', 'intelligence', 'artificial intelligence', 'artificial', 'humans', 'decision', 'team', 'robots', 'systems', 'teams', 'agent', 'people', 'xai', 'human ai', 'artificial intelligence ai', 'intelligence ai']	["When combinations of humans and AI are useful: A systematic review and meta-analysis. Inspired by the increasing use of artificial intelligence (AI) to augment humans, researchers have studied human-AI systems involving different tasks, systems and populations. Despite such a large body of work, we lack a broad conceptual understanding of when combinations of humans and AI are better than eithe…	trust - ai - human - moral - agents - intelligence - artificial intelligence - artificial - humans - decision - team - robots - systems - teams - agent - people - xai - human ai - artificial intelligence ai - intelligence ai	0.0754494	FALSE	Article	Artificial intelligence; Discourse analysis; Behavioral explanations; Habitus; Forms of life; Deep neural networks	2022	2	INTEGRATIVE PSYCHOLOGICAL AND BEHAVIORAL SCIENCE
Deep Learning-Based Text Emotion Analysis for Legal Anomie	3	3_personality_media_sentiment_social	Topic3-ML-based Personality Assessment	['personality', 'media', 'sentiment', 'social', 'social media', 'text', 'language', 'twitter', 'big', 'online', 'users', 'sentiment analysis', 'traits', 'natural language', 'news', 'content', 'public', 'analysis', 'data', 'psychological']	["Exploring a Language-Based Interest Assessment: Predicting Vocational Interests on Social Media Using Natural Language Processing. For more than a century, self-report inventories have been the traditional method for assessing vocational interests. Little research has examined the use of machine learning techniques, such as natural language processing (NLP), in interest assessment. This paper e…	personality - media - sentiment - social - social media - text - language - twitter - big - online - users - sentiment analysis - traits - natural language - news - content - public - analysis - data - psychological	0.0719135	FALSE	Article	legal anomie analysis; text emotion analysis; deep learning; convolutional neural network; Bi-directional long short-term memory; emotion analysis	2022	2	FRONTIERS IN PSYCHOLOGY
Online interpretable dynamic prediction models for postoperative delirium after cardiac surgery under cardiopulmonary bypass developed based on machine learning algorithms: A retrospective cohort study	-1	-1_ocd_gut_gambling_delirium	NOISE	['ocd', 'gut', 'gambling', 'delirium', 'microbiota', 'obsessive', 'obsessive compulsive', 'compulsive', 'gut microbiota', 'patients', 'obsessive compulsive disorder', 'compulsive disorder', 'microbiome', 'igd', 'speech', 'violent', 'risk', 'machine learning', 'machine', 'using']	['Data-driven identification of subtypes of executive function across typical development, attention deficit hyperactivity disorder, and autism spectrum disorders. Background Impairment of executive function (EF), the goal-directed regulation of thoughts, actions, and emotions, drives negative outcomes and is common across neurodevelopmental disorders including attention deficit hyperactivity dis…	ocd - gut - gambling - delirium - microbiota - obsessive - obsessive compulsive - compulsive - gut microbiota - patients - obsessive compulsive disorder - compulsive disorder - microbiome - igd - speech - violent - risk - machine learning - machine - using	0.866963	FALSE	Article	Postoperative delirium; Cardiac surgery; Cardiopulmonary bypass; Machine learning; Dynamic prediction; Pre; and post-operative models	2024	2	JOURNAL OF PSYCHOSOMATIC RESEARCH
Classification and deep-learning-based prediction of Alzheimer disease subtypes by using genomic data	8	8_ad_dementia_mci_alzheimer	Topic10-Alzheimer Detection	['ad', 'dementia', 'mci', 'alzheimer', 'disease', 'alzheimer disease', 'age', 'cognitive impairment', 'brain age', 'brain', 'cognitive', 'impairment', 'aging', 'mild', 'mild cognitive', 'mild cognitive impairment', 'mri', 'aphasia', 'lesion', 'speech']	["Plasma d-glutamate levels for detecting mild cognitive impairment and Alzheimer's disease: Machine learning approaches. Background: d-glutamate, which is involved in N-methyl-d-aspartate receptor modulation, may be associated with cognitive ageing. Aims: This study aimed to use peripheral plasma d-glutamate levels to differentiate patients with mild cognitive impairment (MCI) and Alzheimer's di…	ad - dementia - mci - alzheimer - disease - alzheimer disease - age - cognitive impairment - brain age - brain - cognitive - impairment - aging - mild - mild cognitive - mild cognitive impairment - mri - aphasia - lesion - speech	1	FALSE	Article		2023	12	TRANSLATIONAL PSYCHIATRY
A unified computational model of the development of object unity, object permanence, and occluded object trajectory perception	14	14_visual_object_objects_category	Topic11-Visual Processing Mechanism and Modeling	['visual', 'object', 'objects', 'category', 'scene', 'image', 'images', 'vision', 'similarity', 'categorization', 'representations', 'shape', 'categories', 'stimuli', 'scenes', 'neural', 'cnns', 'recognition', 'memory', 'networks']	['A failure to learn object shape geometry: Implications for convolutional neural networks as plausible models of biological vision. Here we examine the plausibility of deep convolutional neural networks (CNNs) as a theoretical framework for understanding biological vision in the context of image classification. Recent work on object recognition in human vision has shown that both global, and loc…	visual - object - objects - category - scene - image - images - vision - similarity - categorization - representations - shape - categories - stimuli - scenes - neural - cnns - recognition - memory - networks	0.533016	FALSE	Article	Infant development; Object unity; Occlusion; Object permanence; Computational model; Neural network; Prediction	2010	8	INFANT BEHAVIOR & DEVELOPMENT
A putative role for neurogenesis in neurocomputational terms: Inferences from a hippocampal model	0	0_language_cognitive_word_computational	Topic1-Human Cognitive Science	['language', 'cognitive', 'word', 'computational', 'neural', 'human', 'representations', 'models', 'cognition', 'knowledge', 'model', 'semantic', 'artificial', 'learning', 'words', 'information', 'cognitive science', 'reasoning', 'representation', 'intelligence']	['Artificial intelligence, human cognition, and conscious supremacy. The computational significance of consciousness is an important and potentially more tractable research theme than the hard problem of consciousness, as one could look at the correlation of consciousness and computational capacities through, e.g., algorithmic or complexity analyses. In the literature, consciousness is defined as…	language - cognitive - word - computational - neural - human - representations - models - cognition - knowledge - model - semantic - artificial - learning - words - information - cognitive science - reasoning - representation - intelligence	1	FALSE	Article	Computational model; Neurogenesis; Hippocampus; Episodic memory; Hebbian learning	2009	61	COGNITION
The error in total error reduction	0	0_language_cognitive_word_computational	Topic1-Human Cognitive Science	['language', 'cognitive', 'word', 'computational', 'neural', 'human', 'representations', 'models', 'cognition', 'knowledge', 'model', 'semantic', 'artificial', 'learning', 'words', 'information', 'cognitive science', 'reasoning', 'representation', 'intelligence']	['Artificial intelligence, human cognition, and conscious supremacy. The computational significance of consciousness is an important and potentially more tractable research theme than the hard problem of consciousness, as one could look at the correlation of consciousness and computational capacities through, e.g., algorithmic or complexity analyses. In the literature, consciousness is defined as…	language - cognitive - word - computational - neural - human - representations - models - cognition - knowledge - model - semantic - artificial - learning - words - information - cognitive science - reasoning - representation - intelligence	1	FALSE	Review	Within-compound associations; Cue competition; Associative learning; Conditioned inhibition; Pavlovian conditioning; Total error reduction; Local error reduction	2014	12	NEUROBIOLOGY OF LEARNING AND MEMORY
Reasoning With Causal Cycles	0	0_language_cognitive_word_computational	Topic1-Human Cognitive Science	['language', 'cognitive', 'word', 'computational', 'neural', 'human', 'representations', 'models', 'cognition', 'knowledge', 'model', 'semantic', 'artificial', 'learning', 'words', 'information', 'cognitive science', 'reasoning', 'representation', 'intelligence']	['Artificial intelligence, human cognition, and conscious supremacy. The computational significance of consciousness is an important and potentially more tractable research theme than the hard problem of consciousness, as one could look at the correlation of consciousness and computational capacities through, e.g., algorithmic or complexity analyses. In the literature, consciousness is defined as…	language - cognitive - word - computational - neural - human - representations - models - cognition - knowledge - model - semantic - artificial - learning - words - information - cognitive science - reasoning - representation - intelligence	0.0932868	FALSE	Article	Categorization; Causal reasoning; Causal graphical models; Chain graphs; Causal cycles; Dynamic systems	2017	1	COGNITIVE SCIENCE
Bayesian method in psychology: A bibliometric analysis	18	18_item_simulation_missing_dif	Topic16-ML in Psychometrics	['item', 'simulation', 'missing', 'dif', 'data', 'imputation', 'methods', 'method', 'missing data', 'variables', 'mathematics', 'reading', 'pisa', 'bayesian', 'machine learning', 'modeling', 'items', 'model', 'approach', 'estimation']	['One Model to Rule Them All? Using Machine Learning Algorithms to Determine the Number of Factors in Exploratory Factor Analysis. Determining the number of factors is one of the most crucial decisions a researcher has to face when conducting an exploratory factor analysis. As no common factor retention criterion can be seen as generally superior, a new approach is proposed-combining extensive da…	item - simulation - missing - dif - data - imputation - methods - method - missing data - variables - mathematics - reading - pisa - bayesian - machine learning - modeling - items - model - approach - estimation	1	FALSE	Article	Bayesian method; Psychology; Psychological subfields; Publishing trends; Bibliographic mapping	2024	1	CURRENT PSYCHOLOGY
Suicide mortality among youth in southern Brazil: a spatiotemporal evaluation of socioeconomic vulnerability	4	4_suicide_suicidal_risk_suicide risk	Topic7-Suicide Prediction	['suicide', 'suicidal', 'risk', 'suicide risk', 'ideation', 'suicidal ideation', 'suicide attempts', 'attempts', 'suicide attempt', 'attempt', 'posts', 'health', 'si', 'suicidality', 'prevention', 'suicide prevention', 'self harm', 'death', 'risk suicide', 'suicidal behavior']	["Prediction of Sex-Specific Suicide Risk Using Machine Learning and Single-Payer Health Care Registry Data From Denmark. IMPORTANCE Suicide is a public health problem, with multiple causes that are poorly understood. The increased focus on combining health care data with machine-learning approaches in psychiatry may help advance the understanding of suicide risk. OBJECTIVE To examine sex-specifi…	suicide - suicidal - risk - suicide risk - ideation - suicidal ideation - suicide attempts - attempts - suicide attempt - attempt - posts - health - si - suicidality - prevention - suicide prevention - self harm - death - risk suicide - suicidal behavior	1	FALSE	Article	Suicide; socioeconomic factors; spatial analysis; public health; epidemiology	2020	12	BRAZILIAN JOURNAL OF PSYCHIATRY
False memories for scenes using the DRM paradigm	14	14_visual_object_objects_category	Topic11-Visual Processing Mechanism and Modeling	['visual', 'object', 'objects', 'category', 'scene', 'image', 'images', 'vision', 'similarity', 'categorization', 'representations', 'shape', 'categories', 'stimuli', 'scenes', 'neural', 'cnns', 'recognition', 'memory', 'networks']	['A failure to learn object shape geometry: Implications for convolutional neural networks as plausible models of biological vision. Here we examine the plausibility of deep convolutional neural networks (CNNs) as a theoretical framework for understanding biological vision in the context of image classification. Recent work on object recognition in human vision has shown that both global, and loc…	visual - object - objects - category - scene - image - images - vision - similarity - categorization - representations - shape - categories - stimuli - scenes - neural - cnns - recognition - memory - networks	1	FALSE	Article	Visual scenes; Deep convolutional networks; Visual memory; DRM	2021	5	VISION RESEARCH
Superior temporal gyrus functional connectivity predicts transcranial direct current stimulation response in Schizophrenia: A machine learning study	5	5_schizophrenia_psychosis_patients_controls	Topic8-Schizophrenia Detection	['schizophrenia', 'psychosis', 'patients', 'controls', 'functional', 'patients schizophrenia', 'episode', 'clinical', 'healthy', 'chr', 'schizophrenia patients', 'scz', 'sz', 'antipsychotic', 'healthy controls', 'connectivity', 'fep', 'brain', 'psychotic', 'classification']	['Metacognitive Training Modulates Default-Mode Network Homogeneity During 8-Week Olanzapine Treatment in Patients With Schizophrenia. Background Previous studies have revealed the efficacy of metacognitive training for schizophrenia. However, the underlying mechanisms of metacognitive training on brain function alterations, including the default-mode network (DMN), remain unknown. The present st…	schizophrenia - psychosis - patients - controls - functional - patients schizophrenia - episode - clinical - healthy - chr - schizophrenia patients - scz - sz - antipsychotic - healthy controls - connectivity - fep - brain - psychotic - classification	0.253036	FALSE	Article	transcranial direct current stimulation (tDCS); Schizophrenia; auditory verbal hallucinations; resting-state functional connectivity; machine learning; treatment response	2022	9	FRONTIERS IN PSYCHIATRY
Longitudinal symptomatic interactions in long-standing schizophrenia: a novel five-point analysis based on directed acyclic graphs	19	19_ptsd_trauma_stress disorder_posttraumatic	Topic15-PTSD Detection	['ptsd', 'trauma', 'stress disorder', 'posttraumatic', 'stress', 'posttraumatic stress', 'traumatic', 'symptoms', 'posttraumatic stress disorder', 'childhood', 'stress disorder ptsd', 'disorder ptsd', 'abuse', 'maltreatment', 'traumatic stress', 'exposure', 'post traumatic', 'disorder', 'veterans', 'post traumatic stress']	['Hippocampal Resting-State Functional Connectivity Forecasts Individual Posttraumatic Stress Disorder Symptoms: A Data-Driven Approach. BACKGROUND: Posttraumatic stress disorder (PTSD) is a debilitating disorder, and there is no current accurate prediction of who develops it after trauma. Neurobiologically, individuals with chronic PTSD exhibit aberrant resting-state functional connectivity (rsF…	ptsd - trauma - stress disorder - posttraumatic - stress - posttraumatic stress - traumatic - symptoms - posttraumatic stress disorder - childhood - stress disorder ptsd - disorder ptsd - abuse - maltreatment - traumatic stress - exposure - post traumatic - disorder - veterans - post traumatic stress	0.0824331	FALSE	Article	Affect; Bayesian analysis; longitudinal studies; negative symptoms; network models; positive symptoms; schizophrenia	2023	13	PSYCHOLOGICAL MEDICINE
A PLS-Neural Network Analysis of Motivational Orientations Leading to Facebook Engagement and the Moderating Roles of Flow and Age	3	3_personality_media_sentiment_social	Topic3-ML-based Personality Assessment	['personality', 'media', 'sentiment', 'social', 'social media', 'text', 'language', 'twitter', 'big', 'online', 'users', 'sentiment analysis', 'traits', 'natural language', 'news', 'content', 'public', 'analysis', 'data', 'psychological']	["Exploring a Language-Based Interest Assessment: Predicting Vocational Interests on Social Media Using Natural Language Processing. For more than a century, self-report inventories have been the traditional method for assessing vocational interests. Little research has examined the use of machine learning techniques, such as natural language processing (NLP), in interest assessment. This paper e…	personality - media - sentiment - social - social media - text - language - twitter - big - online - users - sentiment analysis - traits - natural language - news - content - public - analysis - data - psychological	0.206701	FALSE	Article	engagement; Facebook; enjoyment; self-presentation; community belonging; flow; age	2020	8	FRONTIERS IN PSYCHOLOGY
Machine Learning Methods for Predicting Postpartum Depression: Scoping Review	-1	-1_ocd_gut_gambling_delirium	NOISE	['ocd', 'gut', 'gambling', 'delirium', 'microbiota', 'obsessive', 'obsessive compulsive', 'compulsive', 'gut microbiota', 'patients', 'obsessive compulsive disorder', 'compulsive disorder', 'microbiome', 'igd', 'speech', 'violent', 'risk', 'machine learning', 'machine', 'using']	['Data-driven identification of subtypes of executive function across typical development, attention deficit hyperactivity disorder, and autism spectrum disorders. Background Impairment of executive function (EF), the goal-directed regulation of thoughts, actions, and emotions, drives negative outcomes and is common across neurodevelopmental disorders including attention deficit hyperactivity dis…	ocd - gut - gambling - delirium - microbiota - obsessive - obsessive compulsive - compulsive - gut microbiota - patients - obsessive compulsive disorder - compulsive disorder - microbiome - igd - speech - violent - risk - machine learning - machine - using	0.52443	FALSE	Review	machine learning; postpartum depression; big data; mobile phone	2021	20	JMIR MENTAL HEALTH
Precise localization of corneal reflections in eye images using deep learning trained on synthetic data	17	17_bci_eeg_gaze_eye	Topic23-Brain-Computer Interface	['bci', 'eeg', 'gaze', 'eye', 'brain computer', 'signals', 'mi', 'fnirs', 'brain computer interface', 'classification', 'computer interface', 'signal', 'motor imagery', 'motor', 'bcis', 'computer', 'imagery', 'decoding', 'eeg signals', 'interface']	['Artificial Intelligence Algorithms in Visual Evoked Potential-Based Brain-Computer Interfaces for Motor Rehabilitation Applications: Systematic Review and Future Directions. Brain-Computer Interface (BCI) is a technology that uses electroencephalographic (EEG) signals to control external devices, such as Functional Electrical Stimulation (FES). Visual BCI paradigms based on P300 and Steady Stat…	bci - eeg - gaze - eye - brain computer - signals - mi - fnirs - brain computer interface - classification - computer interface - signal - motor imagery - motor - bcis - computer - imagery - decoding - eeg signals - interface	0.119577	FALSE	Article	Eye tracking; Gaze estimation; Neural networks; Simulations; Corneal reflection; P-CR	2024	1	BEHAVIOR RESEARCH METHODS
Stealth assessment of creativity in a physics video game	22	22_creativity_creative_art_aesthetic	Topic26-AI in Creativity Research	['creativity', 'creative', 'art', 'aesthetic', 'artworks', 'ai', 'human', 'human creativity', 'artwork', 'divergent', 'artistic', 'image', 'originality', 'thinking', 'semantic distance', 'painting', 'artists', 'paintings', 'creative process', 'literary']	["Art therapy to control nail biting using a cognitive behavioral approach through new innovative game and animation. BackgroundNail biting is categorized as a habitual behavior, commonly observed in children and occasionally in adults. This disorder occurs unconsciously, with individuals often unaware of their behavior. Since there are physical and psychological complications and quality of life…	creativity - creative - art - aesthetic - artworks - ai - human - human creativity - artwork - divergent - artistic - image - originality - thinking - semantic distance - painting - artists - paintings - creative process - literary	1	FALSE	Article	Creativity; Stealth assessment; Video games; 21st-century skills; Physics playground	2021	52	COMPUTERS IN HUMAN BEHAVIOR
Neuropsychiatric symptom clusters targeted for treatment at earlier versus later stages of dementia	8	8_ad_dementia_mci_alzheimer	Topic10-Alzheimer Detection	['ad', 'dementia', 'mci', 'alzheimer', 'disease', 'alzheimer disease', 'age', 'cognitive impairment', 'brain age', 'brain', 'cognitive', 'impairment', 'aging', 'mild', 'mild cognitive', 'mild cognitive impairment', 'mri', 'aphasia', 'lesion', 'speech']	["Plasma d-glutamate levels for detecting mild cognitive impairment and Alzheimer's disease: Machine learning approaches. Background: d-glutamate, which is involved in N-methyl-d-aspartate receptor modulation, may be associated with cognitive ageing. Aims: This study aimed to use peripheral plasma d-glutamate levels to differentiate patients with mild cognitive impairment (MCI) and Alzheimer's di…	ad - dementia - mci - alzheimer - disease - alzheimer disease - age - cognitive impairment - brain age - brain - cognitive - impairment - aging - mild - mild cognitive - mild cognitive impairment - mri - aphasia - lesion - speech	1	FALSE	Article	neuropsychiatric symptoms; dementia; stage; symptom; multiple correspondence analysis; connectivity graphs	2015	16	INTERNATIONAL JOURNAL OF GERIATRIC PSYCHIATRY
Distributional Transformation Improves Decoding Accuracy When Predicting Chronological Age From Structural MRI	8	8_ad_dementia_mci_alzheimer	Topic10-Alzheimer Detection	['ad', 'dementia', 'mci', 'alzheimer', 'disease', 'alzheimer disease', 'age', 'cognitive impairment', 'brain age', 'brain', 'cognitive', 'impairment', 'aging', 'mild', 'mild cognitive', 'mild cognitive impairment', 'mri', 'aphasia', 'lesion', 'speech']	["Plasma d-glutamate levels for detecting mild cognitive impairment and Alzheimer's disease: Machine learning approaches. Background: d-glutamate, which is involved in N-methyl-d-aspartate receptor modulation, may be associated with cognitive ageing. Aims: This study aimed to use peripheral plasma d-glutamate levels to differentiate patients with mild cognitive impairment (MCI) and Alzheimer's di…	ad - dementia - mci - alzheimer - disease - alzheimer disease - age - cognitive impairment - brain age - brain - cognitive - impairment - aging - mild - mild cognitive - mild cognitive impairment - mri - aphasia - lesion - speech	0.273497	FALSE	Article	chronological age; structural MRI; prediction; decoding; machine learning; structural neuroimaging; distributional transformation; continuous variables	2020	2	FRONTIERS IN PSYCHIATRY
An ergonomic evaluation using a deep learning approach for assessing postural risks in a virtual reality-based smart manufacturing context	20	20_sports_players_athletes_sport	Topic24-AI in Sports Psychology	['sports', 'players', 'athletes', 'sport', 'physical', 'lifting', 'soccer', 'football', 'postures', 'gait', 'education', 'performance', 'training', 'coaches', 'basketball', 'player', 'muscle', 'action', 'body', 'posture']	["Recognizing upper limb movements with wrist worn inertial sensors using k-means clustering classification. In this paper we present a methodology for recognizing three fundamental movements of the human forearm (extension, flexion and rotation) using pattern recognition applied to the data from a single wrist-worn, inertial sensor. We propose that this technique could be used as a clinical tool…	sports - players - athletes - sport - physical - lifting - soccer - football - postures - gait - education - performance - training - coaches - basketball - player - muscle - action - body - posture	1	FALSE	Article	Ergonomics; virtual reality; deep learning; RULA; REBA	2024	0	ERGONOMICS
Mapping the Pathways Between Posttraumatic Stress Disorder, Depression, and Alcohol and Cannabis Use: A Network Analysis	19	19_ptsd_trauma_stress disorder_posttraumatic	Topic15-PTSD Detection	['ptsd', 'trauma', 'stress disorder', 'posttraumatic', 'stress', 'posttraumatic stress', 'traumatic', 'symptoms', 'posttraumatic stress disorder', 'childhood', 'stress disorder ptsd', 'disorder ptsd', 'abuse', 'maltreatment', 'traumatic stress', 'exposure', 'post traumatic', 'disorder', 'veterans', 'post traumatic stress']	['Hippocampal Resting-State Functional Connectivity Forecasts Individual Posttraumatic Stress Disorder Symptoms: A Data-Driven Approach. BACKGROUND: Posttraumatic stress disorder (PTSD) is a debilitating disorder, and there is no current accurate prediction of who develops it after trauma. Neurobiologically, individuals with chronic PTSD exhibit aberrant resting-state functional connectivity (rsF…	ptsd - trauma - stress disorder - posttraumatic - stress - posttraumatic stress - traumatic - symptoms - posttraumatic stress disorder - childhood - stress disorder ptsd - disorder ptsd - abuse - maltreatment - traumatic stress - exposure - post traumatic - disorder - veterans - post traumatic stress	0.107961	FALSE	Article	Alcohol use; cannabis use; depression; PTSD; network analysis; directed acyclic graph	2024	3	JOURNAL OF DUAL DIAGNOSIS
Computational models of stimulus equivalence: An intersection for the study of symbolic behavior	0	0_language_cognitive_word_computational	Topic1-Human Cognitive Science	['language', 'cognitive', 'word', 'computational', 'neural', 'human', 'representations', 'models', 'cognition', 'knowledge', 'model', 'semantic', 'artificial', 'learning', 'words', 'information', 'cognitive science', 'reasoning', 'representation', 'intelligence']	['Artificial intelligence, human cognition, and conscious supremacy. The computational significance of consciousness is an important and potentially more tractable research theme than the hard problem of consciousness, as one could look at the correlation of consciousness and computational capacities through, e.g., algorithmic or complexity analyses. In the literature, consciousness is defined as…	language - cognitive - word - computational - neural - human - representations - models - cognition - knowledge - model - semantic - artificial - learning - words - information - cognitive science - reasoning - representation - intelligence	0.243655	FALSE	Review	artificial neural networks; computational models; reinforcement learning; stimulus equivalence; symbolic behavior	2023	3	JOURNAL OF THE EXPERIMENTAL ANALYSIS OF BEHAVIOR
Artificial neural networks estimate the contribution of taste neurons to coding	0	0_language_cognitive_word_computational	Topic1-Human Cognitive Science	['language', 'cognitive', 'word', 'computational', 'neural', 'human', 'representations', 'models', 'cognition', 'knowledge', 'model', 'semantic', 'artificial', 'learning', 'words', 'information', 'cognitive science', 'reasoning', 'representation', 'intelligence']	['Artificial intelligence, human cognition, and conscious supremacy. The computational significance of consciousness is an important and potentially more tractable research theme than the hard problem of consciousness, as one could look at the correlation of consciousness and computational capacities through, e.g., algorithmic or complexity analyses. In the literature, consciousness is defined as…	language - cognitive - word - computational - neural - human - representations - models - cognition - knowledge - model - semantic - artificial - learning - words - information - cognitive science - reasoning - representation - intelligence	0.350725	FALSE	Article	artificial neural netowrks; taste neurons; coding	2000	4	PHYSIOLOGY & BEHAVIOR
Multi-modal convergence maps: from body schema and self-representation to mental imagery	0	0_language_cognitive_word_computational	Topic1-Human Cognitive Science	['language', 'cognitive', 'word', 'computational', 'neural', 'human', 'representations', 'models', 'cognition', 'knowledge', 'model', 'semantic', 'artificial', 'learning', 'words', 'information', 'cognitive science', 'reasoning', 'representation', 'intelligence']	['Artificial intelligence, human cognition, and conscious supremacy. The computational significance of consciousness is an important and potentially more tractable research theme than the hard problem of consciousness, as one could look at the correlation of consciousness and computational capacities through, e.g., algorithmic or complexity analyses. In the literature, consciousness is defined as…	language - cognitive - word - computational - neural - human - representations - models - cognition - knowledge - model - semantic - artificial - learning - words - information - cognitive science - reasoning - representation - intelligence	1	FALSE	Article	Body schema; self-organizing map; robot; vision; proprioception; language	2013	31	ADAPTIVE BEHAVIOR
Adapting to a New Country During an Expatriate Mission: The Vital Role of Events and Emotions	1	1_depression_treatment_health_covid	Topic2-AI Assisted Depression Treatment	['depression', 'treatment', 'health', 'covid', 'anxiety', 'covid 19', '19', 'pandemic', 'mental', 'depressive', 'antidepressant', 'symptoms', 'predictors', 'machine learning', 'mental health', 'clinical', 'machine', 'psychiatric', 'patients', 'prediction']	['Mental health after the COVID-19 pandemic among Finnish youth: a repeated, cross-sectional, population-based study. Background High levels of mental health problems among young people were reported during the COVID-19 pandemic, but studies of the post-pandemic period are scarce. We assessed mental health problems among Finnish youth before, during, and after the COVID-19 pandemic using nationwi…	depression - treatment - health - covid - anxiety - covid 19 - 19 - pandemic - mental - depressive - antidepressant - symptoms - predictors - machine learning - mental health - clinical - machine - psychiatric - patients - prediction	0.0597376	FALSE	Article	expatriate; adaptation; events; emotions	2022	1	NONLINEAR DYNAMICS PSYCHOLOGY AND LIFE SCIENCES
Gender Perception From Gait: A Comparison Between Biological, Biomimetic and Non-biomimetic Learning Paradigms	20	20_sports_players_athletes_sport	Topic24-AI in Sports Psychology	['sports', 'players', 'athletes', 'sport', 'physical', 'lifting', 'soccer', 'football', 'postures', 'gait', 'education', 'performance', 'training', 'coaches', 'basketball', 'player', 'muscle', 'action', 'body', 'posture']	["Recognizing upper limb movements with wrist worn inertial sensors using k-means clustering classification. In this paper we present a methodology for recognizing three fundamental movements of the human forearm (extension, flexion and rotation) using pattern recognition applied to the data from a single wrist-worn, inertial sensor. We propose that this technique could be used as a clinical tool…	sports - players - athletes - sport - physical - lifting - soccer - football - postures - gait - education - performance - training - coaches - basketball - player - muscle - action - body - posture	0.633888	FALSE	Article	motion perception; biological motion; gait; machine learning; human perception; machine perception	2020	2	FRONTIERS IN HUMAN NEUROSCIENCE
BrainCDNet: a concatenated deep neural network for the detection of brain tumors from MRI images	8	8_ad_dementia_mci_alzheimer	Topic10-Alzheimer Detection	['ad', 'dementia', 'mci', 'alzheimer', 'disease', 'alzheimer disease', 'age', 'cognitive impairment', 'brain age', 'brain', 'cognitive', 'impairment', 'aging', 'mild', 'mild cognitive', 'mild cognitive impairment', 'mri', 'aphasia', 'lesion', 'speech']	["Plasma d-glutamate levels for detecting mild cognitive impairment and Alzheimer's disease: Machine learning approaches. Background: d-glutamate, which is involved in N-methyl-d-aspartate receptor modulation, may be associated with cognitive ageing. Aims: This study aimed to use peripheral plasma d-glutamate levels to differentiate patients with mild cognitive impairment (MCI) and Alzheimer's di…	ad - dementia - mci - alzheimer - disease - alzheimer disease - age - cognitive impairment - brain age - brain - cognitive - impairment - aging - mild - mild cognitive - mild cognitive impairment - mri - aphasia - lesion - speech	0.141539	FALSE	Article	brain tumors; deep learning; magnetic resonance imaging; Nimble filter; normalization	2024	0	FRONTIERS IN HUMAN NEUROSCIENCE
Developing crossmodal expression recognition based on a deep neural model	6	6_facial_music_emotion_faces	Topic9-Affective Computing	['facial', 'music', 'emotion', 'faces', 'emotions', 'recognition', 'expressions', 'face', 'emotion recognition', 'emotional', 'musical', 'facial expressions', 'audio', 'eeg', 'expression', 'features', 'facial expression', 'affective', 'signals', 'valence']	["Facial Expression Emotion Recognition Model Integrating Philosophy and Machine Learning Theory. Facial expression emotion recognition is an intuitive reflection of a person's mental state, which contains rich emotional information, and is one of the most important forms of interpersonal communication. It can be used in various fields, including psychology. As a celebrity in ancient China, Zeng …	facial - music - emotion - faces - emotions - recognition - expressions - face - emotion recognition - emotional - musical - facial expressions - audio - eeg - expression - features - facial expression - affective - signals - valence	1	FALSE	Article	Crossmodal learning; emotion expression recognition; convolution neural network; self-organizing maps	2016	53	ADAPTIVE BEHAVIOR
Computational Simulation of Equivalence Class Formation Using the go/no-go Procedure with Compound Stimuli	0	0_language_cognitive_word_computational	Topic1-Human Cognitive Science	['language', 'cognitive', 'word', 'computational', 'neural', 'human', 'representations', 'models', 'cognition', 'knowledge', 'model', 'semantic', 'artificial', 'learning', 'words', 'information', 'cognitive science', 'reasoning', 'representation', 'intelligence']	['Artificial intelligence, human cognition, and conscious supremacy. The computational significance of consciousness is an important and potentially more tractable research theme than the hard problem of consciousness, as one could look at the correlation of consciousness and computational capacities through, e.g., algorithmic or complexity analyses. In the literature, consciousness is defined as…	language - cognitive - word - computational - neural - human - representations - models - cognition - knowledge - model - semantic - artificial - learning - words - information - cognitive science - reasoning - representation - intelligence	0.255268	FALSE	Article	Simulation; Artificial intelligence; Equivalence; Compound stimulus; Go/no-go procedure	2016	13	PSYCHOLOGICAL RECORD
Visual Scenes Are Categorized by Function	14	14_visual_object_objects_category	Topic11-Visual Processing Mechanism and Modeling	['visual', 'object', 'objects', 'category', 'scene', 'image', 'images', 'vision', 'similarity', 'categorization', 'representations', 'shape', 'categories', 'stimuli', 'scenes', 'neural', 'cnns', 'recognition', 'memory', 'networks']	['A failure to learn object shape geometry: Implications for convolutional neural networks as plausible models of biological vision. Here we examine the plausibility of deep convolutional neural networks (CNNs) as a theoretical framework for understanding biological vision in the context of image classification. Recent work on object recognition in human vision has shown that both global, and loc…	visual - object - objects - category - scene - image - images - vision - similarity - categorization - representations - shape - categories - stimuli - scenes - neural - cnns - recognition - memory - networks	1	FALSE	Article	scene understanding; categorization; similarity	2016	59	JOURNAL OF EXPERIMENTAL PSYCHOLOGY-GENERAL
A computer vision approach for classifying isometric grip force exertion levels	20	20_sports_players_athletes_sport	Topic24-AI in Sports Psychology	['sports', 'players', 'athletes', 'sport', 'physical', 'lifting', 'soccer', 'football', 'postures', 'gait', 'education', 'performance', 'training', 'coaches', 'basketball', 'player', 'muscle', 'action', 'body', 'posture']	["Recognizing upper limb movements with wrist worn inertial sensors using k-means clustering classification. In this paper we present a methodology for recognizing three fundamental movements of the human forearm (extension, flexion and rotation) using pattern recognition applied to the data from a single wrist-worn, inertial sensor. We propose that this technique could be used as a clinical tool…	sports - players - athletes - sport - physical - lifting - soccer - football - postures - gait - education - performance - training - coaches - basketball - player - muscle - action - body - posture	1	FALSE	Article	Computer vision; high force exertions; facial expressions; machine learning	2020	21	ERGONOMICS
Machine-learning approaches to substance-abuse research: emerging trends and their implications	9	9_alcohol_substance_eating_use	Topic14-Substance Abuse Prediction	['alcohol', 'substance', 'eating', 'use', 'substance use', 'drinking', 'cannabis', 'alcohol use', 'use disorder', 'aud', 'binge', 'opioid', 'dependence', 'treatment', 'smoking', 'overdose', 'consumption', 'addiction', 'drug', 'binge eating']	['The prediction of resilience to alcohol consumption in youths: insular and subcallosal cingulate myeloarchitecture. Background The prediction of alcohol consumption in youths and particularly biomarkers of resilience, is critical for early intervention to reduce the risk of subsequent harmful alcohol use. Methods At baseline, the longitudinal relaxation rate (R1), indexing grey matter myelinati…	alcohol - substance - eating - use - substance use - drinking - cannabis - alcohol use - use disorder - aud - binge - opioid - dependence - treatment - smoking - overdose - consumption - addiction - drug - binge eating	1	FALSE	Review	detection; diagnosis; machine learning; predictive modelling; substance use disorders; treatment outcomes	2020	44	CURRENT OPINION IN PSYCHIATRY
Detecting major depressive disorder presence using passively-collected wearable movement data in a nationally-representative sample	21	21_sleep_depression_stress_mood	Topic20-Digital Mental Health Monitoring	['sleep', 'depression', 'stress', 'mood', 'digital phenotyping', 'speech', 'features', 'smartphone', 'phenotyping', 'wearable', 'digital', 'data', 'symptoms', 'depressive', 'passive', 'activity', 'vocal', 'physiological', 'typing', 'using']	['Momentary Depression Severity Prediction in Patients With Acute Depression Who Undergo Sleep Deprivation Therapy: Speech-Based Machine Learning Approach. Background: Mobile devices for remote monitoring are inevitable tools to support treatment and patient care, especially in recurrent diseases such as major depressive disorder. The aim of this study was to learn if machine learning (ML) models…	sleep - depression - stress - mood - digital phenotyping - speech - features - smartphone - phenotyping - wearable - digital - data - symptoms - depressive - passive - activity - vocal - physiological - typing - using	1	FALSE	Article	Major depressive disorder; Depression presence; Movement behavior; Sedentary behavior; Sleep behavior	2024	8	PSYCHIATRY RESEARCH
Development of an early-warning system for high-risk patients for suicide attempt using deep learning and electronic health records	4	4_suicide_suicidal_risk_suicide risk	Topic7-Suicide Prediction	['suicide', 'suicidal', 'risk', 'suicide risk', 'ideation', 'suicidal ideation', 'suicide attempts', 'attempts', 'suicide attempt', 'attempt', 'posts', 'health', 'si', 'suicidality', 'prevention', 'suicide prevention', 'self harm', 'death', 'risk suicide', 'suicidal behavior']	["Prediction of Sex-Specific Suicide Risk Using Machine Learning and Single-Payer Health Care Registry Data From Denmark. IMPORTANCE Suicide is a public health problem, with multiple causes that are poorly understood. The increased focus on combining health care data with machine-learning approaches in psychiatry may help advance the understanding of suicide risk. OBJECTIVE To examine sex-specifi…	suicide - suicidal - risk - suicide risk - ideation - suicidal ideation - suicide attempts - attempts - suicide attempt - attempt - posts - health - si - suicidality - prevention - suicide prevention - self harm - death - risk suicide - suicidal behavior	1	FALSE	Article		2020	52	TRANSLATIONAL PSYCHIATRY
The Challenge of Modeling the Acquisition of Mathematical Concepts	0	0_language_cognitive_word_computational	Topic1-Human Cognitive Science	['language', 'cognitive', 'word', 'computational', 'neural', 'human', 'representations', 'models', 'cognition', 'knowledge', 'model', 'semantic', 'artificial', 'learning', 'words', 'information', 'cognitive science', 'reasoning', 'representation', 'intelligence']	['Artificial intelligence, human cognition, and conscious supremacy. The computational significance of consciousness is an important and potentially more tractable research theme than the hard problem of consciousness, as one could look at the correlation of consciousness and computational capacities through, e.g., algorithmic or complexity analyses. In the literature, consciousness is defined as…	language - cognitive - word - computational - neural - human - representations - models - cognition - knowledge - model - semantic - artificial - learning - words - information - cognitive science - reasoning - representation - intelligence	0.0991589	FALSE	Article	computational modeling; artificial neural networks; deep learning; number sense; symbol grounding; mathematical learning; embodied cognition; material culture	2020	8	FRONTIERS IN HUMAN NEUROSCIENCE
Self supervised learning based emotion recognition using physiological signals	6	6_facial_music_emotion_faces	Topic9-Affective Computing	['facial', 'music', 'emotion', 'faces', 'emotions', 'recognition', 'expressions', 'face', 'emotion recognition', 'emotional', 'musical', 'facial expressions', 'audio', 'eeg', 'expression', 'features', 'facial expression', 'affective', 'signals', 'valence']	["Facial Expression Emotion Recognition Model Integrating Philosophy and Machine Learning Theory. Facial expression emotion recognition is an intuitive reflection of a person's mental state, which contains rich emotional information, and is one of the most important forms of interpersonal communication. It can be used in various fields, including psychology. As a celebrity in ancient China, Zeng …	facial - music - emotion - faces - emotions - recognition - expressions - face - emotion recognition - emotional - musical - facial expressions - audio - eeg - expression - features - facial expression - affective - signals - valence	1	FALSE	Article	emotional recognition; self-supervised learning; physiological signals; representation learning; deep learning	2024	1	FRONTIERS IN HUMAN NEUROSCIENCE
Neural Network Model for Predicting Student Failure in the Academic Leveling Course of Escuela Politecnica Nacional	2	2_students_teaching_education_teachers	Topic4-AI in Educational Psychology	['students', 'teaching', 'education', 'teachers', 'learning', 'educational', 'student', 'academic', 'ai', 'writing', 'college', 'learners', 'literacy', 'deep', 'deep learning', 'college students', 'classroom', 'motivation', 'teacher', 'english']	["Relationship between teacher's ability model and students' behavior based on emotion-behavior relevance theory and artificial intelligence technology under the background of curriculum ideological and political education. Purpose: This paper aims to fully understand the relationship between students' classroom emotions and teachers' behaviors in the teaching environment, provide personalized te…	students - teaching - education - teachers - learning - educational - student - academic - ai - writing - college - learners - literacy - deep - deep learning - college students - classroom - motivation - teacher - english	0.245497	FALSE	Article	neural network; predictive modeling; student success; academic leveling course; learning analytics; academic performance	2020	7	FRONTIERS IN PSYCHOLOGY
Applications of neural networks in training science	20	20_sports_players_athletes_sport	Topic24-AI in Sports Psychology	['sports', 'players', 'athletes', 'sport', 'physical', 'lifting', 'soccer', 'football', 'postures', 'gait', 'education', 'performance', 'training', 'coaches', 'basketball', 'player', 'muscle', 'action', 'body', 'posture']	["Recognizing upper limb movements with wrist worn inertial sensors using k-means clustering classification. In this paper we present a methodology for recognizing three fundamental movements of the human forearm (extension, flexion and rotation) using pattern recognition applied to the data from a single wrist-worn, inertial sensor. We propose that this technique could be used as a clinical tool…	sports - players - athletes - sport - physical - lifting - soccer - football - postures - gait - education - performance - training - coaches - basketball - player - muscle - action - body - posture	1	FALSE	Article	Neural network; Sports athletes	2012	50	HUMAN MOVEMENT SCIENCE
Butterfly effects in perceptual development: A review of the 'adaptive initial degradation' hypothesis	14	14_visual_object_objects_category	Topic11-Visual Processing Mechanism and Modeling	['visual', 'object', 'objects', 'category', 'scene', 'image', 'images', 'vision', 'similarity', 'categorization', 'representations', 'shape', 'categories', 'stimuli', 'scenes', 'neural', 'cnns', 'recognition', 'memory', 'networks']	['A failure to learn object shape geometry: Implications for convolutional neural networks as plausible models of biological vision. Here we examine the plausibility of deep convolutional neural networks (CNNs) as a theoretical framework for understanding biological vision in the context of image classification. Recent work on object recognition in human vision has shown that both global, and loc…	visual - object - objects - category - scene - image - images - vision - similarity - categorization - representations - shape - categories - stimuli - scenes - neural - cnns - recognition - memory - networks	0.204927	FALSE	Review	Adaptive initial degradations; Visual development; Late sight -onset; Prenatal hearing; Deep networks	2024	5	DEVELOPMENTAL REVIEW
A predictive model for classifying college students' academic performance based on visual-spatial skills	2	2_students_teaching_education_teachers	Topic4-AI in Educational Psychology	['students', 'teaching', 'education', 'teachers', 'learning', 'educational', 'student', 'academic', 'ai', 'writing', 'college', 'learners', 'literacy', 'deep', 'deep learning', 'college students', 'classroom', 'motivation', 'teacher', 'english']	["Relationship between teacher's ability model and students' behavior based on emotion-behavior relevance theory and artificial intelligence technology under the background of curriculum ideological and political education. Purpose: This paper aims to fully understand the relationship between students' classroom emotions and teachers' behaviors in the teaching environment, provide personalized te…	students - teaching - education - teachers - learning - educational - student - academic - ai - writing - college - learners - literacy - deep - deep learning - college students - classroom - motivation - teacher - english	0.325092	FALSE	Article	visual-spatial skills; academic performance; achievement prediction; classification model; neural network	2024	0	FRONTIERS IN PSYCHOLOGY
Strategies for selecting and evaluating information	0	0_language_cognitive_word_computational	Topic1-Human Cognitive Science	['language', 'cognitive', 'word', 'computational', 'neural', 'human', 'representations', 'models', 'cognition', 'knowledge', 'model', 'semantic', 'artificial', 'learning', 'words', 'information', 'cognitive science', 'reasoning', 'representation', 'intelligence']	['Artificial intelligence, human cognition, and conscious supremacy. The computational significance of consciousness is an important and potentially more tractable research theme than the hard problem of consciousness, as one could look at the correlation of consciousness and computational capacities through, e.g., algorithmic or complexity analyses. In the literature, consciousness is defined as…	language - cognitive - word - computational - neural - human - representations - models - cognition - knowledge - model - semantic - artificial - learning - words - information - cognitive science - reasoning - representation - intelligence	0.20867	FALSE	Article	Information search; OED framework; Utility functions; Inquiry; Question asking; Strategies; Probabilistic reasoning; Bayesian Networks	2020	9	COGNITIVE PSYCHOLOGY
Evolving plastic neural networks with novelty search	0	0_language_cognitive_word_computational	Topic1-Human Cognitive Science	['language', 'cognitive', 'word', 'computational', 'neural', 'human', 'representations', 'models', 'cognition', 'knowledge', 'model', 'semantic', 'artificial', 'learning', 'words', 'information', 'cognitive science', 'reasoning', 'representation', 'intelligence']	['Artificial intelligence, human cognition, and conscious supremacy. The computational significance of consciousness is an important and potentially more tractable research theme than the hard problem of consciousness, as one could look at the correlation of consciousness and computational capacities through, e.g., algorithmic or complexity analyses. In the literature, consciousness is defined as…	language - cognitive - word - computational - neural - human - representations - models - cognition - knowledge - model - semantic - artificial - learning - words - information - cognitive science - reasoning - representation - intelligence	1	FALSE	Article	Novelty search; neural networks; adaptation; learning; neuromodulation; neuroevolution	2010	55	ADAPTIVE BEHAVIOR
Inference in the Wild: A Framework for Human Situation Assessment and a Case Study of Air Combat	11	11_trust_ai_human_moral	Topic5-Trust in AI	['trust', 'ai', 'human', 'moral', 'agents', 'intelligence', 'artificial intelligence', 'artificial', 'humans', 'decision', 'team', 'robots', 'systems', 'teams', 'agent', 'people', 'xai', 'human ai', 'artificial intelligence ai', 'intelligence ai']	["When combinations of humans and AI are useful: A systematic review and meta-analysis. Inspired by the increasing use of artificial intelligence (AI) to augment humans, researchers have studied human-AI systems involving different tasks, systems and populations. Despite such a large body of work, we lack a broad conceptual understanding of when combinations of humans and AI are better than eithe…	trust - ai - human - moral - agents - intelligence - artificial intelligence - artificial - humans - decision - team - robots - systems - teams - agent - people - xai - human ai - artificial intelligence ai - intelligence ai	0.0775913	FALSE	Article	Situation awareness; Decision making; Expertise; Mental models; Cognitive modeling	2018	12	COGNITIVE SCIENCE
Inferring causal networks from observations and interventions	0	0_language_cognitive_word_computational	Topic1-Human Cognitive Science	['language', 'cognitive', 'word', 'computational', 'neural', 'human', 'representations', 'models', 'cognition', 'knowledge', 'model', 'semantic', 'artificial', 'learning', 'words', 'information', 'cognitive science', 'reasoning', 'representation', 'intelligence']	['Artificial intelligence, human cognition, and conscious supremacy. The computational significance of consciousness is an important and potentially more tractable research theme than the hard problem of consciousness, as one could look at the correlation of consciousness and computational capacities through, e.g., algorithmic or complexity analyses. In the literature, consciousness is defined as…	language - cognitive - word - computational - neural - human - representations - models - cognition - knowledge - model - semantic - artificial - learning - words - information - cognitive science - reasoning - representation - intelligence	0.0888394	FALSE	Article	causal reasoning; decision making; Bayesian networks; Bayesian models; rational inference; hypothesis testing; active learning; observational learning; interventions; structure learning; web experiments; human experimentation; computer simulation	2003	334	COGNITIVE SCIENCE
Fertility Intentions for a Second Child and Their Influencing Factors in Contemporary China	1	1_depression_treatment_health_covid	Topic2-AI Assisted Depression Treatment	['depression', 'treatment', 'health', 'covid', 'anxiety', 'covid 19', '19', 'pandemic', 'mental', 'depressive', 'antidepressant', 'symptoms', 'predictors', 'machine learning', 'mental health', 'clinical', 'machine', 'psychiatric', 'patients', 'prediction']	['Mental health after the COVID-19 pandemic among Finnish youth: a repeated, cross-sectional, population-based study. Background High levels of mental health problems among young people were reported during the COVID-19 pandemic, but studies of the post-pandemic period are scarce. We assessed mental health problems among Finnish youth before, during, and after the COVID-19 pandemic using nationwi…	depression - treatment - health - covid - anxiety - covid 19 - 19 - pandemic - mental - depressive - antidepressant - symptoms - predictors - machine learning - mental health - clinical - machine - psychiatric - patients - prediction	0.0500152	FALSE	Article	fertility intentions; two-child policy; machine learning; artificial neural network; random forest; XG-boost; logistic regression	2022	9	FRONTIERS IN PSYCHOLOGY
Harnessing Few-Shot Learning for EEG signal classification: a survey of state-of-the-art techniques and future directions	17	17_bci_eeg_gaze_eye	Topic23-Brain-Computer Interface	['bci', 'eeg', 'gaze', 'eye', 'brain computer', 'signals', 'mi', 'fnirs', 'brain computer interface', 'classification', 'computer interface', 'signal', 'motor imagery', 'motor', 'bcis', 'computer', 'imagery', 'decoding', 'eeg signals', 'interface']	['Artificial Intelligence Algorithms in Visual Evoked Potential-Based Brain-Computer Interfaces for Motor Rehabilitation Applications: Systematic Review and Future Directions. Brain-Computer Interface (BCI) is a technology that uses electroencephalographic (EEG) signals to control external devices, such as Functional Electrical Stimulation (FES). Visual BCI paradigms based on P300 and Steady Stat…	bci - eeg - gaze - eye - brain computer - signals - mi - fnirs - brain computer interface - classification - computer interface - signal - motor imagery - motor - bcis - computer - imagery - decoding - eeg signals - interface	1	FALSE	Article	EEG signals; Few-Shot Learning; Data Augmentation; Transfer Learning; Auto Augment; Subject Invariance; spatiotemporal modeling; geometric transformations	2024	0	FRONTIERS IN HUMAN NEUROSCIENCE
[truncated: 9,752 more rows]
